# Supplementary material for: An environmentally benign way to synthesize 2-thiocyano-1,3-dicarbonyl compounds with high antifungal activity: a key role of solvent
Source: Royal Society of Chemistry journal article supplement (doi:10.1039/d3ob00474k), 2023-01-01

## Supporting Information

### **An environmentally benign way to 2-thiocyano-1,3-dicarbonyl compounds with high antifungal activity: a key role of solvent**

*Andrey S. Kirillov,<sup>a</sup> Egor A. Semenov,<sup>a</sup> Oleg V. Bityukov,<sup>a</sup> Maria A. Kuznetsova,<sup>b</sup> Valentina N. Demidova,<sup>b</sup> Alexander N. Rogozhin,<sup>b</sup> Alexei P. Glinushkin,<sup>b</sup> Vera A. Vil',<sup>\*a</sup> Alexander O. Terent'ev<sup>\*a</sup>*

*<sup>a</sup> N. D. Zelinsky Institute of Organic Chemistry, Russian Academy of Sciences,  
47 Leninsky prosp., 119991 Moscow, Russian Federation  
e-mail, terentev@ioc.ac.ru*

*<sup>b</sup> All-Russian Research Institute for Phytopathology, B. Vyazyomy, 143050, Moscow  
Region, Russian Federation*

#### **Table of contents**

|                                                                |     |
|----------------------------------------------------------------|-----|
| General materials and methods .....                            | S2  |
| Calculation of the amount of electric current .....            | S2  |
| General Experimental Procedure for Table 1. ....               | S3  |
| General Experimental Procedure for Table 2 (entry 1). ....     | S3  |
| Experimental Procedure for Scheme 2 .....                      | S3  |
| Characterization of synthesized thiocyanates .....             | S4  |
| CV study .....                                                 | S11 |
| Experimental procedures for Scheme 3. Control experiments..... | S12 |
| Bioassay of fungicidal activity .....                          | S13 |
| Translaminar activity study.....                               | S14 |
| References .....                                               | S16 |
| NMR spectra of synthesized thiocyanates .....                  | S17 |
| HRMS spectra of synthesized thiocyanates .....                 | S56 |

## General materials and methods

$^1\text{H}$ ,  $^{13}\text{C}$  and  $^{19}\text{F}$  NMR spectra were recorded on Bruker AVANCE II 300 spectrometer (300.13, 75.48 and 282 MHz, respectively) in  $\text{CDCl}_3$ . Chemical shifts were reported in parts per million (ppm), and the residual solvent peak was used as an internal reference:  $^1\text{H}$  ( $\text{CDCl}_3$   $\delta=7.25$  ppm),  $^{13}\text{C}$  ( $\text{CDCl}_3$   $\delta=77.00$  ppm). Multiplicity was indicated as follows: s (singlet), d (doublet), t (triplet), q (quartet), sept (septet), m (multiplet).

High resolution mass spectra (HR-MS) were measured on a Bruker micrOTOF II instrument using electrospray ionization (ESI).<sup>1</sup> The measurements were performed in a positive ion mode (interface capillary voltage - 4500 V); mass range from  $m/z$  50 to  $m/z$  3000 Da; external calibration with Electrospray Calibrant Solution (Fluka). A syringe injection was used for all acetonitrile solutions (flow rate 3  $\mu\text{L}/\text{min}$ ). Nitrogen was applied as a dry gas; interface temperature was set at 180  $^\circ\text{C}$ .

The TLC analysis was carried out on standard silica gel chromatography plates (DC-Fertigfolien ALUGRAMR Xtra SIL G/UV254). Column chromatography was performed using silica gel (0.060-0.200 mm, 60 A, CAS 7631-86-9, Acros).

Acetic acid,  $\text{HCOOH}$ , TFA,  $\text{NaSCN}$ ,  $\text{KSCN}$ ,  $\text{NH}_4\text{SCN}$ ,  $\text{Br}_2$ ,  $n\text{-Bu}_4\text{NBF}_4$ , **1r**, **1t**, **1u** were purchased from commercial sources and were used as is. All solvents were distilled before use using standard procedures.

Starting 2-substituted 1,3-dicarbonyl compounds **1a-h**,<sup>2</sup> **1i**,<sup>3</sup> **1j-q**,<sup>4</sup> **1s**<sup>5</sup> are known compounds and were prepared accordingly literature procedures.

## Calculation of the amount of electric current

$$Q = I \cdot t$$

$Q$  - amount of passed electric current, C (Coulomb)

$I$  - electric current, A

$t$  - time, sec

$$Q = I \cdot t = 0.080 \cdot 120 \cdot 60 = 576 \text{ C}$$

$$N = \frac{Q}{F \cdot n_r}$$

$N$  - number of electrons generated in the cell per 1 molecule of dicarbonyl compound, F/mol

$Q$  - amount of electricity passed, C (Coulomb)

$F$  - Faraday constant,  $F = 96485 \text{ (C} \cdot \text{mol}^{-1}\text{)}$

$n_r$  - amount of dicarbonyl compound **1**, mol

$$N = \frac{576}{96485 \cdot 0.001} = 5.97 \frac{\text{F}}{\text{mol}} \approx 6 \frac{\text{F}}{\text{mol}}$$

### General Experimental Procedure for Table 1.

A 20 mL electrolysis cell was charged with 1,3-dicarbonyl compound **1a** (1.0 mmol, 190.2 mg), NH<sub>4</sub>SCN (5.0 mmol, 380.5 mg), and solvent (10 mL). The mixture was stirred for 1-2 minutes to obtain a homogeneous solution. The platinum plate electrodes (2×1.5 cm) were inserted at a distance of 1.5 cm, and the reaction mixture was stirred at a constant current of 80 mA for 2 hours.

*in the case of CH<sub>3</sub>SO<sub>3</sub>H* – Then, H<sub>2</sub>O (30 mL) was added, the mixture was extracted with EtOAc (3×15 mL). The combined organic phase was washed with sat. NaHCO<sub>3</sub> (3×5 mL), dried over MgSO<sub>4</sub>, filtered and concentrated under reduced pressure using a rotary evaporator (15-20 mmHg), (bath temperature, ca. 20–25 °C).

*in the other cases* - the reaction mixture was concentrated under reduced pressure using a rotary evaporator (15-20 mmHg), (bath temperature, ca. 40-50 °C). Then, EtOAc (30 mL) was added, the mixture was washed with H<sub>2</sub>O (3×5 mL), dried over MgSO<sub>4</sub>, filtered and concentrated under reduced pressure using a rotary evaporator (15-20 mmHg), (bath temperature, ca. 20–25 °C).

### General Experimental Procedure for Table 2 (entry 1).

A 20 mL electrolysis cell was charged with 1,3-dicarbonyl compound **1a** (1.0 mmol, 190.2 mg), NH<sub>4</sub>SCN (5.0 mmol, 380.5 mg), and AcOH (10 mL). The mixture was stirred for 1-2 minutes to obtain a homogeneous solution. The platinum plate electrodes (2×1.5 cm) were inserted at a distance of 1.5 cm, and the reaction mixture was stirred at a constant current of 80 mA for 2 hours. Then, the reaction mixture was concentrated under reduced pressure using a rotary evaporator (15-20 mmHg), (bath temperature, ca. 40-50 °C). After that, the reaction mixture was transferred onto SiO<sub>2</sub> chromatographic column and product **2a** was isolated by chromatography on SiO<sub>2</sub> (PE:EtOAc = from 50:1 to 2:1).

### Experimental Procedure for Scheme 2.

A 20 mL electrolysis cell was charged with β-dicarbonyl compound **1** (1.0 mmol), NH<sub>4</sub>SCN (5.0 mmol, 380.5 mg) and AcOH (10 mL). The mixture was stirred for 1-2 minutes to obtain a homogeneous solution. The platinum plate electrodes (2×1.5 cm) were inserted at a distance of 1.5 cm, and the reaction mixture was stirred at a constant current of 80 mA for 2 hours. Then, CH<sub>2</sub>Cl<sub>2</sub> (30 mL) was added, the residue was filtered and washed with CH<sub>2</sub>Cl<sub>2</sub> (2×5 mL). The combined organic phase was concentrated under reduced pressure using a rotary evaporator (15-20 mmHg), (bath temperature, ca. 40-50 °C). Product **2** was isolated by chromatography on SiO<sub>2</sub> (PE:EtOAc = from 50:1 to 2:1).

## Characterization of synthesized thiocyanates

### 3-Benzyl-3-thiocyanatopentane-2,4-dione, 2a (known compound <sup>6</sup>)

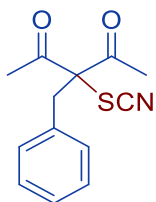

Yield 82% (202.8 mg, 0.82 mmol). Yellow solid, m.p. = 52-53 °C (lit.<sup>6</sup> 53-54 °C).  $R_f$  = 0.30 (PE:EtOAc = 5:1).

$^1\text{H}$  NMR (300.13 MHz,  $\text{CDCl}_3$ ,  $\delta$ ): 7.34 – 7.27 (m, 3H), 7.21 – 7.14 (m, 2H), 3.64 (s, 2H), 2.38 (s, 6H).

$^{13}\text{C}\{^1\text{H}\}$  NMR (75.48 MHz,  $\text{CDCl}_3$ ,  $\delta$ ): 198.3, 133.2, 129.9, 128.9, 128.2, 110.4, 83.0, 37.9, 26.7.

### 3-(4-Methylbenzyl)-3-thiocyanatopentane-2,4-dione, 2b

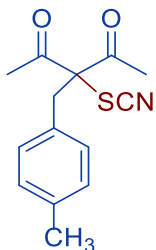

Yield 65% (169.9 mg, 0.65 mmol). Orange solid, m.p. = 91-93 °C.  $R_f$  = 0.17 (PE:EtOAc = 5:1).

$^1\text{H}$  NMR (300.13 MHz,  $\text{CDCl}_3$ ,  $\delta$ ): 7.11 (d,  $J$  = 8.0 Hz, 2H), 7.05 (d,  $J$  = 8.0 Hz, 2H), 3.60 (s, 2H), 2.37 (s, 6H), 2.32 (s, 3H).

$^{13}\text{C}\{^1\text{H}\}$  NMR (75.48 MHz,  $\text{CDCl}_3$ ,  $\delta$ ): 198.4, 138.0, 130.1, 129.7, 129.6, 110.5, 83.1, 37.6, 26.8, 21.2.

HRMS (ESI-TOF)  $m/z$   $[\text{M}+\text{Na}]^+$ . Calcd for  $[\text{C}_{14}\text{H}_{15}\text{NO}_2\text{SNa}]^+$ : 284.0716. Found: 284.0722.

### 3-(4-Chlorobenzyl)-3-thiocyanatopentane-2,4-dione, 2c (known compound <sup>6</sup>)

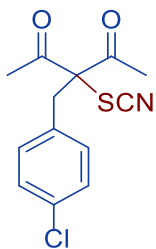

6 F/mol, 5.0 eq.  $\text{NH}_4\text{SCN}$  - Yield 40% (112.7 mg, 0.40 mmol).

8 F/mol, 10.0 eq.  $\text{NH}_4\text{SCN}$  - Yield 51% (143.7 mg, 0.51 mmol).

Orange oil.  $R_f$  = 0.55 (PE:EtOAc = 2:1).

$^1\text{H}$  NMR (300.13 MHz,  $\text{CDCl}_3$ ,  $\delta$ ): 7.28 (d,  $J$  = 8.5 Hz, 2H), 7.11 (d,  $J$  = 8.5 Hz, 2H), 3.60 (s, 2H), 2.37 (s, 6H).

$^{13}\text{C}\{^1\text{H}\}$  NMR (75.48 MHz,  $\text{CDCl}_3$ ,  $\delta$ ): 198.0, 134.3, 131.7, 131.20, 129.1, 110.2, 82.8, 37.3, 26.7.

### 3-Butyl-3-thiocyanatopentane-2,4-dione, 2d

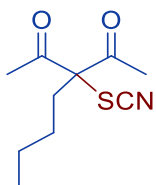

Yield 75% (160.0 mg, 0.75 mmol). Yellow oil.  $R_f$  = 0.31 (PE:EtOAc = 5:1).

$^1\text{H}$  NMR (300.13 MHz,  $\text{CDCl}_3$ ,  $\delta$ ): 2.35 – 2.23 (m, 8H), 1.51 – 1.35 (m, 2H), 1.32 – 1.20 (m, 2H), 0.94 (t,  $J$  = 7.3 Hz, 3H).

$^{13}\text{C}\{^1\text{H}\}$  NMR (75.48 MHz,  $\text{CDCl}_3$ ,  $\delta$ ): 199.0, 110.2, 82.7, 32.0, 26.1, 22.6, 13.8.

HRMS (ESI-TOF)  $m/z$   $[\text{M}+\text{Na}]^+$ . Calcd for  $[\text{C}_{10}\text{H}_{15}\text{NO}_2\text{SNa}]^+$ : 236.0716. Found: 236.0725.

### 3-Hexyl-3-thiocyanatopentane-2,4-dione, 2e (known compound <sup>6</sup>)

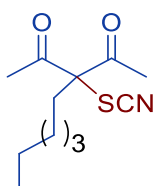

Yield 80% (193.1 mg, 0.80 mmol). Orange oil.  $R_f$  = 0.41 (PE:EtOAc = 5:1).

$^1\text{H}$  NMR (300.13 MHz,  $\text{CDCl}_3$ ,  $\delta$ ): 2.56 – 2.04 (m, 8H), 1.44 – 1.20 (m, 8H), 0.88 (t,  $J$  = 6.5 Hz, 3H).

$^{13}\text{C}\{^1\text{H}\}$  NMR (75.48 MHz,  $\text{CDCl}_3$ ,  $\delta$ ): 199.1, 110.3, 82.7, 32.2, 31.4, 29.1, 26.1, 23.9, 22.6, 14.0.

### 3-Octyl-3-thiocyanatopentane-2,4-dione, 2f

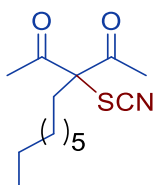

Yield 69% (185.9 mg, 0.69 mmol). Yellow oil.  $R_f$  = 0.15 (PE:EtOAc = 20:1).

$^1\text{H}$  NMR (300.13 MHz,  $\text{CDCl}_3$ ,  $\delta$ ): 2.34 – 2.23 (m, 8H), 1.42 – 1.20 (m, 12H), 0.87 (t,  $J$  = 6.7 Hz, 3H).

$^{13}\text{C}\{^1\text{H}\}$  NMR (75.48 MHz,  $\text{CDCl}_3$ ,  $\delta$ ): 199.0, 110.3, 82.7, 32.2, 31.8, 29.4, 29.23, 29.17, 26.1, 23.9, 22.7, 14.2.

HRMS (ESI-TOF)  $m/z$   $[\text{M}+\text{NH}_4]^+$ . Calcd for  $[\text{C}_{14}\text{H}_{27}\text{N}_2\text{O}_2\text{S}]^+$ : 287.1788. Found: 287.1782.

### 3-/isopentyl-3-thiocyanatopentane-2,4-dione, 2g

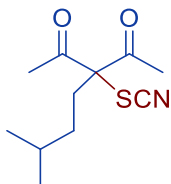

Yield 51% (116.0 mg, 0.51 mmol). Yellow oil.  $R_f$  = 0.23 (PE:EtOAc = 10:1).

$^1\text{H}$  NMR (300.13 MHz,  $\text{CDCl}_3$ ,  $\delta$ ): 2.34 – 2.23 (m, 8H), 1.71 – 1.54 (m, 1H), 1.20 – 1.10 (m, 2H), 0.93 (d,  $J$  = 6.6 Hz, 6H).

$^{13}\text{C}\{^1\text{H}\}$  NMR (75.48 MHz,  $\text{CDCl}_3$ ,  $\delta$ ): 199.0, 110.2, 82.8, 32.8, 30.2, 28.1, 26.1, 22.4.

HRMS (ESI-TOF)  $m/z$   $[\text{M}+\text{Na}]^+$ . Calcd for  $[\text{C}_{11}\text{H}_{17}\text{NO}_2\text{SNa}]^+$ : 250.0872. Found: 250.0879.

### 3-Ethyl-6-methyl-3-thiocyanatoheptane-2,4-dione, 2h

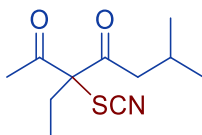

Yield 37% (84.1 mg, 0.37 mmol). Yellow oil.  $R_f$  = 0.18 (PE:EtOAc = 20:1).

$^1\text{H}$  NMR (300.13 MHz,  $\text{CDCl}_3$ ,  $\delta$ ): 2.57 – 2.45 (m, 1H), 2.42 – 2.31 (m, 2.5H), 2.27 (s, 3H), 2.29 – 2.12 (m, 1.5H), 1.00 – 0.87 (m, 9H).

$^{13}\text{C}\{^1\text{H}\}$  NMR (75.48 MHz,  $\text{CDCl}_3$ ,  $\delta$ ): 200.6, 199.2, 110.4, 83.8, 47.3, 26.2, 25.6, 24.1, 22.4, 22.3, 8.3.

HRMS (ESI-TOF)  $m/z$   $[\text{M}+\text{H}]^+$ . Calcd for  $[\text{C}_{11}\text{H}_{18}\text{NO}_2\text{S}]^+$ : 228.1053. Found: 228.1061.

### Ethyl 4-acetyl-5-oxo-4-thiocyanatohexanoate, 2i (known compound <sup>6</sup>)

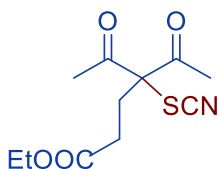

6 F/mol, 5.0 eq.  $\text{NH}_4\text{SCN}$  - Yield 39% (100.3 mg, 0.39 mmol).

8 F/mol, 10.0 eq.  $\text{NH}_4\text{SCN}$  - Yield 40% (103.0 mg, 0.40 mmol).

Yellow oil.  $R_f$  = 0.57 (PE:EtOAc = 2:1).

$^1\text{H}$  NMR (300.13 MHz,  $\text{CDCl}_3$ ,  $\delta$ ): 4.12 (q,  $J$  = 7.1 Hz, 2H), 2.69 – 2.62 (m, 2H), 2.41 – 2.33 (m, 2H), 2.32 (s, 6H), 1.24 (t,  $J$  = 7.1 Hz, 3H).

$^{13}\text{C}\{^1\text{H}\}$  NMR (75.48 MHz,  $\text{CDCl}_3$ ,  $\delta$ ): 198.5, 171.6, 109.7, 81.9, 61.3, 29.1, 27.3, 26.3, 14.3.

### Ethyl 2-benzyl-3-oxo-2-thiocyanatobutanoate, 2j

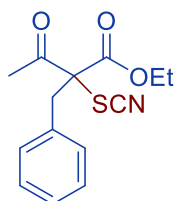

Yield 62% (172.0 mg, 0.62 mmol). Orange solid, m.p. = 74-75 °C.  $R_f$  = 0.22 (PE:EtOAc = 10:1).

$^1\text{H}$  NMR (300.13 MHz,  $\text{CDCl}_3$ ,  $\delta$ ): 7.34 – 7.28 (m, 3H), 7.24 – 7.18 (m, 2H), 4.40 – 4.22 (m, 2H), 3.64 (d,  $J$  = 15.1 Hz, 1H), 3.50 (d,  $J$  = 15.1 Hz, 1H), 2.39 (s, 3H), 1.31 (t,  $J$  = 7.1 Hz, 3H).

$^{13}\text{C}\{^1\text{H}\}$  NMR (75.48 MHz,  $\text{CDCl}_3$ ,  $\delta$ ): 195.7, 166.3, 133.4, 130.1, 128.7, 128.1, 109.9, 73.4, 64.2, 38.6, 25.8, 14.0.

HRMS (ESI-TOF)  $m/z$   $[\text{M}+\text{Na}]^+$ . Calcd for  $[\text{C}_{14}\text{H}_{15}\text{NO}_3\text{SNa}]^+$ : 300.0665. Found: 300.0664.

### Ethyl 2-(4-(*tert*-butyl)benzyl)-3-oxo-2-thiocyanatobutanoate, 2k

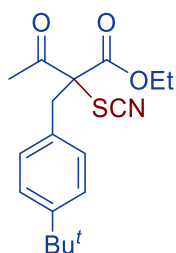

Yield 53% (176.7 mg, 0.53 mmol). Yellow oil.  $R_f$  = 0.29 (PE:EtOAc = 10:1).

$^1\text{H}$  NMR (300.13 MHz,  $\text{CDCl}_3$ ,  $\delta$ ): 7.32 (d,  $J$  = 8.2 Hz, 2H), 7.13 (d,  $J$  = 8.2 Hz, 2H), 4.41 – 4.22 (m, 2H), 3.61 (d,  $J$  = 15.1 Hz, 1H), 3.48 (d,  $J$  = 15.1 Hz, 1H), 2.39 (s, 6H), 1.34 – 1.27 (m, 3H), 1.30 (s, 9H).

$^{13}\text{C}\{^1\text{H}\}$  NMR (75.48 MHz,  $\text{CDCl}_3$ ,  $\delta$ ): 195.9, 166.5, 151.1, 130.3, 129.9, 125.7, 109.9, 73.5, 64.1, 38.3, 34.7, 31.4, 25.9, 14.0.

HRMS (ESI-TOF)  $m/z$   $[\text{M}+\text{NH}_4]^+$ . Calcd for  $[\text{C}_{18}\text{H}_{27}\text{N}_2\text{O}_3\text{S}]^+$ : 351.1737. Found: 351.1742.

### Ethyl 2-(4-fluorobenzyl)-3-oxo-2-thiocyanatobutanoate, 2l

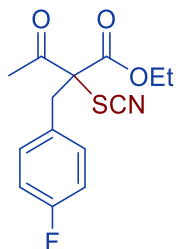

Yield 68% (200.0 mg, 0.68 mmol). Yellow solid, m.p. = 82-84 °C.  $R_f$  = 0.19 (PE:EtOAc = 10:1).

$^1\text{H}$  NMR (300.13 MHz,  $\text{CDCl}_3$ ,  $\delta$ ): 7.23 – 7.12 (m, 2H), 7.05 – 6.94 (m, 2H), 4.40 – 4.22 (m, 2H), 3.61 (d,  $J$  = 15.2 Hz, 1H), 3.47 (d,  $J$  = 15.2 Hz, 1H), 2.39 (s, 3H), 1.31 (t,  $J$  = 7.1 Hz, 3H).

$^{13}\text{C}\{^1\text{H}\}$  NMR (75.48 MHz,  $\text{CDCl}_3$ ,  $\delta$ ): 195.4, 166.2, 162.6 (d,  $J$  = 247.0 Hz), 131.8 (d,  $J$  = 8.1 Hz), 129.2 (d,  $J$  = 3.4 Hz), 115.7 (d,  $J$  = 21.5 Hz), 109.7, 73.3, 64.3, 37.8, 25.8, 14.0.

$^{19}\text{F}$  NMR (282 MHz,  $\text{CDCl}_3$ ,  $\delta$ ): -113.98 (tt,  $J$  = 8.5, 5.3 Hz).

HRMS (ESI-TOF)  $m/z$   $[\text{M}+\text{Na}]^+$ . Calcd for  $[\text{C}_{14}\text{H}_{14}\text{FNO}_3\text{SNa}]^+$ : 318.0571. Found: 318.0564.

#### Ethyl 2-acetyl-2-thiocyanatohexanoate, 2m (known compound <sup>6</sup>)

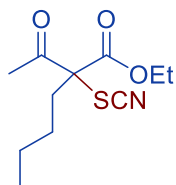

6 F/mol, 5.0 eq.  $\text{NH}_4\text{SCN}$  - Yield 35% (85.2 mg, 0.35 mmol).

8 F/mol, 10.0 eq.  $\text{NH}_4\text{SCN}$  - Yield 37% (90.0 mg, 0.37 mmol).

Yellow oil.  $R_f$  = 0.15 (PE:EtOAc = 20:1).

$^1\text{H}$  NMR (300.13 MHz,  $\text{CDCl}_3$ ,  $\delta$ ): 4.32 (q,  $J$  = 7.1 Hz, 2H), 2.39 – 2.16 (m, 2H), 2.30 (s, 3H), 1.46 – 1.25 (m, 7H), 0.93 (t,  $J$  = 7.1 Hz, 3H).

$^{13}\text{C}\{^1\text{H}\}$  NMR (75.48 MHz,  $\text{CDCl}_3$ ,  $\delta$ ): 197.1, 166.9, 109.8, 73.5, 63.9, 32.6, 26.2, 25.4, 22.5, 13.8.

#### Ethyl 2-acetyl-2-thiocyanatooctanoate, 2n (known compound <sup>6</sup>)

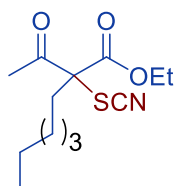

6 F/mol, 5.0 eq.  $\text{NH}_4\text{SCN}$  - Yield 40% (108.6 mg, 0.40 mmol).

8 F/mol, 10.0 eq.  $\text{NH}_4\text{SCN}$  - Yield 44% (119.4 mg, 0.44 mmol).

Yellow oil.  $R_f = 0.18$  (PE:EtOAc = 20:1).

$^1\text{H}$  NMR (300.13 MHz,  $\text{CDCl}_3$ ,  $\delta$ ): 4.32 (q,  $J = 6.9$  Hz, 2H), 2.38 – 2.16 (m, 5H), 1.41 – 1.21 (m, 11H), 0.88 (t,  $J = 6.9$  Hz, 3H).

$^{13}\text{C}\{^1\text{H}\}$  NMR (75.48 MHz,  $\text{CDCl}_3$ ,  $\delta$ ): 197.1, 166.9, 109.8, 73.6, 63.9, 32.9, 31.4, 29.0, 25.4, 24.0, 22.5, 14.1, 14.0.

### Ethyl 2-acetyl-2-thiocyanatoundecanoate, 2o

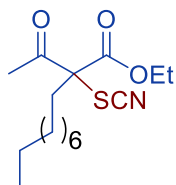

Yield 50% (156.7 mg, 0.50 mmol). Yellow oil.  $R_f = 0.29$  (PE:EtOAc = 10:1).

$^1\text{H}$  NMR (300.13 MHz,  $\text{CDCl}_3$ ,  $\delta$ ): 4.33 (q,  $J = 6.9$  Hz, 2H), 2.42 – 2.15 (m, 5H), 1.44 – 1.22 (m, 17H), 0.87 (t,  $J = 6.9$  Hz, 3H).

$^{13}\text{C}\{^1\text{H}\}$  NMR (75.13 MHz,  $\text{CDCl}_3$ ,  $\delta$ ): 197.2, 167.0, 109.9, 73.6, 63.9, 33.0, 32.0, 29.5, 29.4, 29.3, 25.5, 24.1, 22.8, 14.2, 14.1.

HRMS (ESI-TOF)  $m/z$   $[\text{M}+\text{NH}_4]^+$ . Calcd for  $[\text{C}_{16}\text{H}_{31}\text{N}_2\text{O}_3\text{S}]^+$ : 331.2050. Found: 331.2039.

### Ethyl 2-acetyl-5-methyl-2-thiocyanatohexanoate, 2p

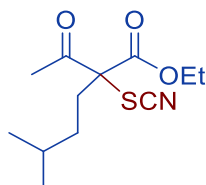

Yield 44% (113.0 mg, 0.44 mmol). Yellow oil.  $R_f = 0.42$  (PE:EtOAc = 10:1).

$^1\text{H}$  NMR (300.13 MHz,  $\text{CDCl}_3$ ,  $\delta$ ): 4.32 (q,  $J = 7.1$  Hz, 2H), 2.38 – 2.14 (m, 5H), 1.69 – 1.53 (m, 1H), 1.31 (t,  $J = 7.1$  Hz, 3H), 1.27 – 1.07 (m, 2H), 0.92 (d,  $J = 6.7$  Hz, 6H).

$^{13}\text{C}\{^1\text{H}\}$  NMR (75.48 MHz,  $\text{CDCl}_3$ ,  $\delta$ ): 197.1, 166.9, 109.8, 73.6, 63.8, 32.8, 30.9, 27.9, 25.4, 22.4, 14.0.

HRMS (ESI-TOF)  $m/z$   $[\text{M}+\text{Na}]^+$ . Calcd for  $[\text{C}_{12}\text{H}_{19}\text{NO}_3\text{SNa}]^+$ : 280.0978. Found: 280.0969.

### Diethyl 2-acetyl-2-thiocyanatopentanedioate, 2q

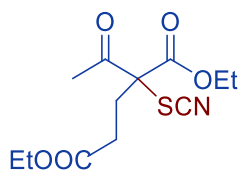

Yield 63% (181.0 mg, 0.63 mmol). Yellow oil.  $R_f = 0.47$  (PE:EtOAc = 5:1).

$^1\text{H}$  NMR (300.13 MHz,  $\text{CDCl}_3$ ,  $\delta$ ): 4.38 – 4.32 (m, 2H), 4.14 (q,  $J$  = 7.2 Hz, 2H), 2.74 – 2.56 (m, 2H), 2.49 – 2.42 (m, 2H), 2.35 (s, 3H), 1.34 (t,  $J$  = 7.2 Hz, 3H), 1.26 (t,  $J$  = 7.2 Hz, 3H).

$^{13}\text{C}\{^1\text{H}\}$  NMR (75.48 MHz,  $\text{CDCl}_3$ ,  $\delta$ ): 196.5, 171.5, 166.4, 109.3, 72.6, 64.3, 61.2, 29.3, 28.2, 25.5, 14.3, 14.0.

HRMS (ESI-TOF)  $m/z$   $[\text{M}+\text{Na}]^+$ . Calcd for  $[\text{C}_{12}\text{H}_{17}\text{NO}_5\text{SNa}]^+$ : 310.0720. Found: 310.0721.

#### Ethyl 2-oxo-1-thiocyanatocyclohexane-1-carboxylate, **2r** (known compound <sup>6</sup>)

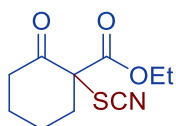

Yield 62% (141.0 mg, 0.62 mmol). Yellow oil.  $R_f$  = 0.33 (PE:EtOAc = 20:1).

$^1\text{H}$  NMR (300.13 MHz,  $\text{CDCl}_3$ ,  $\delta$ ): 4.35 (q,  $J$  = 7.1 Hz, 2H), 3.17 – 3.09 (m, 1H), 2.72 – 2.45 (m, 2H), 2.21 – 1.88 (m, 3H), 1.83 – 1.57 (m, 2H), 1.34 (t,  $J$  = 7.1 Hz, 3H).

$^{13}\text{C}\{^1\text{H}\}$  NMR (75.48 MHz,  $\text{CDCl}_3$ ,  $\delta$ ): 201.1, 166.4, 109.9, 68.5, 63.6, 40.3, 38.3, 26.9, 23.4, 14.0.

#### Ethyl 2-cyano-3-phenyl-2-thiocyanatopropanoate, **2s**

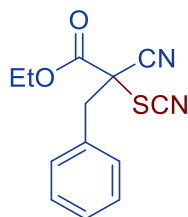

Yield 53% (138.0 mg, 0.53 mmol). Colourless oil.  $R_f$  = 0.35 (PE:EtOAc = 5:1).

$^1\text{H}$  NMR (300.13 MHz,  $\text{CDCl}_3$ ,  $\delta$ ): 7.42 – 7.27 (m, 5H), 4.42 – 4.24 (m, 2H), 3.60 (d,  $J$  = 13.9 Hz, 1H), 3.52 (d,  $J$  = 13.8 Hz, 1H), 1.30 (t,  $J$  = 7.1 Hz, 3H).

$^{13}\text{C}\{^1\text{H}\}$  NMR (75.48 MHz,  $\text{CDCl}_3$ ,  $\delta$ ): 163.12, 131.18, 130.24, 129.30, 129.19, 114.23, 107.16, 65.50, 53.76, 42.96, 13.90.

HRMS (ESI-TOF)  $m/z$   $[\text{M}+\text{K}]^+$ . Calcd for  $[\text{C}_{13}\text{H}_{12}\text{N}_2\text{O}_2\text{SK}]^+$ : 299.0251. Found: 299.0251.

## CV study

Cyclic voltammetry (CV) was implemented on an IPC-Pro M computer-assisted potentiostat manufactured by «Econix» (scan rate error 1.0%). The starting potential was set to 0.25 mV, and the initial sweep was carried out in the positive (anode) region at a rate of 100 mV/s. Analyzed solutions were prepared in acetonitrile and contained *n*-Bu<sub>4</sub>NBF<sub>4</sub> (0.1 M) as a supporting electrolyte and analyte (0.05 M). The experiments were performed in a 10 mL five-neck glass conic electrochemical cell with a water jacket for thermostating. CV curves were recorded using a three-electrode scheme. In a typical case, 10 mL of a solution was utilized. The working electrode was a disc glassy-carbon electrode (*d* = 3 mm, surface area ~0.07 cm<sup>2</sup>). A platinum wire served as an auxiliary electrode. An Ag/AgNO<sub>3</sub> electrode was used as the reference electrode and was linked to the solution by a porous glass diaphragm. The solutions were kept under thermally controlled conditions at 15±0.5 °C and deaerated by bubbling argon. Electrochemical experiments were performed under an argon atmosphere. The working electrode was polished with figure-eight motions on a synthetic chamois leather pad using a Cr<sub>2</sub>O<sub>3</sub>-based polishing paste (~5 µm particle size) down to the mirror-like surface, and rinsed with acetonitrile. Polishing was carried before each recording of CV curve.

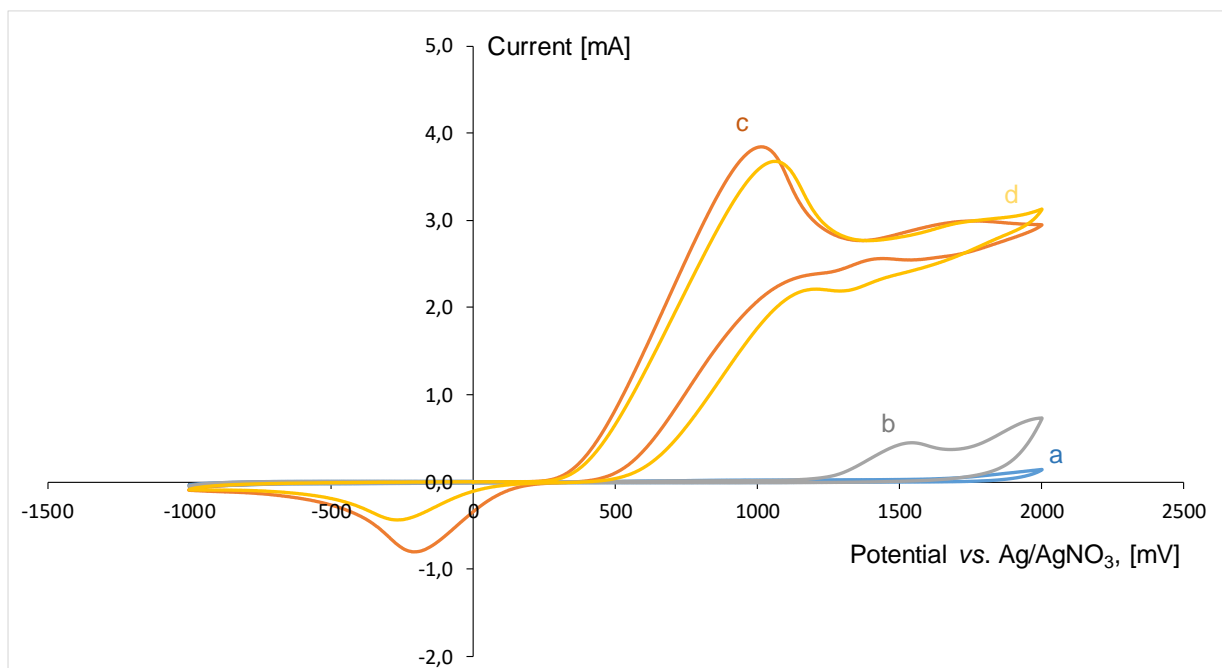

**Figure 1.** CV curve for on a working disc glassy-carbon electrode (*d* = 3 mm) under a scan rate of 0.1 V/s for (a) background, (b) **1a** (0.05 M), (c) NH<sub>4</sub>SCN (0.25 M), (d) mixture **1a** (0.05 M) with NH<sub>4</sub>SCN (0.25 M) in 0.1 M *n*-Bu<sub>4</sub>NBF<sub>4</sub> in CH<sub>3</sub>CN/HCOOH (8/2).

### Experimental procedures for Scheme 3. Control experiments.

**a. Undivided cell:** A 20 mL electrolysis cell was charged with 1,3-dicarbonyl compound **1a** (1.0 mmol, 190.2 mg), NH<sub>4</sub>SCN (5.0 mmol, 380.5 mg) and 10 mL of AcOH. The mixture was stirred for 1-2 minutes to obtain a homogeneous solution. The platinum plate electrodes (2×1.5 cm) were inserted at a distance of 1.5 cm, and the reaction mixture was stirred at 40 °C at a constant current of 10 mA for 16 hours. Then, the reaction mixture was concentrated under reduced pressure using a rotary evaporator (15-20 mmHg), (bath temperature, ca. 40-50 °C). After that the reaction mixture was transferred onto SiO<sub>2</sub> chromatographic column and product **2a** was isolated by chromatography on SiO<sub>2</sub> (PE:EtOAc = from 50:1 to 2:1).

**Divided cell:** A divided cell was equipped with a platinum plate anode (2×1.5 cm) and a platinum plate cathode (2×1.5 cm) and connected to a DC regulated power supply. The solution of 1,3-dicarbonyl compound **1a** (1 mmol, 190.2 mg), NH<sub>4</sub>SCN (5.0 mmol, 380.5 mg) in AcOH (10 mL) (anode compartment) and solution of NH<sub>4</sub>SCN (5.0 mmol, 380.5 mg) in AcOH (10 mL) (cathode compartment) were electrolyzed using constant current conditions  $I = 10 \text{ mA}$  (3.0-3.5 mA/cm<sup>2</sup>) at 40 °C under magnetic stirring (6 F/mol, 16 hours). The combined organic phases (anodic and cathode compartments) were concentrated under reduced pressure using a rotary evaporator (15-20 mmHg), (bath temperature, ca. 20-25 °C). After that the reaction mixture was transferred onto SiO<sub>2</sub> chromatographic column and product **2a** was isolated by chromatography on SiO<sub>2</sub> (PE:EtOAc = from 50:1 to 2:1).

**b. Experiment with pre-synthesized thiocyanogen:**

KSCN (5.0 mmol, 485.9 mg) was added while stirring in 5 mL of the solvent (AcOH, CH<sub>3</sub>OH, or CH<sub>3</sub>CN). After dissolution of salt, Br<sub>2</sub> (2.5 mmol, 399.5 mg, 128.8 µL) was added and the mixture was stirred for 10 minutes at 20-25 °C. A solution of 1,3-dicarbonyl compound **1a** (1 mmol, 190.2 mg) in the solvent (AcOH, CH<sub>3</sub>OH, or CH<sub>3</sub>CN) (5 mL) was added to a yellow reaction mixture. *In the experiments 4-6 AcONH<sub>4</sub> (5.0 mmol, 385.4 mg) was also added.* The resulting reaction mixture was stirred at 40 °C for 2 hours. Then, the organic phase was concentrated under reduced pressure using a rotary evaporator (15-20 mmHg), (bath temperature, ca. 40-50 °C). After that, the reaction mixture was transferred onto SiO<sub>2</sub> chromatographic column and product **2a** was isolated by chromatography on SiO<sub>2</sub> (PE:EtOAc = from 50:1 to 2:1).

### Bioassay of fungicidal activity

The antifungal activities were tested according to the conventional procedure<sup>7-9</sup> with six phytopathogenic fungi from different taxonomic classes: *Fusarium culmorum* (F.c.), *Rhizoctonia solani* (R.s.), *Alternaria solani* (A.s.), *Phytophthora infestans* (P.i.), and *Colletotrichum coccodes* (C.c.). The effect of the chemicals on mycelial radial growth was determined by dissolving concentration 3 mg×mL<sup>-1</sup> in acetone and suspending aliquots in potato-saccharose agar at 50 °C to give the concentration 30 µg×mL<sup>-1</sup>. The final acetone concentration of both fungicide-containing and control samples was 10 mL×L<sup>-1</sup>. Petri dishes containing 15 mL of the agar medium were inoculated by placing 2-mm micelial agar discs on the agar surface. Plates were incubated at 25 °C and radial growth was measured after 5 days. The mixed medium without a sample was used as the blank control. Three replicates of each test were carried out. The mycelium elongation diameter (mm) of fungi settlements was measured after 5 days of culture. The growth inhibition rates were calculated with the following equation:  $I = [(DC - DT)/DC] \times 100\%$ . Here I is the growth inhibition rates (%), DC is the control settlement diameter (mm), and DT is the treatment group fungi settlement diameter (mm). The results are summarized in Table 3.

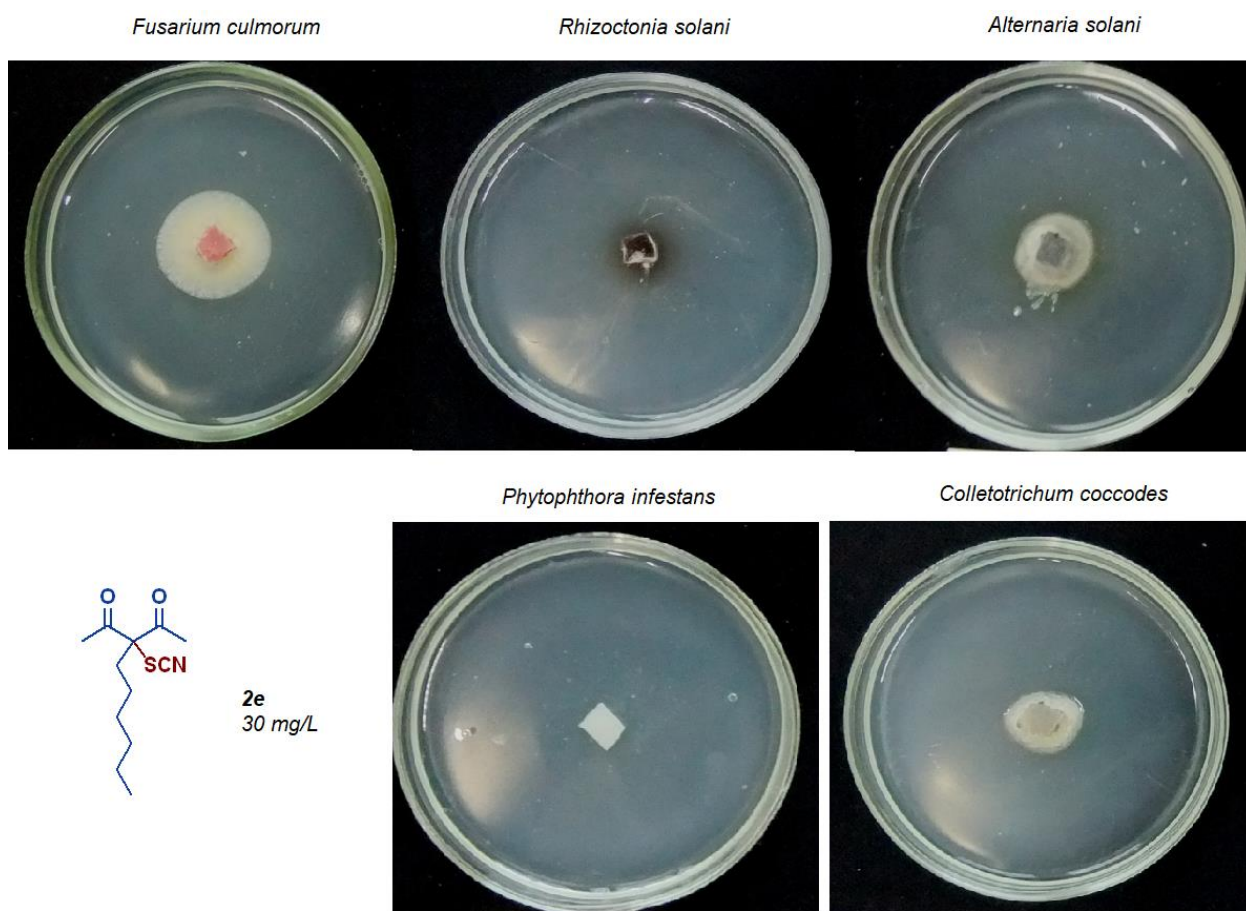

**Figure S2.** The fungicidal activity of synthesized thiocyanate **2e**.

## Translaminar activity study

The translaminar activities were tested according to the conventional procedure.<sup>10-13</sup>

### *Chemicals and formulations*

The leader compound **2e** was compared with fluazinam (Shirlan, Syngenta, 0.4 L/ga) as a well-known contact fungicide.<sup>14-17</sup> The final fluazinam concentration was 2.0 g/L. Compound **2e** was formulated as 0.17 g/L solution in distilled water with the addition of 1 mL/L commercial adjuvant (Atomic) (application rate 30 g/ga).

### *Plants*

Potato leaves (*Solanum tuberosum*, Arizona) were separated from plants grown in the field and brought to the laboratory for testing. One fully-expanded leaves per plant were treated and in total 10 plants were used per fungicide treatment.

### *Pathogens and inoculation*

An isolate of *P. infestans* M.(161), maintained on plants in our laboratory (VNIIF, Russia), were used in this study. The pathogens were 10 day-age. Concentration of isolate *P. infestans* suspension was 20000 conidium/mL.

### *Translaminar activity*

To study translaminar activity, compound **2e** and fluazinam were sprayed 24 h before the inoculation of the plants, on the adaxial (upper) leaf surface. Fungicide solutions were applied to “run-off” with a hand sprayer. Control seedling plants were sprayed with sterile tap water 24 h before the inoculation. After 24 h fungicide treated leaves were inoculated on the abaxial (lower) surface. A similar set of plants and leaves was treated with the same fungicides on the abaxial (lower) leaf surface and inoculated 24 h later on the same leaf surface. Inoculum on the leaves in the form of a suspension of conidia was applied locally (1-2 drops per leaf). We used a microdispenser that allows you to apply drops of 10 µL. The inoculated leaves were kept for 18 hours in a humid chamber in the dark. Then the remains of the suspension are removed from the leaves with filter paper and again placed in a humid chamber at a temperature of 20 °C. On the fourth day, the diameter of necrosis is measured, in mm. The productivity of sporulation on *P. infestans* - affected spots was assessed in points on the fifth day.<sup>18</sup>

**Table S2.** Severity of potato blight developed on potato leaves treated with fungicides on the adaxial (upper) or the abaxial (lower) leaf surface and inoculated on the abaxial (lower) leaf surface.

| № | Fungicide treatment        | Application dose (mg/mL) | Abaxial leaf surface treatment   |        | Adaxial leaf surface treatment   |        |
|---|----------------------------|--------------------------|----------------------------------|--------|----------------------------------|--------|
|   |                            |                          | Average spot growth diameter, mm | Points | Average spot growth diameter, mm | Points |
| 1 | <b>2e</b>                  | 0.17                     | 9.8                              | 4.8    | 21.2                             | 10.8   |
| 2 | fluazinam                  | 2.0                      | 0.5                              | 0      | 8.6                              | 4.8    |
| 3 | Control (H <sub>2</sub> O) |                          | 22.8                             | 11.4   | 23.8                             | 11.4   |
|   | HCP <sub>0,95</sub>        |                          | 2.8                              | 1.3    | 2.5                              | 1.2    |

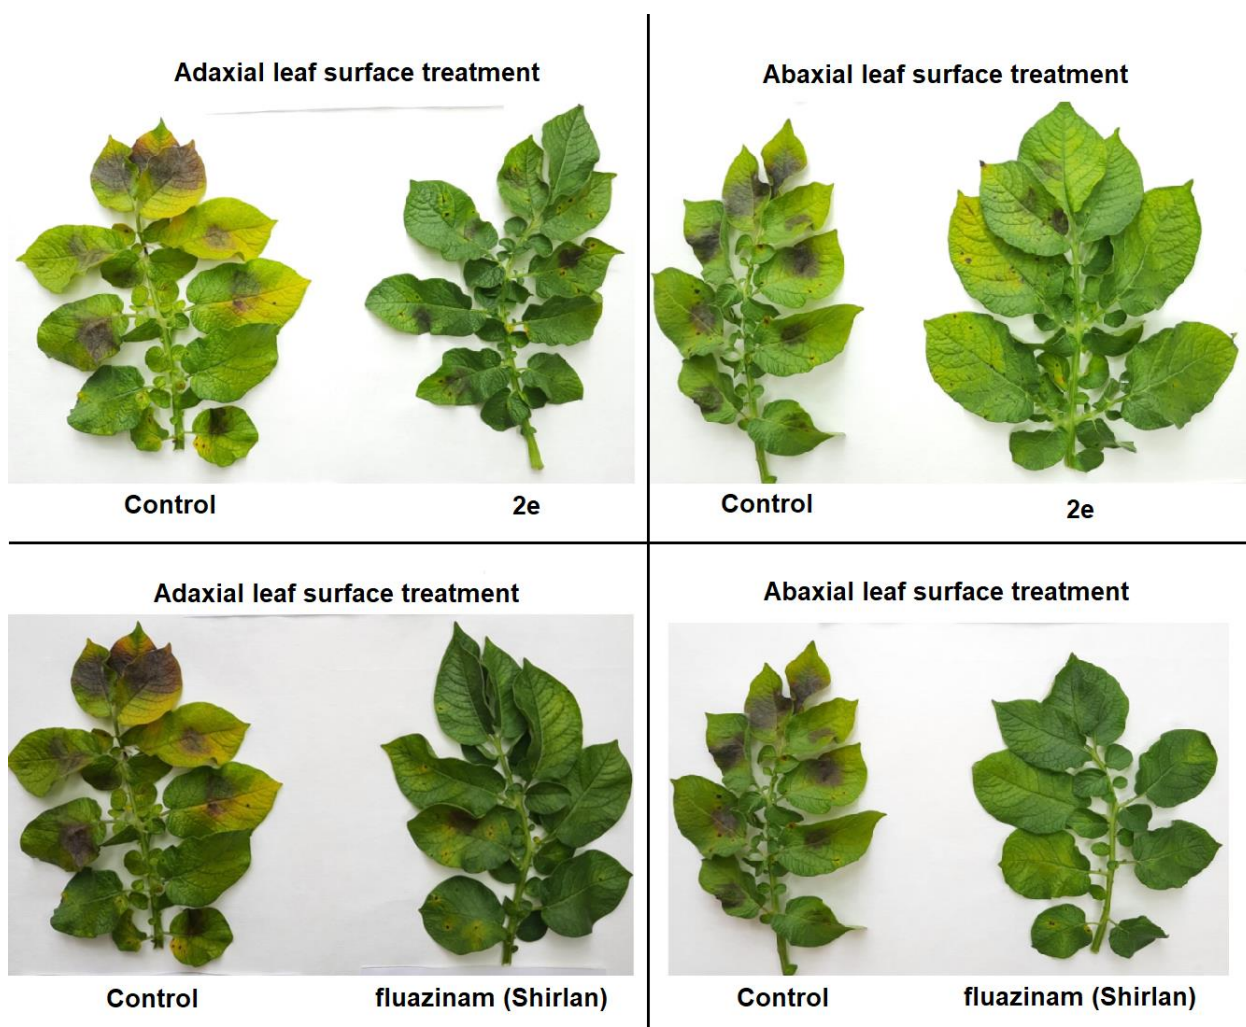

**Figure S3.** Late blight on the leaves on the 4th day after infection.

## References

1. A. M. Tsedilin, A. N. Fakhrutdinov, D. B. Eremin, S. S. Zalesskiy, A. O. Chizhov, N. G. Kolotyrkina and V. P. Ananikov, *Mendeleev Commun.*, 2015, **25**, 454-456.
2. D. Kalaitzakis, J. D. Rozzell, I. Smonou and S. Kambourakis, *Adv. Synth. Catal.*, 2006, **348**, 1958-1969.
3. W. P. Unsworth, G. Coulthard, C. Kitsiou and R. J. K. Taylor, *J. Org. Chem.*, 2014, **79**, 1368-1376.
4. V. A. Vil', G. d. P. Gomes, M. V. Ekimova, K. A. Lyssenko, M. A. Syroeshkin, G. I. Nikishin, I. V. Alabugin and A. O. Terent'ev, *J. Org. Chem.*, 2018, **83**, 13427-13445.
5. A. S. Sarac, S. E. Ozgul, H. Faltz, A. Gencturk, H.-D. Gilsing and B. Schulz, *Journal of Nanoscience and Nanotechnology*, 2010, **10**, 8043-8053.
6. A. O. Terent'ev, M. Y. Sharipov, A. P. Glinuskin, I. B. Krylov, D. V. Gaidarenko and G. I. Nikishin, *Mendeleev Commun.*, 2016, **26**, 226-227.
7. Metodicheskie rekomendatsii po opredeleniyu fungitsidnoi aktivnosti novykh soedinenii, NIITEKhIM, Cherkassy, 1984, pp. 32 (in Russian).
8. S. V. Popkov, L. V. Kovalenko, M. M. Bobylev, O. Y. Molchanov, M. Z. Krimer, V. P. Tashchi and Y. G. Putsykin, *Pesticide Science*, 1997, **49**, 125-129.
9. H. Itoh, H. Kajino, T. Tsukiyama, J. Tobitsuka, H. Ohta, Y. Takahi, M. Tsuda and H. Takeshiba, *Bioorg. Med. Chem.*, 2002, **10**, 4029-4034.
10. D. A. Karadimos, G. S. Karaoglanidis and K. Tzavella-Klonari, *Crop Prot.*, 2005, **24**, 23-29.
11. S. Mitani, S. Araki, T. Yamaguchi, Y. Takii, T. Ohshima and N. Matsuo, *Pest Manag. Sci.*, 2002, **58**, 139-145.
12. Y. Cohen and U. Gisi, *Phytopathology*®, 2007, **97**, 1274-1283.
13. J. Sudisha, K. N. Amruthesh, S. A. Deepak, N. P. Shetty, B. R. Sarosh and H. S. Shetty, *Pestic. Biochem. Physiol.*, 2005, **81**, 188-197.
14. Y.-L. Chen, X.-W. Mao, J.-X. Wang, L.-Y. Wu, M.-G. Zhou and Y.-P. Hou, *Pestic. Biochem. Physiol.*, 2018, **148**, 8-15.
15. Y.-P. Hou, X.-W. Mao, L.-Y. Wu, J.-X. Wang, B. Mi and M.-G. Zhou, *Pestic. Biochem. Physiol.*, 2019, **155**, 81-89.
16. W. W. Kirk, F. M. Abu-El Samen, J. B. Muhinyuza, R. Hammerschmidt, D. S. Douches, C. A. Thill, H. Groza and A. L. Thompson, *Crop Prot.*, 2005, **24**, 961-970.
17. D. Ruano-Rosa, I. Arjona-Girona and C. J. López-Herrera, *Crop Prot.*, 2018, **112**, 363-370.
18. J. G. Horsfall and R. W. Barrat, *Phytopathology*, 1945, **35**, 655.

# NMR spectra of synthesized thiocyanates

$^1\text{H}$  NMR (300.13 MHz,  $\text{CDCl}_3$ ) spectrum of 3-benzyl-3-thiocyanatopentane-2,4-dione, **2a**

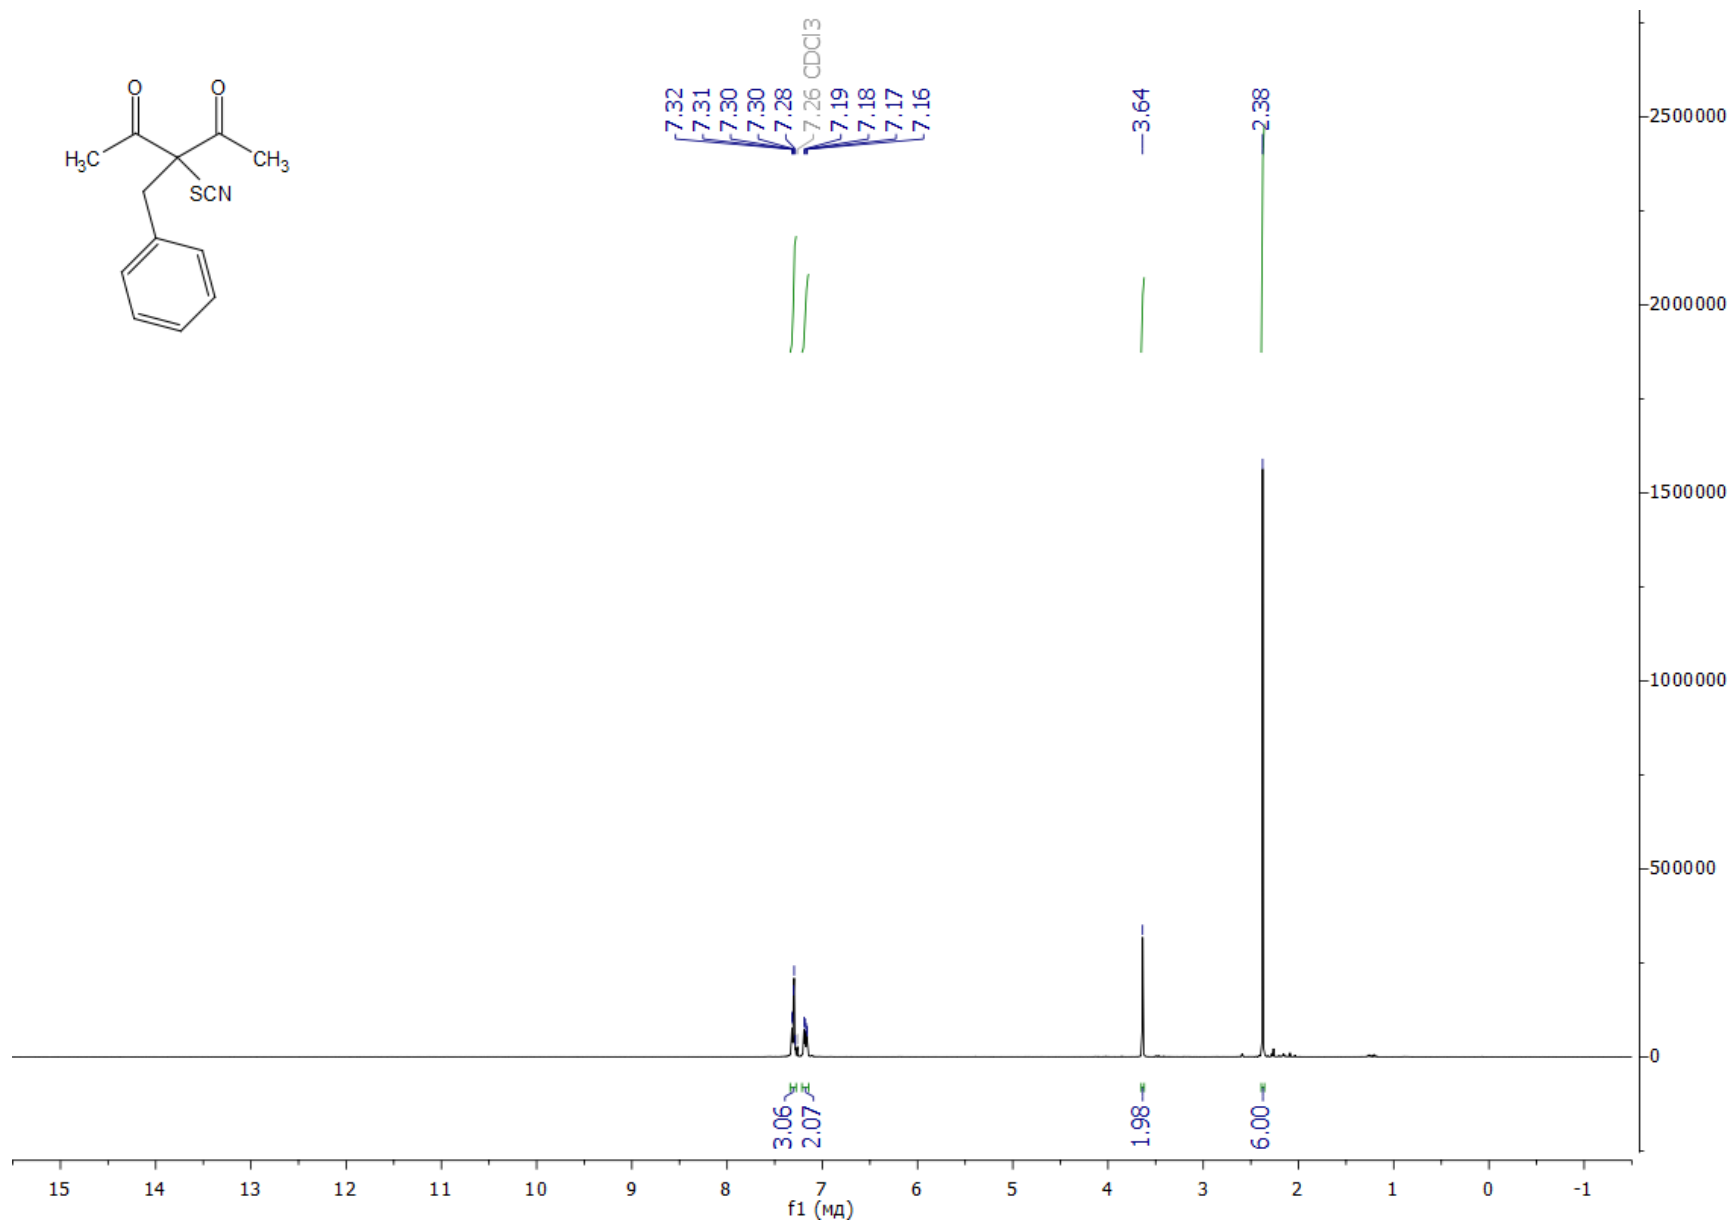

$^{13}\text{C}$  NMR (75.48 MHz,  $\text{CDCl}_3$ ) spectrum of 3-benzyl-3-thiocyanatopentane-2,4-dione, **2a**

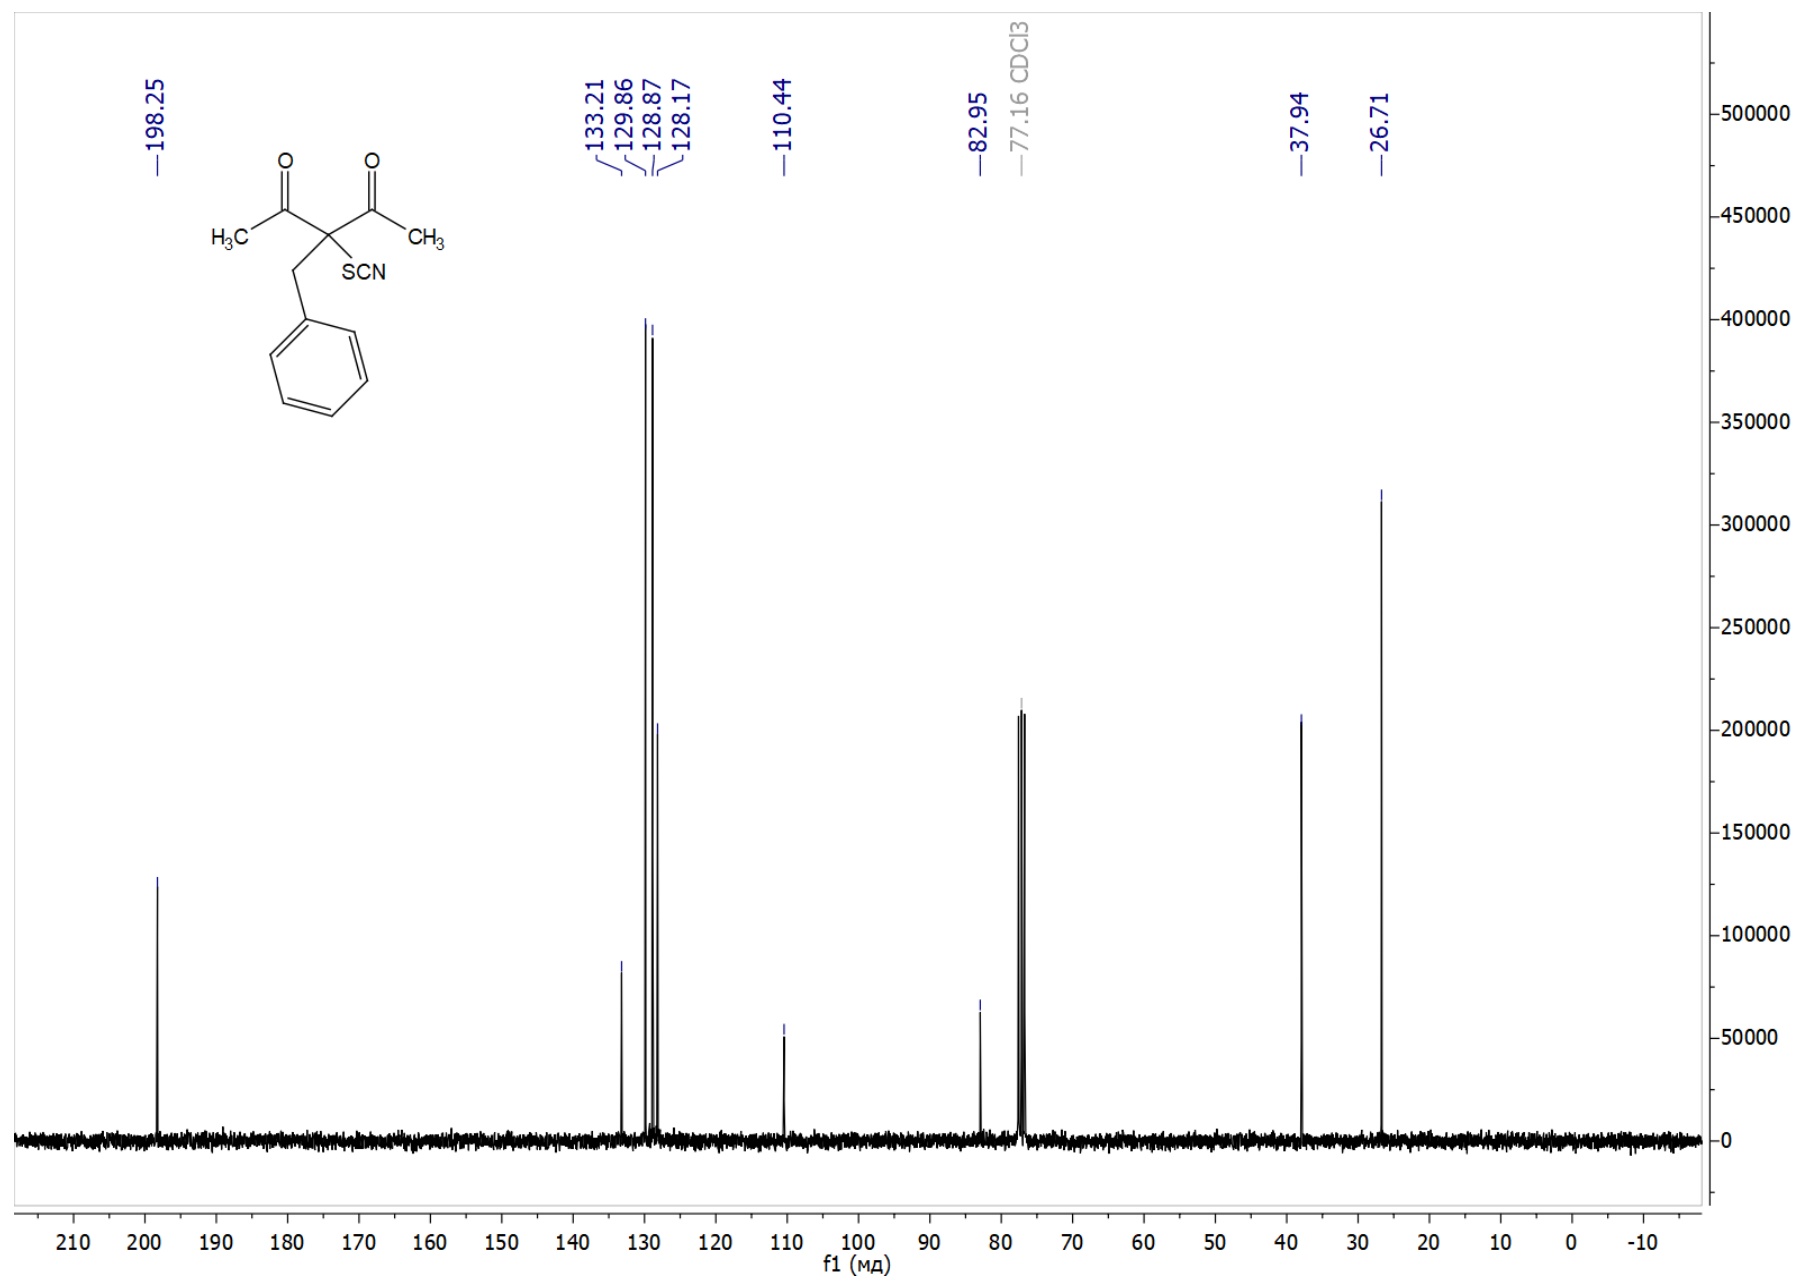

<sup>1</sup>H NMR (300.13 MHz, CDCl<sub>3</sub>) spectrum of 3-(4-methylbenzyl)-3-thiocyanatopentane-2,4-dione, **2b**

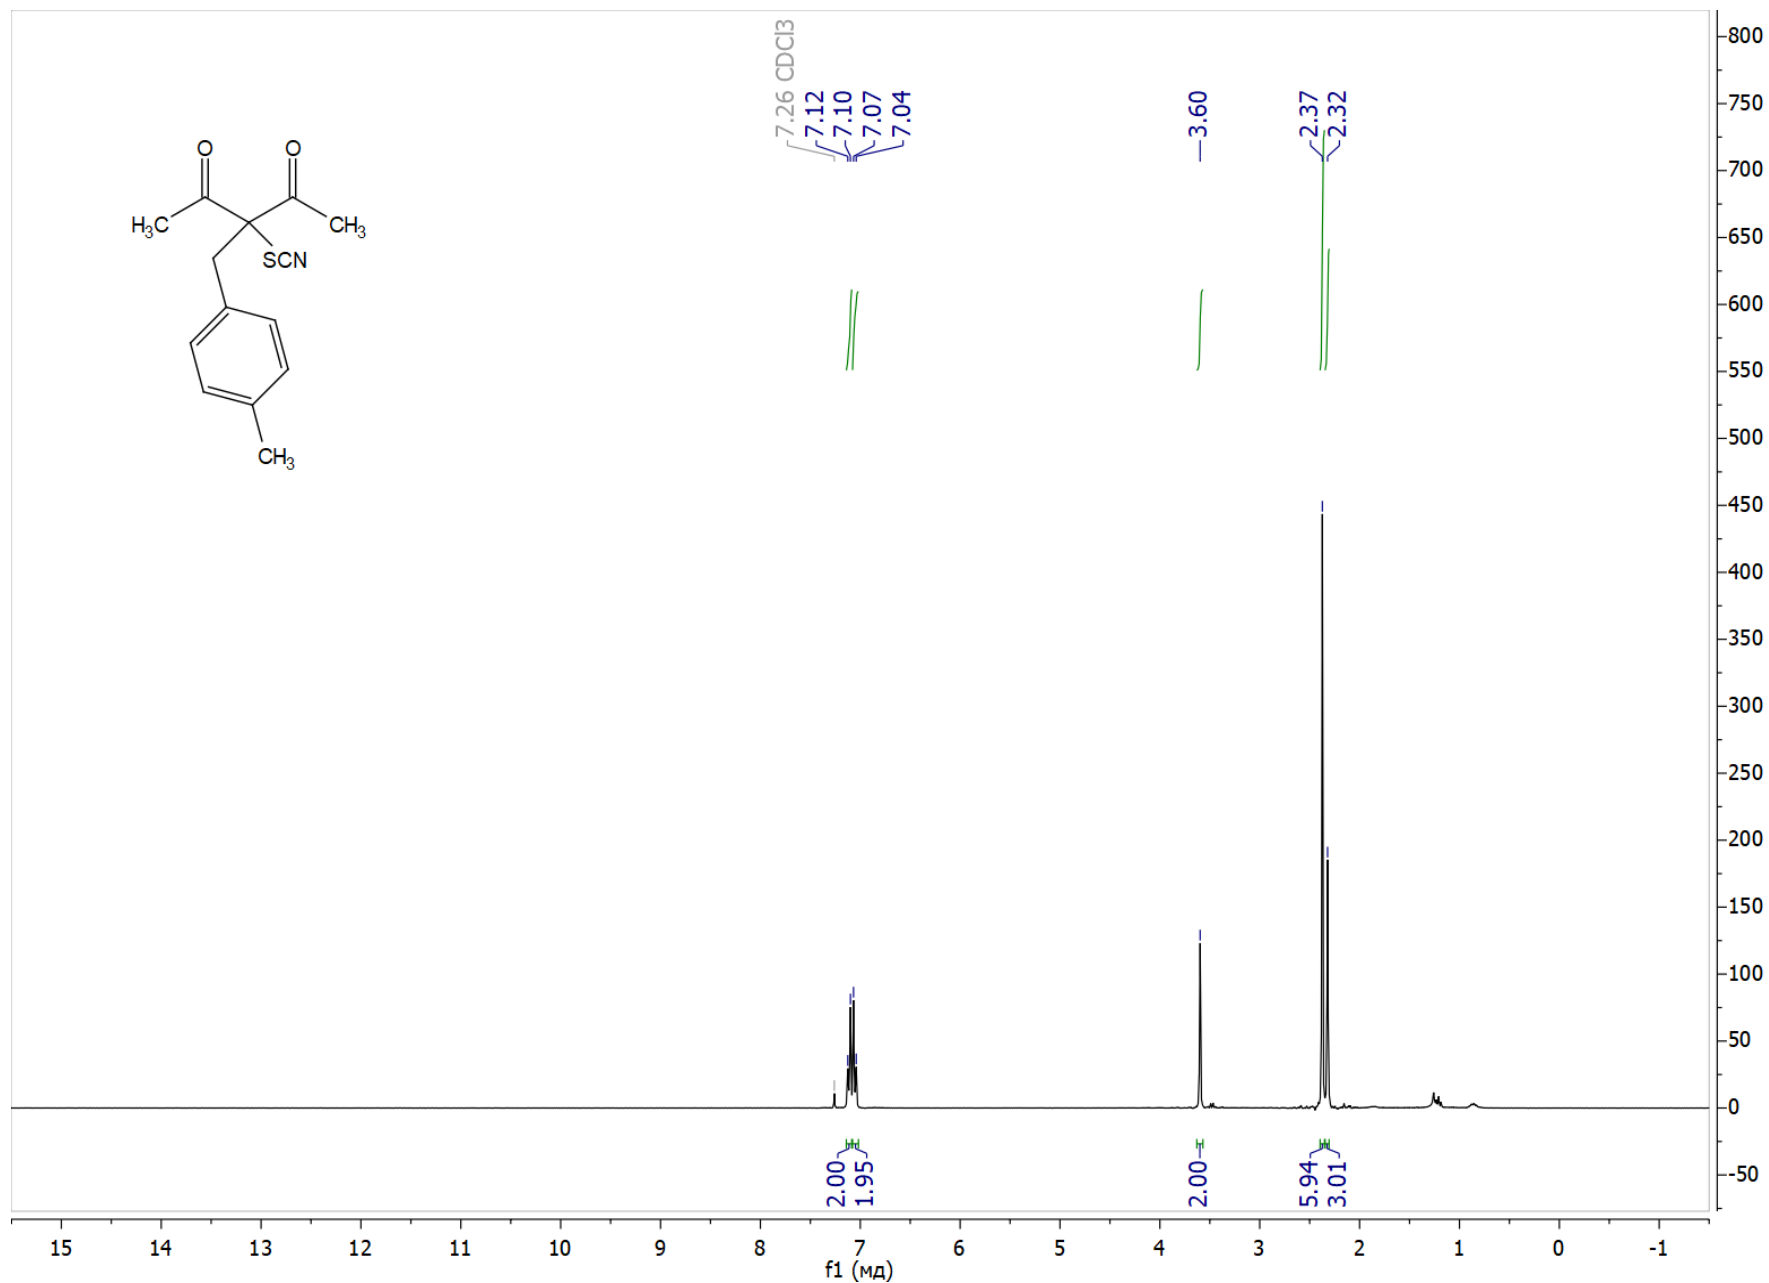

$^{13}\text{C}$  NMR (75.48 MHz,  $\text{CDCl}_3$ ) spectrum of 3-(4-methylbenzyl)-3-thiocyanatopentane-2,4-dione, **2b**

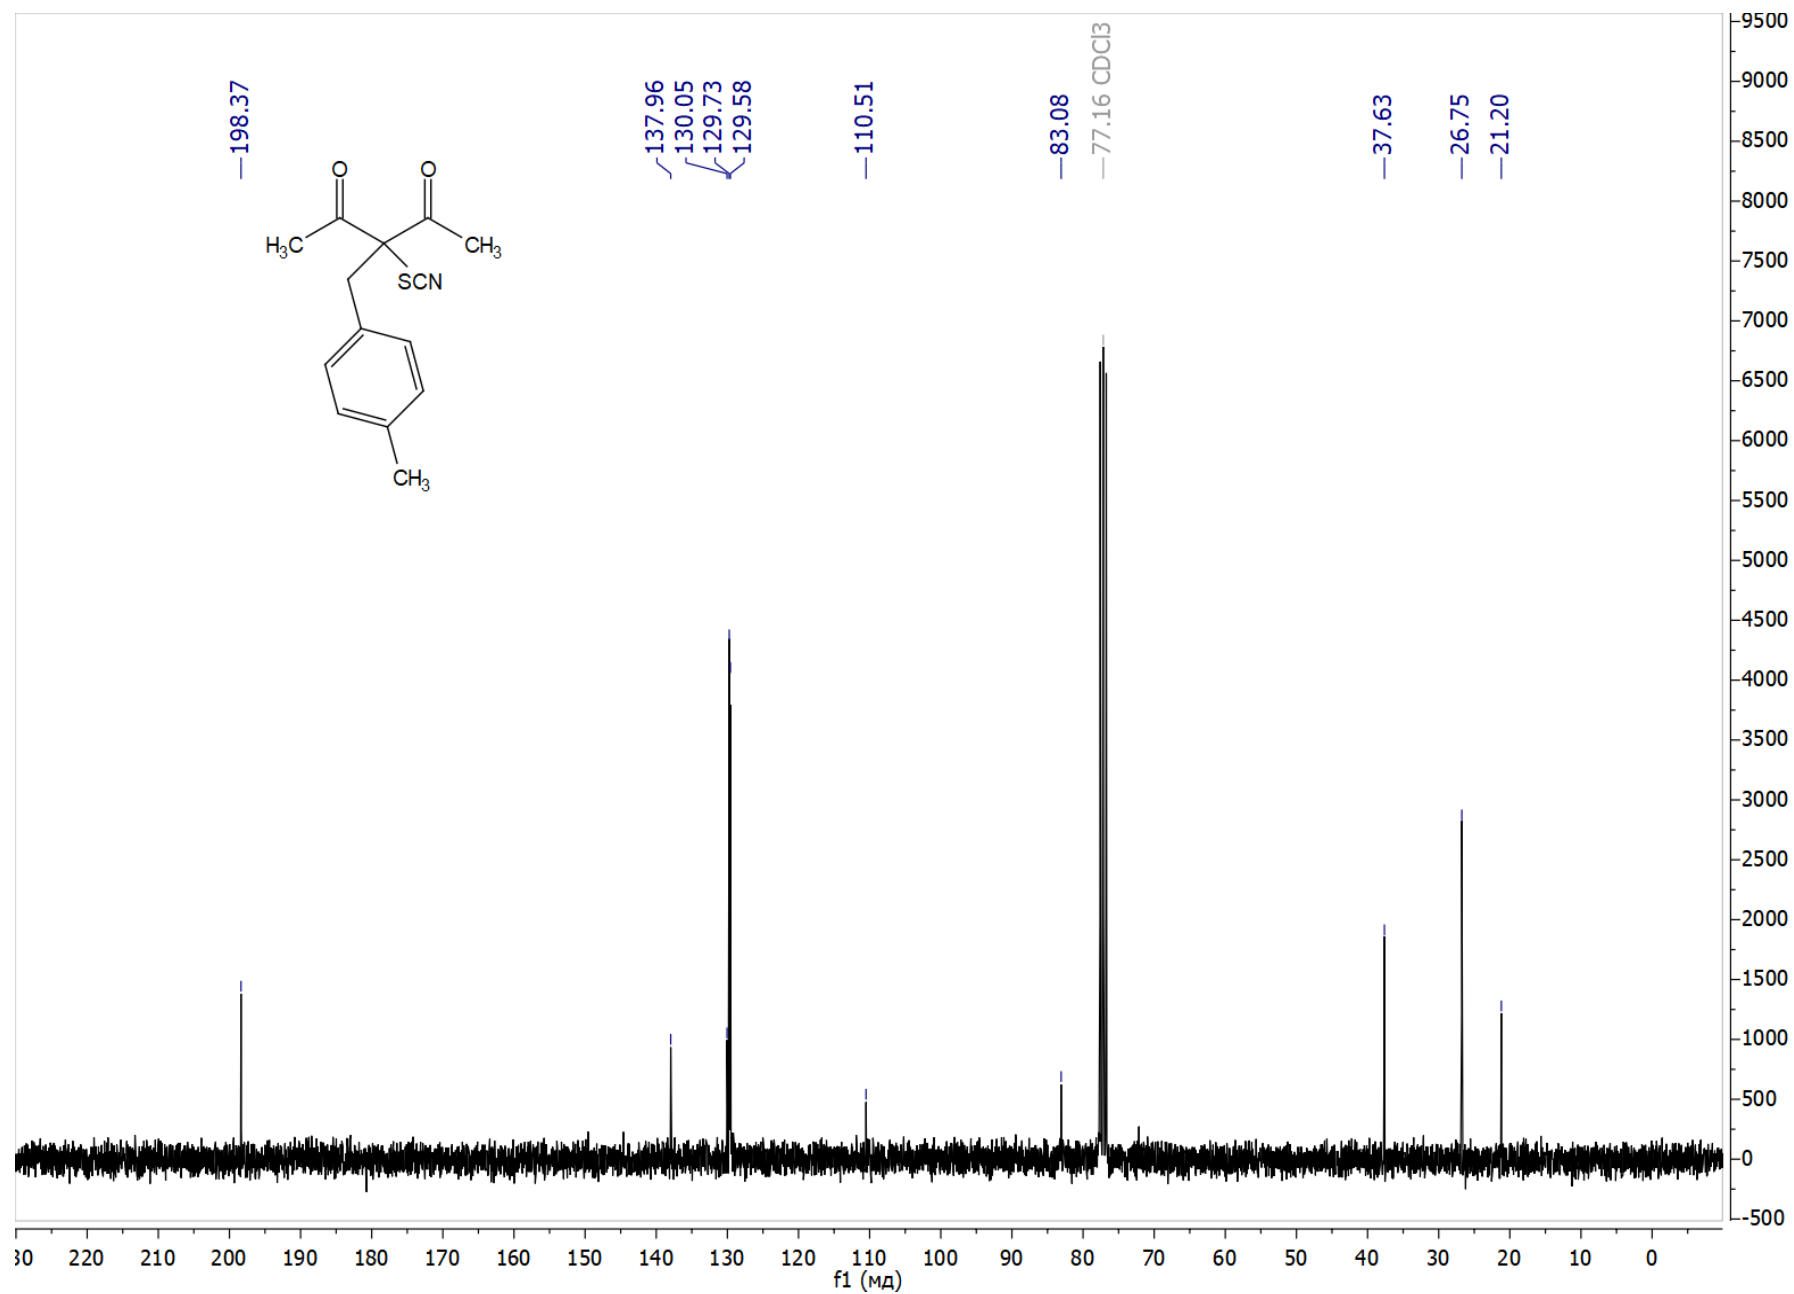

S20

<sup>1</sup>H NMR (300.13 MHz, CDCl<sub>3</sub>) spectrum of 3-(4-chlorobenzyl)-3-thiocyanatopentane-2,4-dione, **2c**

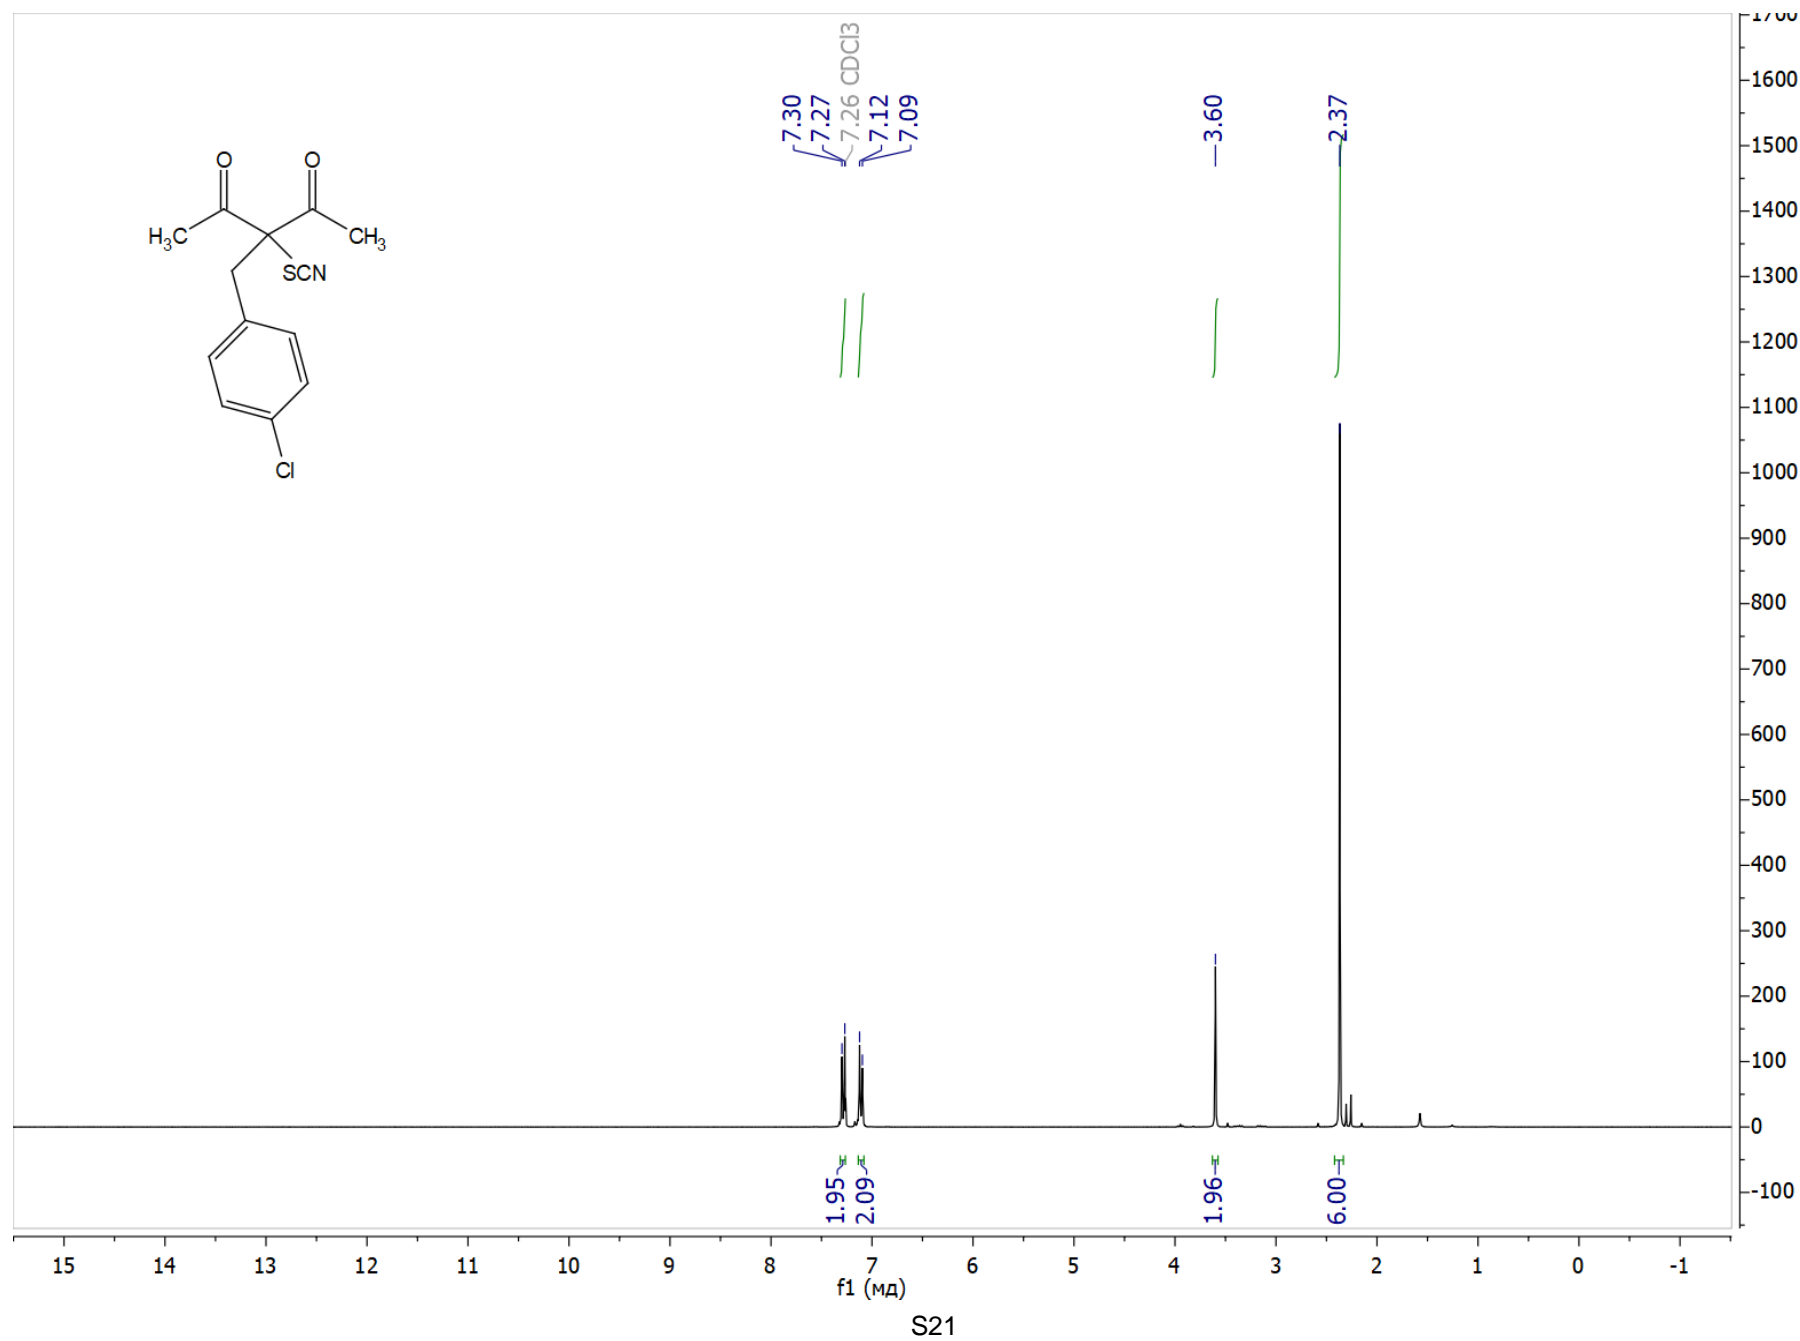

$^{13}\text{C}$  NMR (75.48 MHz,  $\text{CDCl}_3$ ) spectrum of 3-(4-chlorobenzyl)-3-thiocyanatopentane-2,4-dione, **2c**

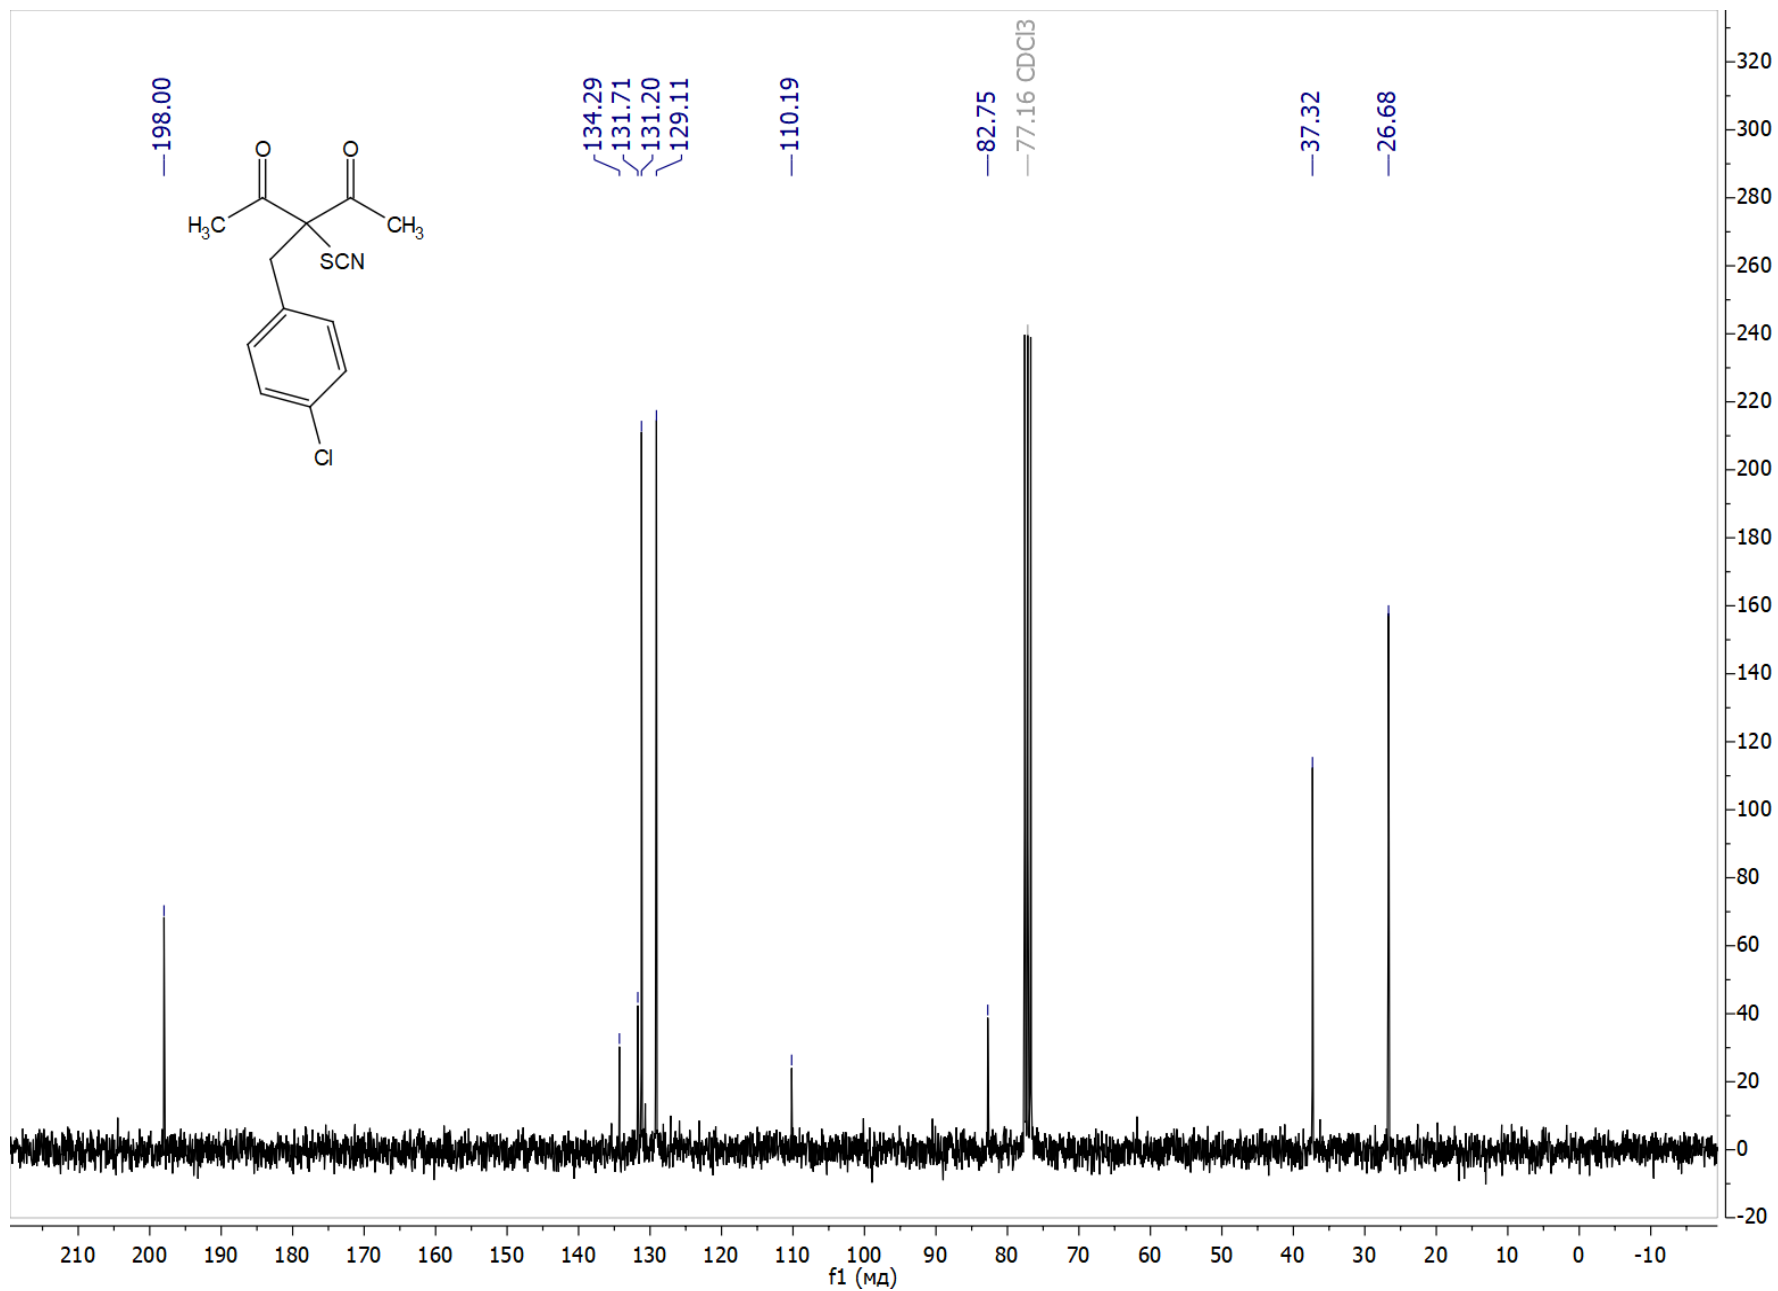

S22

<sup>1</sup>H NMR (300.13 MHz, CDCl<sub>3</sub>) spectrum of 3-butyl-3-thiocyanatopentane-2,4-dione, **2d**

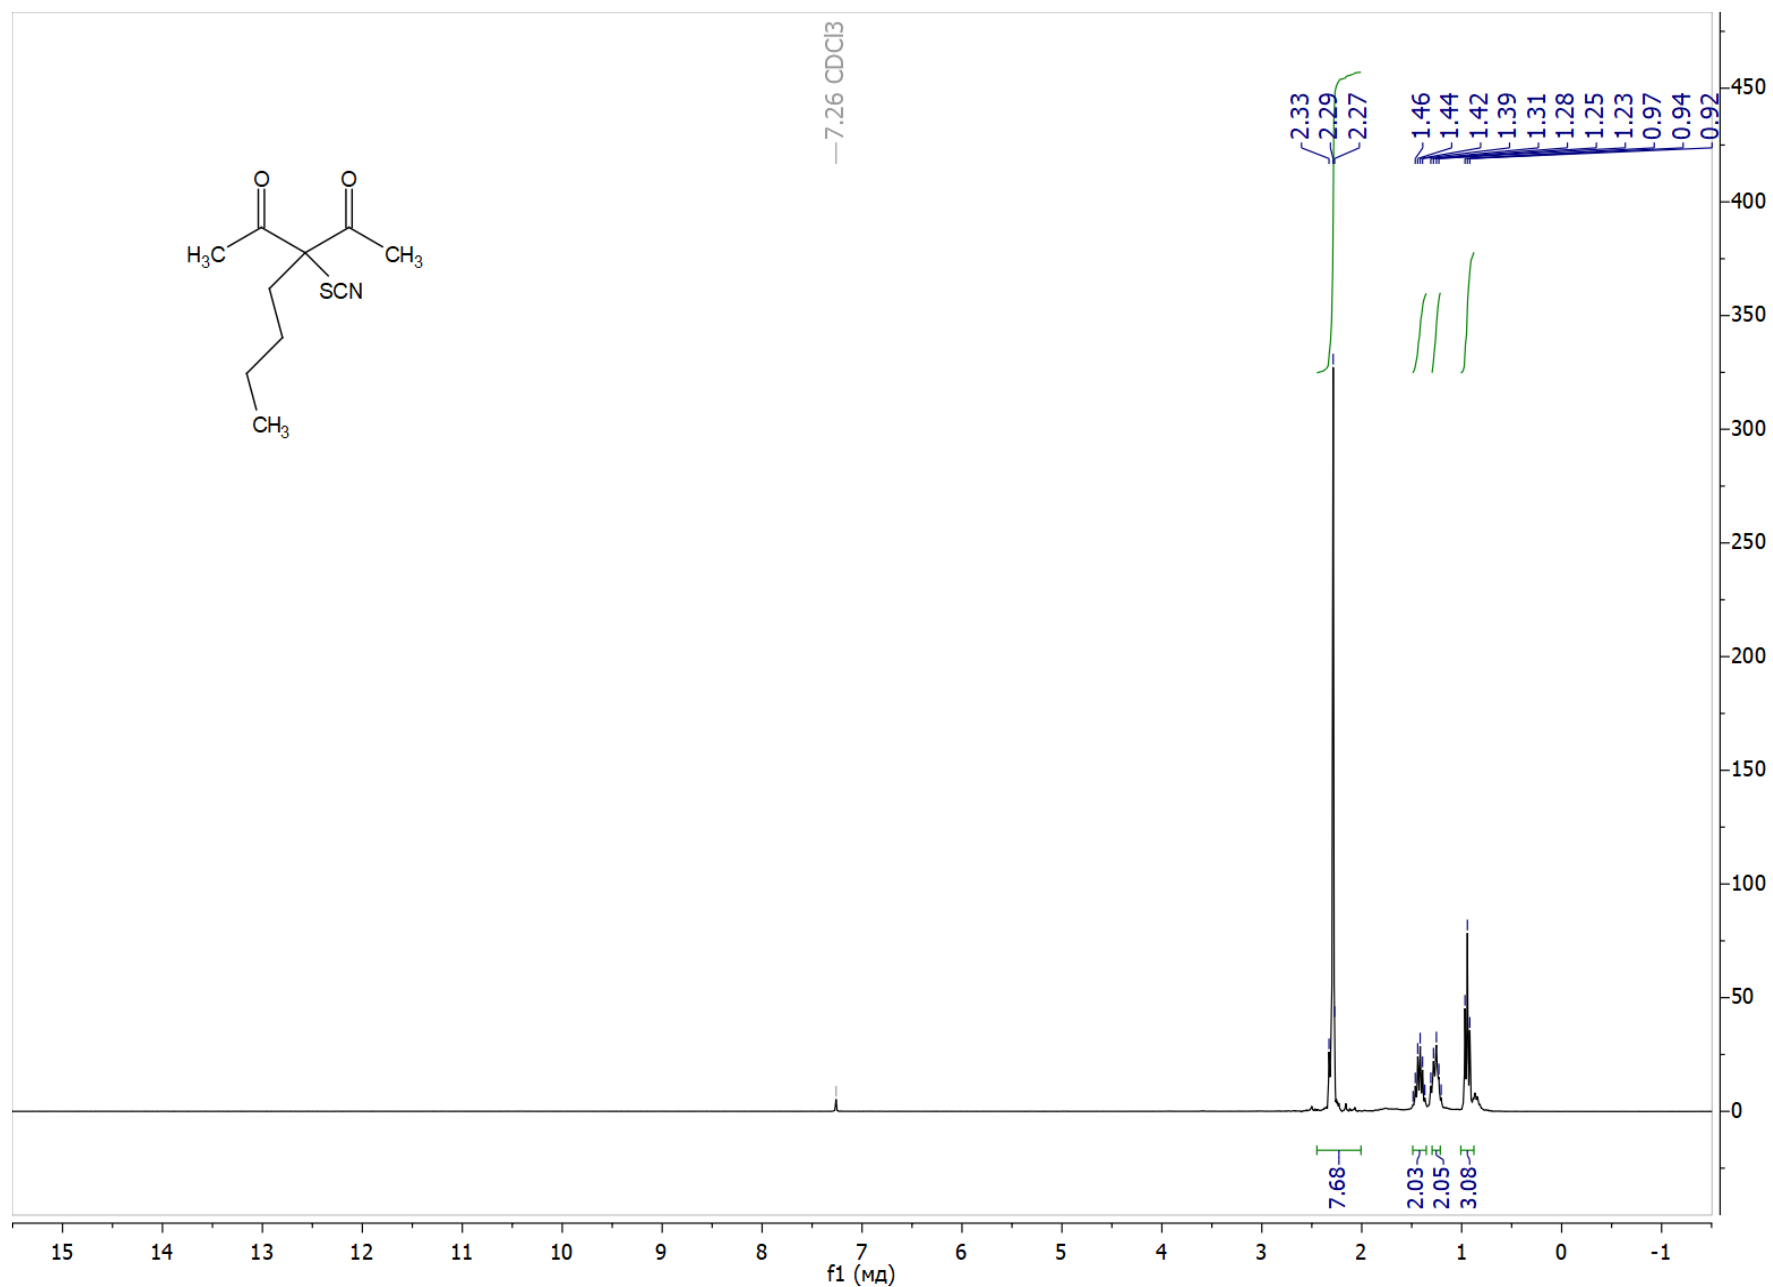

$^{13}\text{C}$  NMR (75.48 MHz,  $\text{CDCl}_3$ ) spectrum of 3-butyl-3-thiocyanatopentane-2,4-dione, **2d**

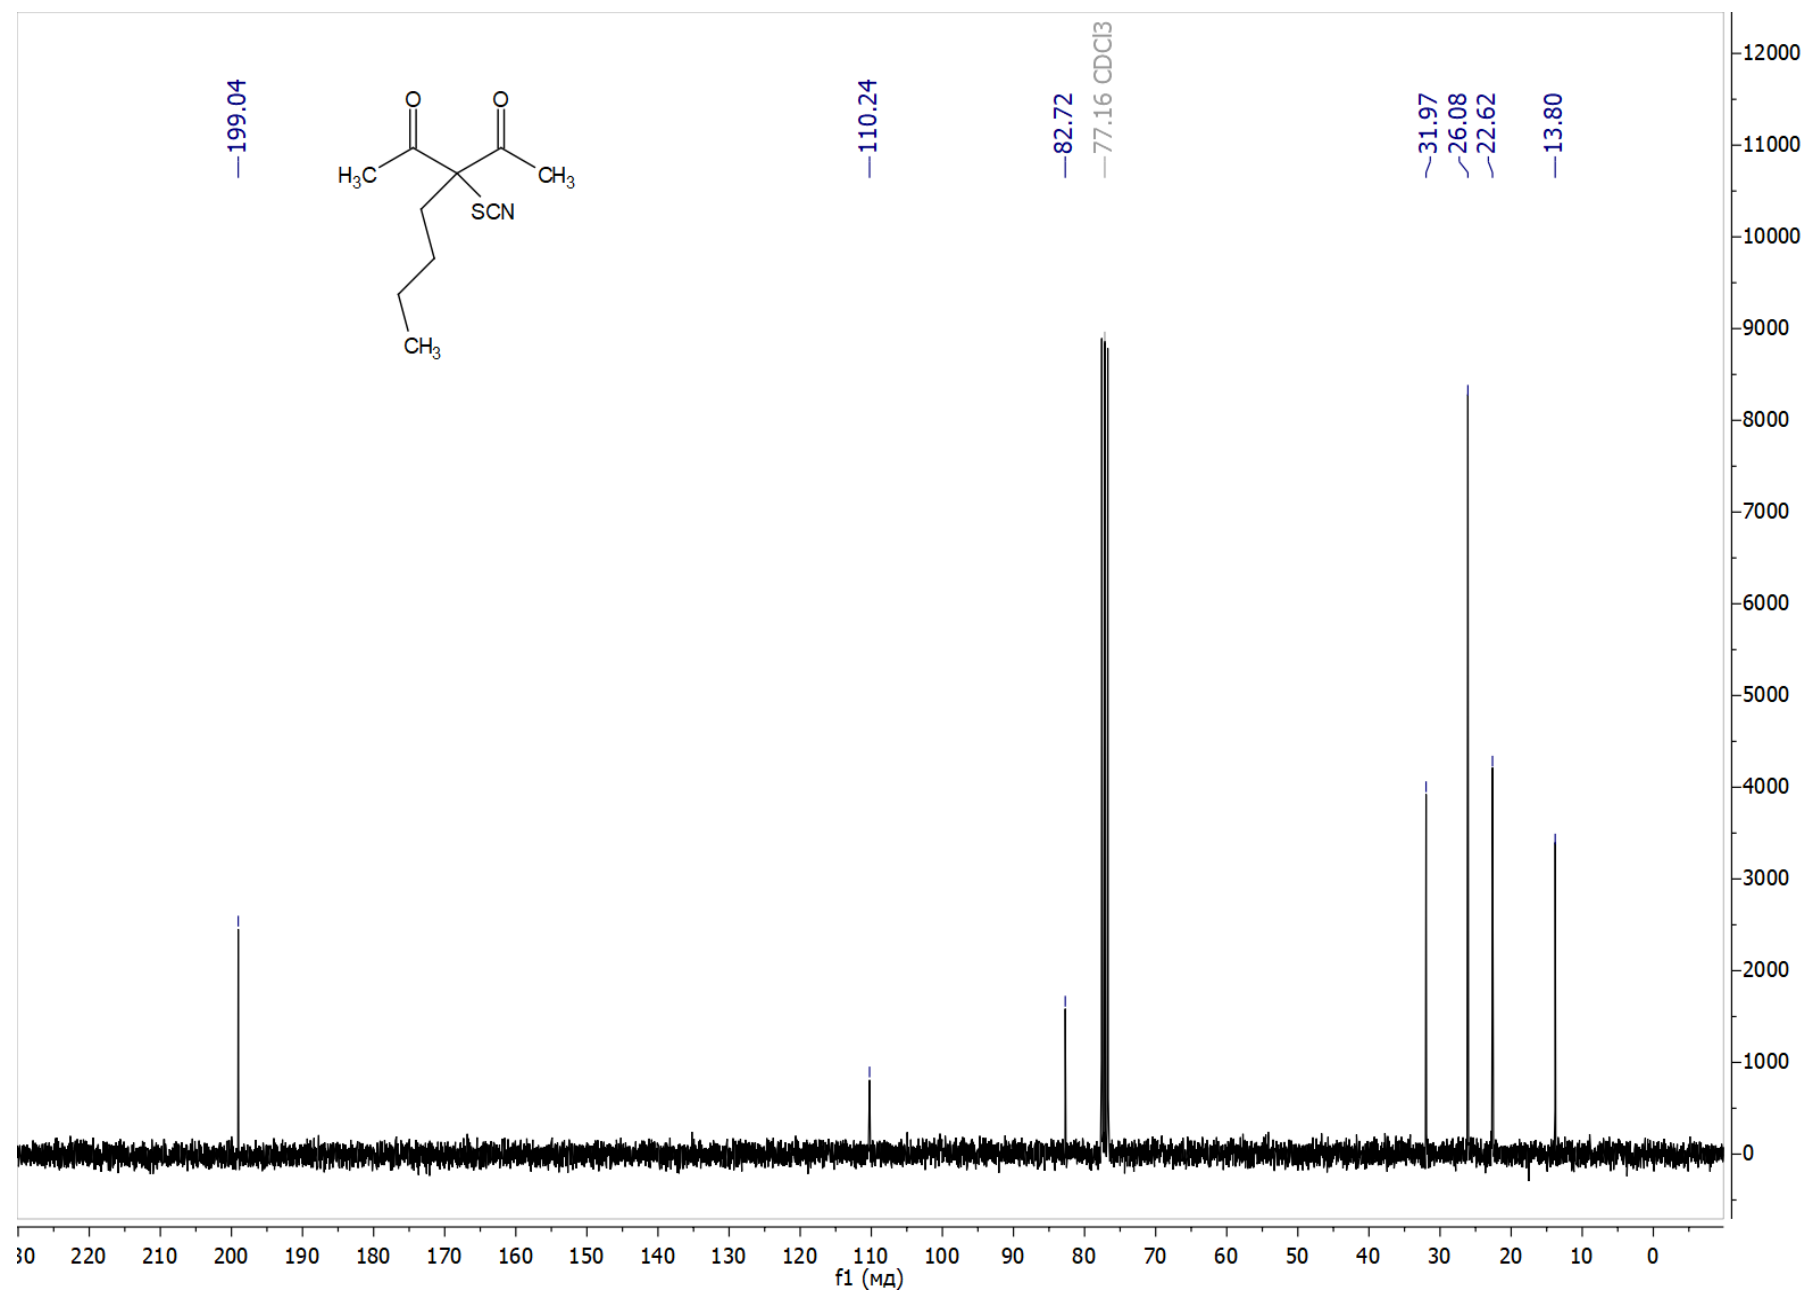

<sup>1</sup>H NMR (300.13 MHz, CDCl<sub>3</sub>) spectrum of 3-hexyl-3-thiocyanatopentane-2,4-dione, **2e**

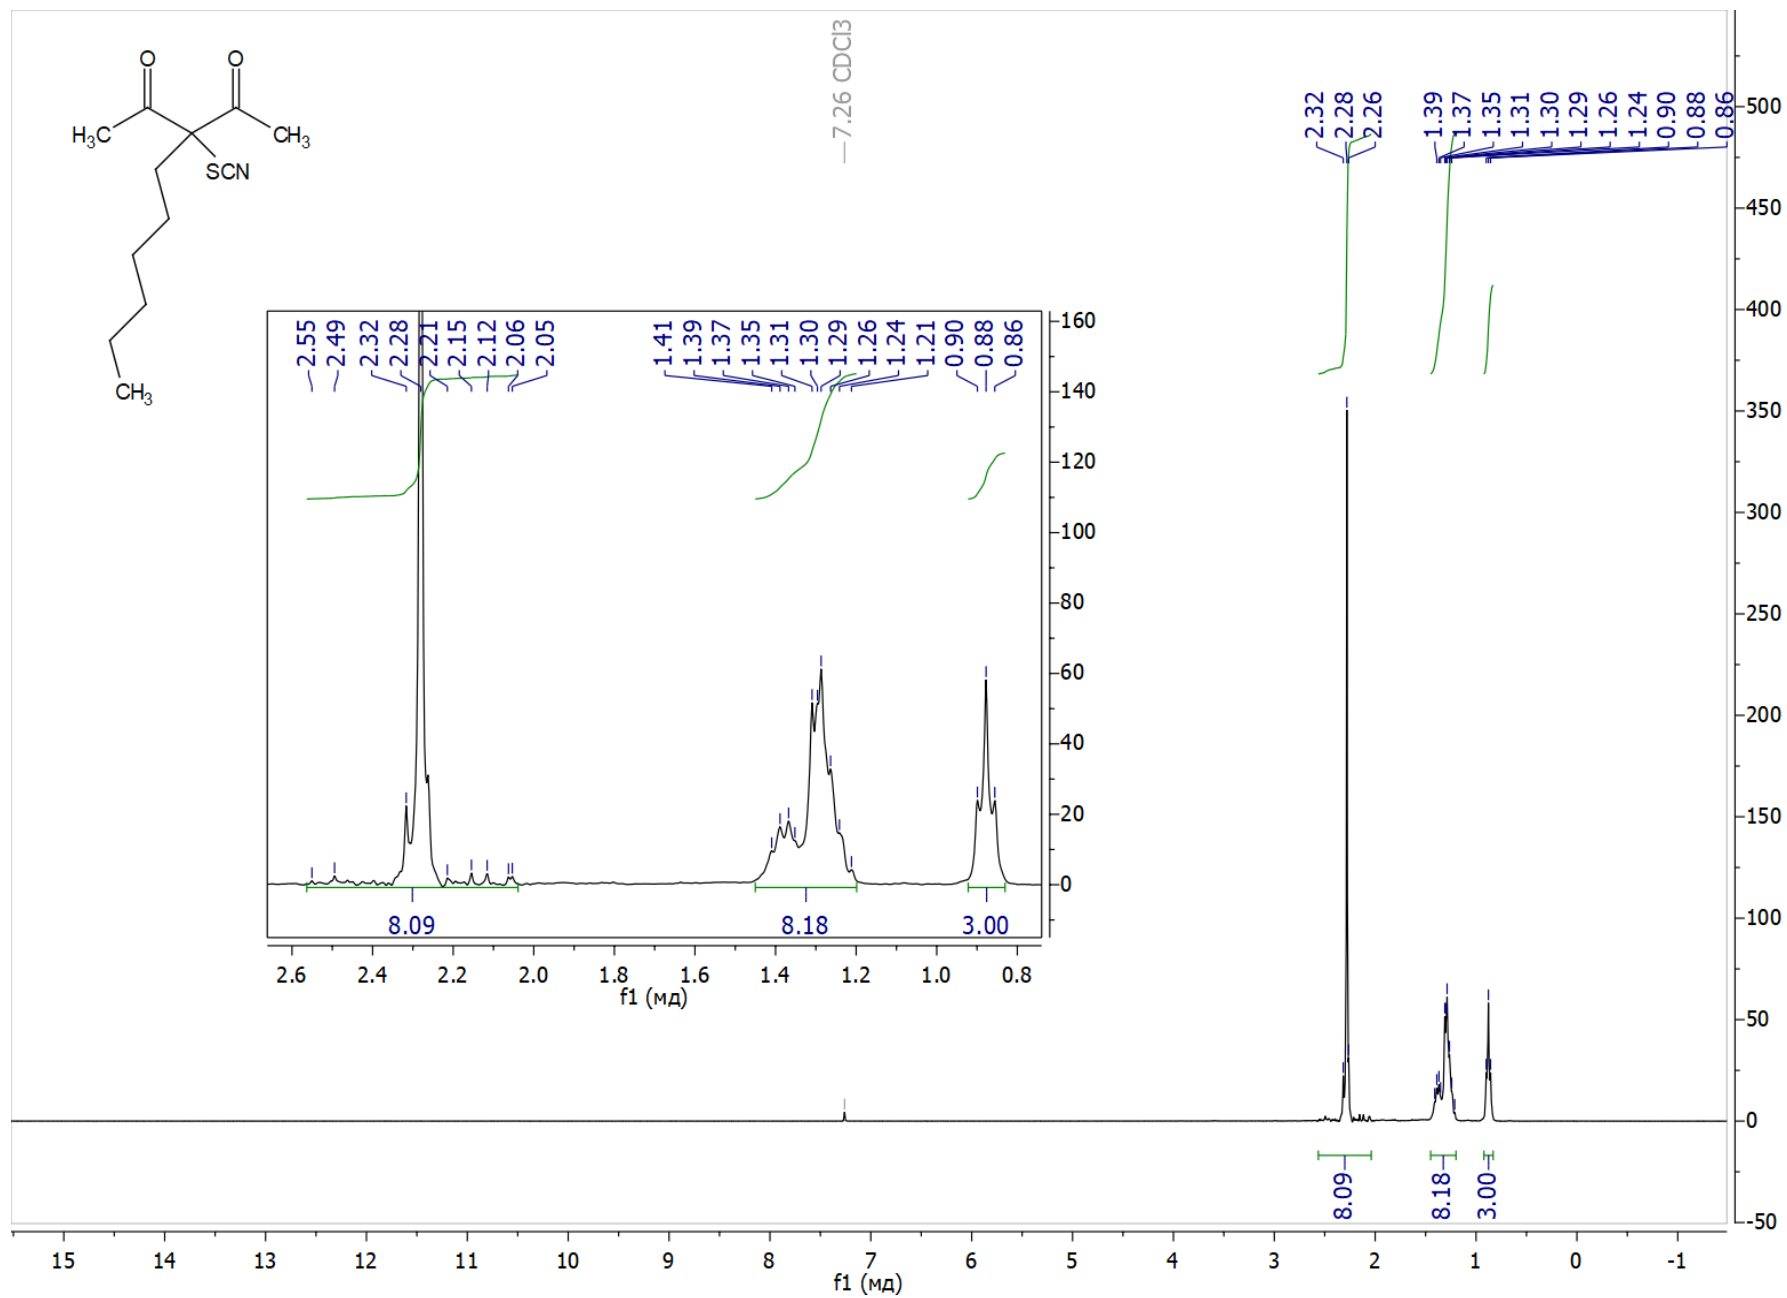

<sup>13</sup>C NMR (75.48 MHz, CDCl<sub>3</sub>) spectrum of 3-hexyl-3-thiocyanatopentane-2,4-dione, **2e**

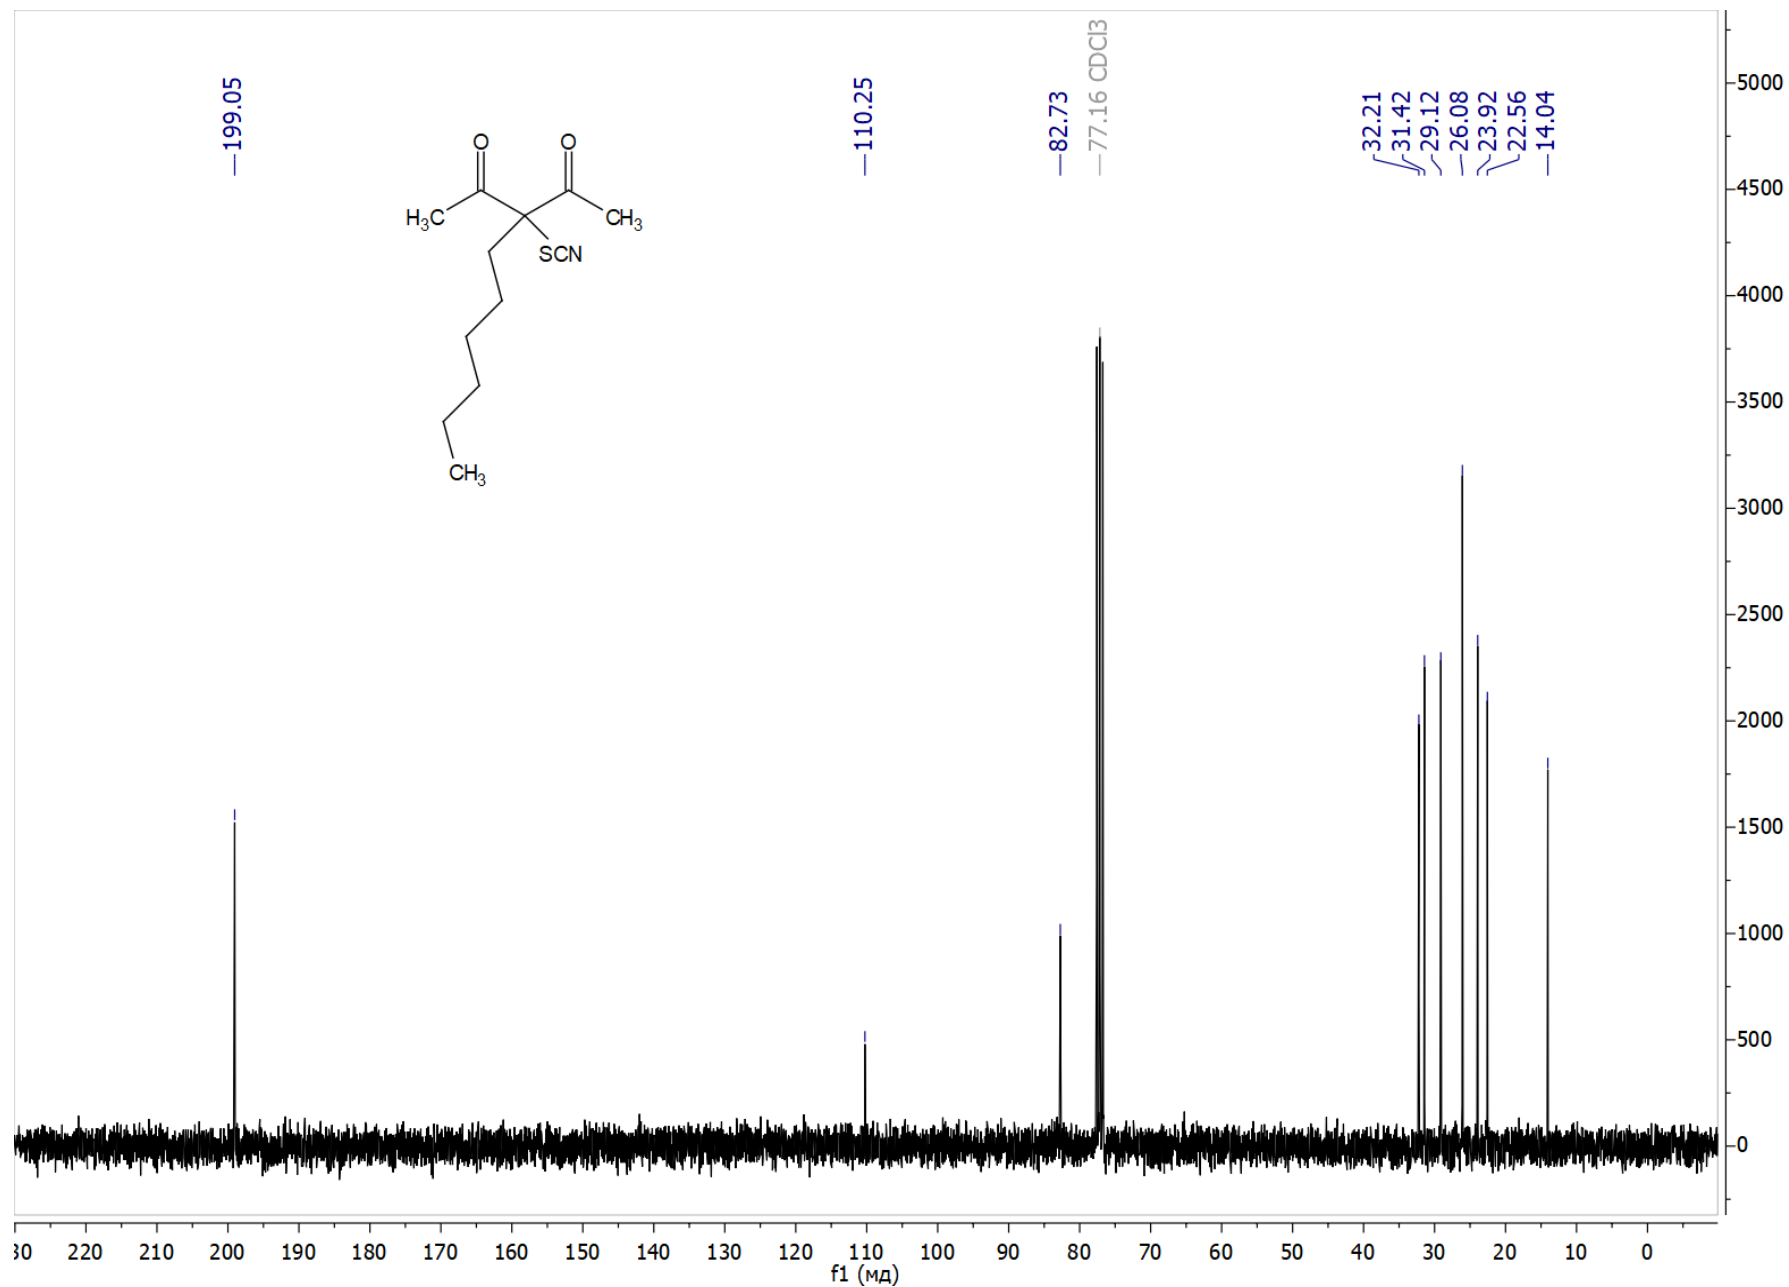

$^1\text{H}$  NMR (300.13 MHz,  $\text{CDCl}_3$ ) spectrum of 3-octyl-3-thiocyanatopentane-2,4-dione, **2f**

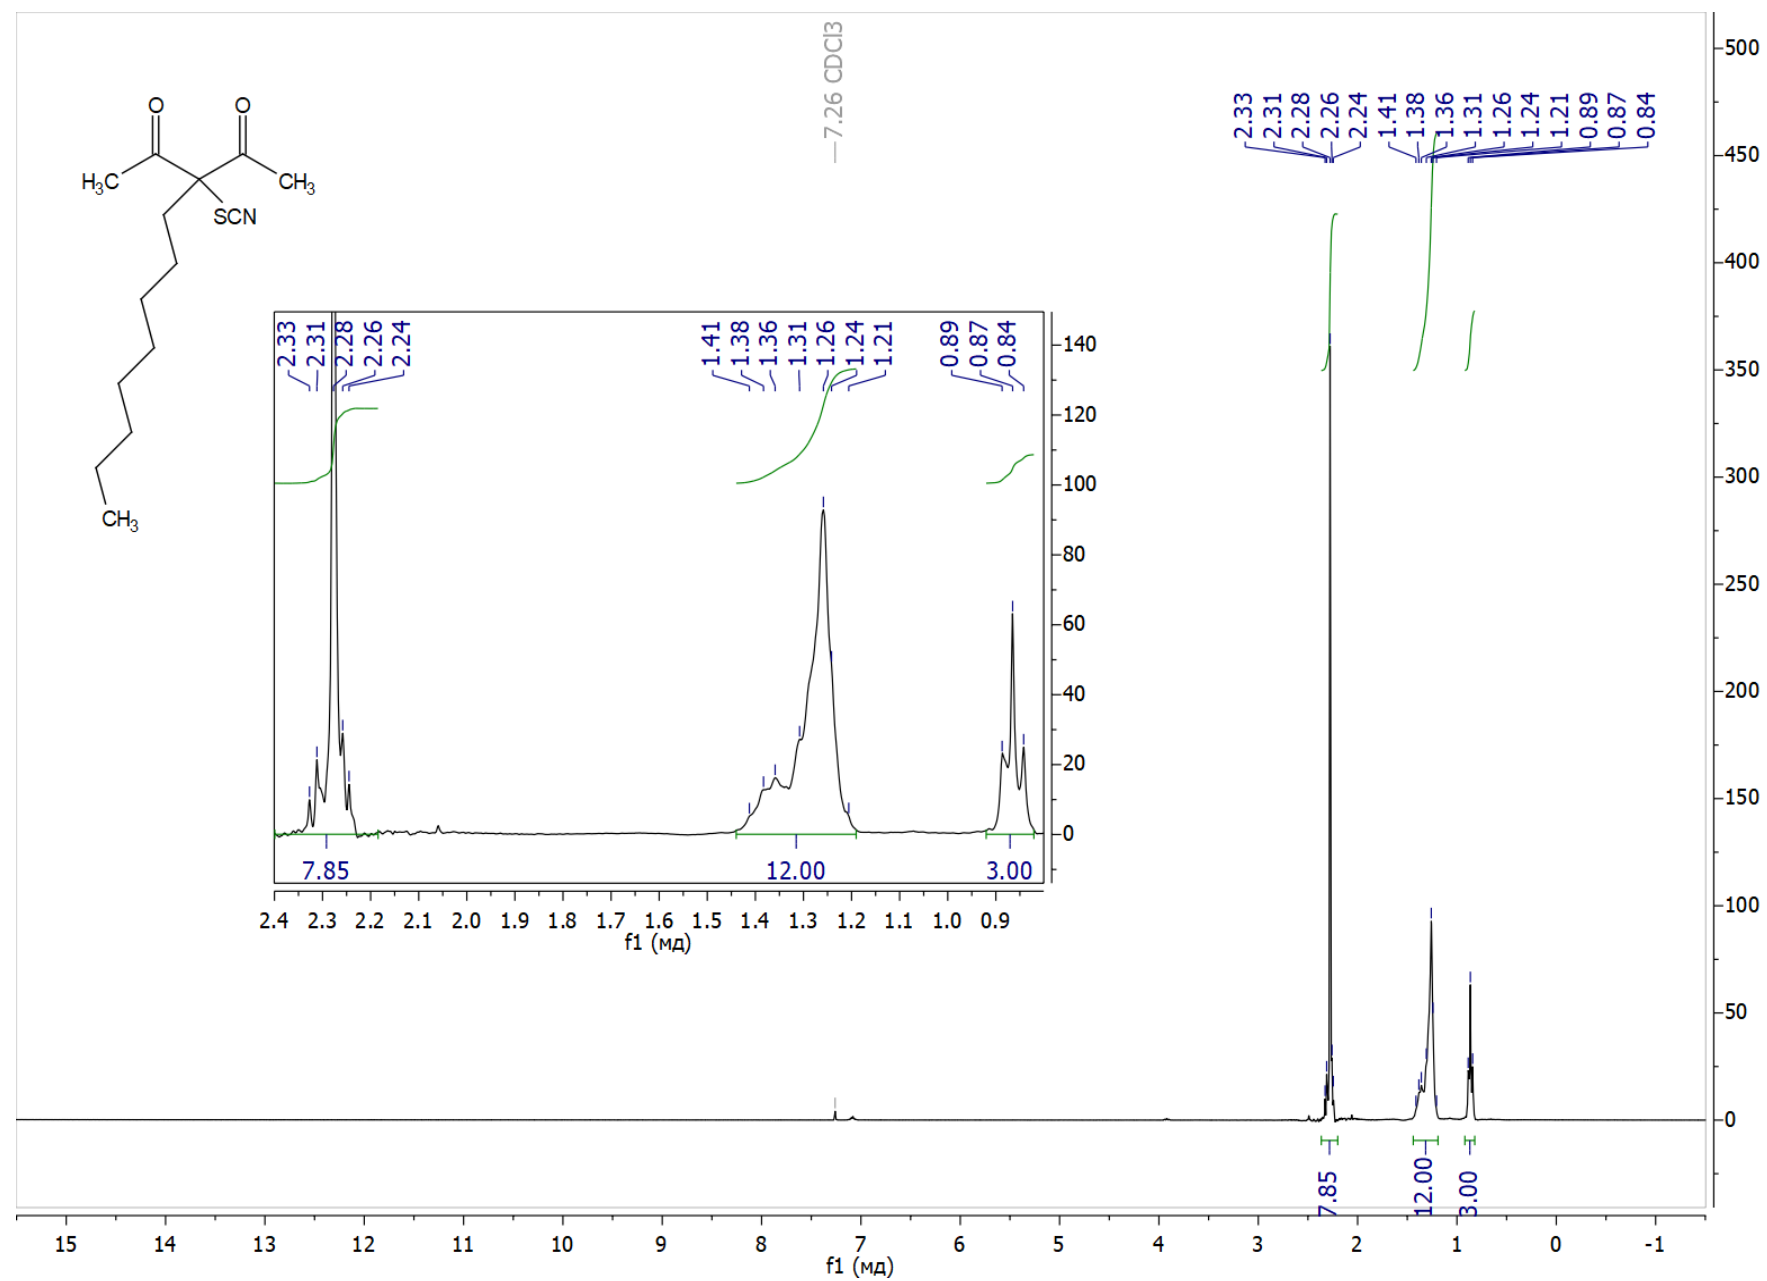

$^{13}\text{C}$  NMR (75.48 MHz,  $\text{CDCl}_3$ ) spectrum of 3-octyl-3-thiocyanatopentane-2,4-dione, **2f**

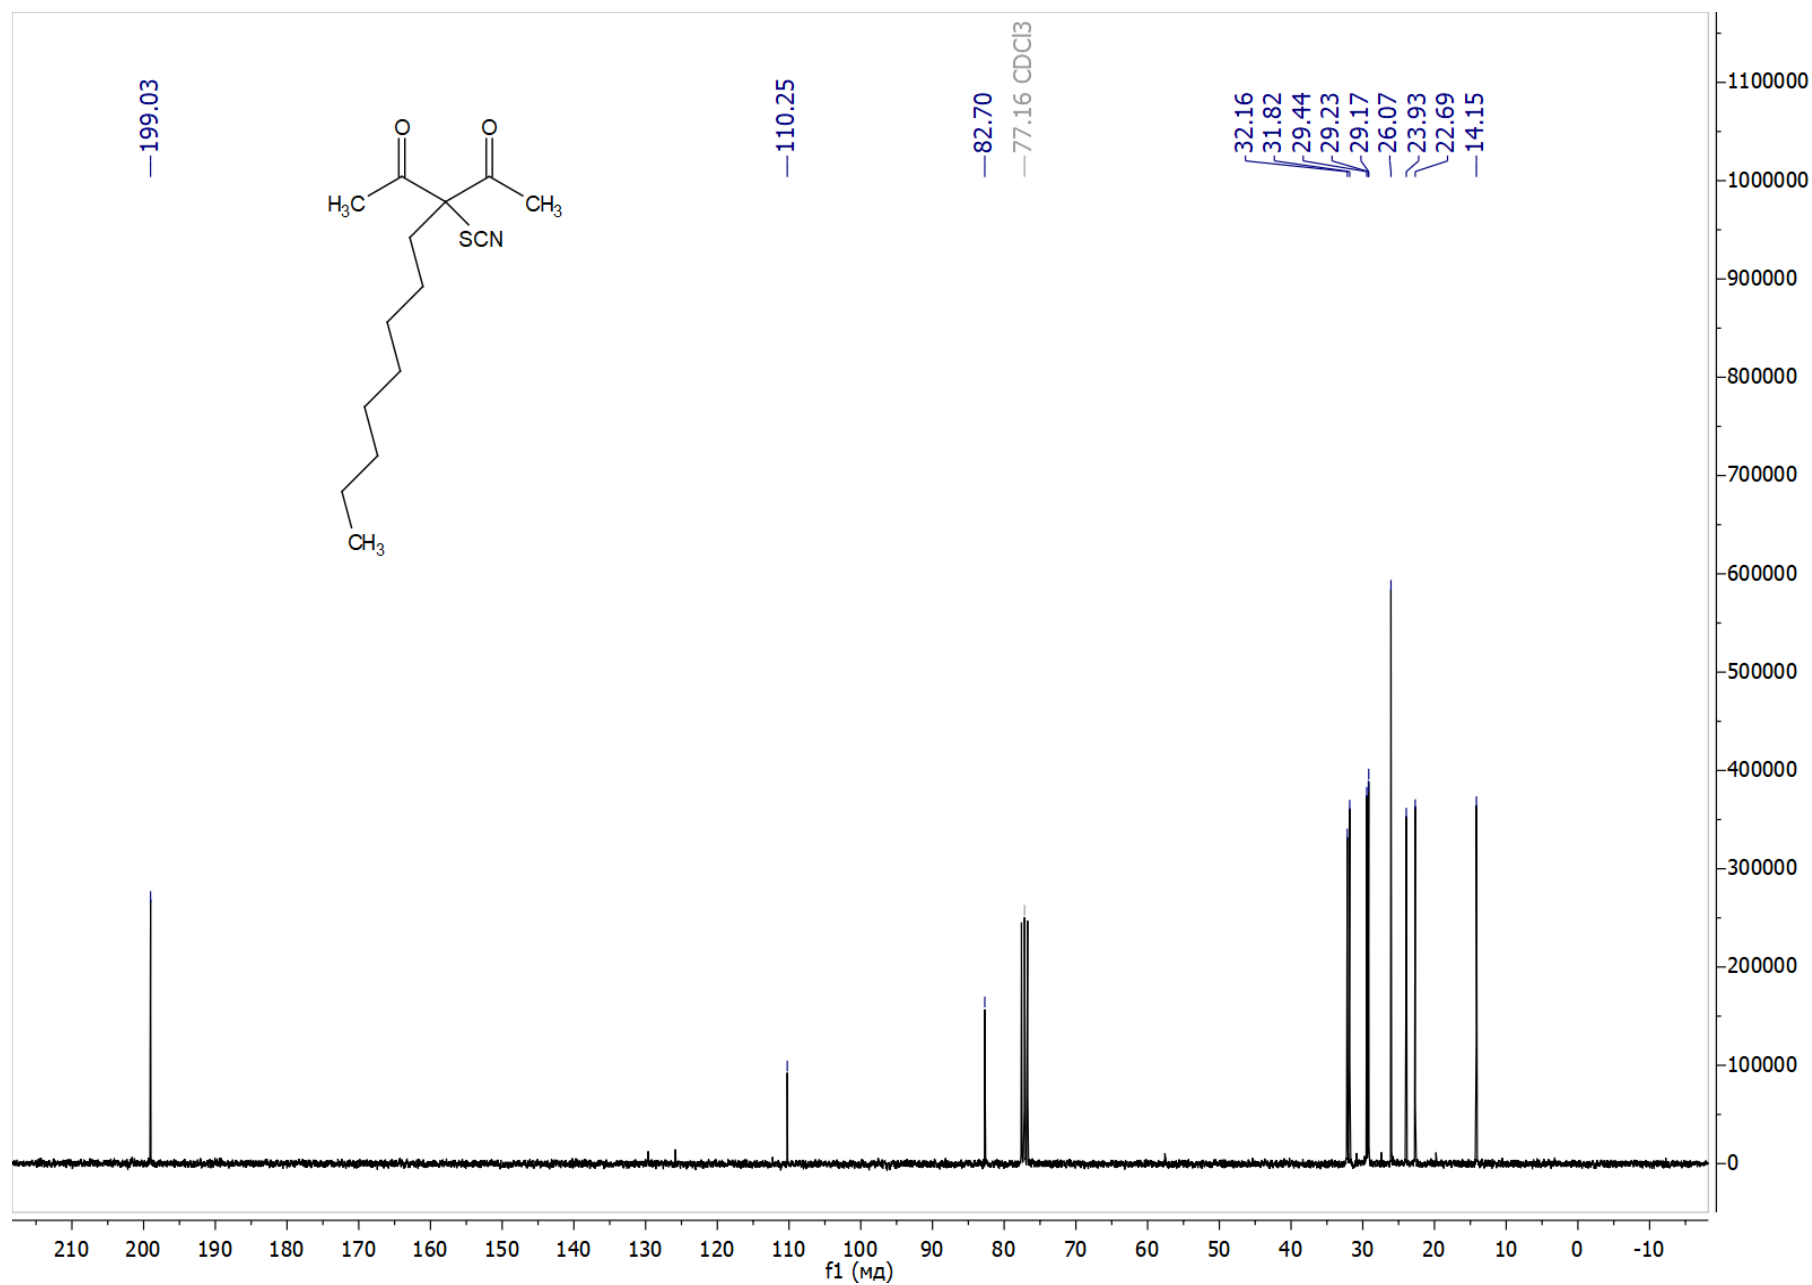

<sup>1</sup>H NMR (300.13 MHz, CDCl<sub>3</sub>) spectrum of 3-isopentyl-3-thiocyanatopentane-2,4-dione, **2g**

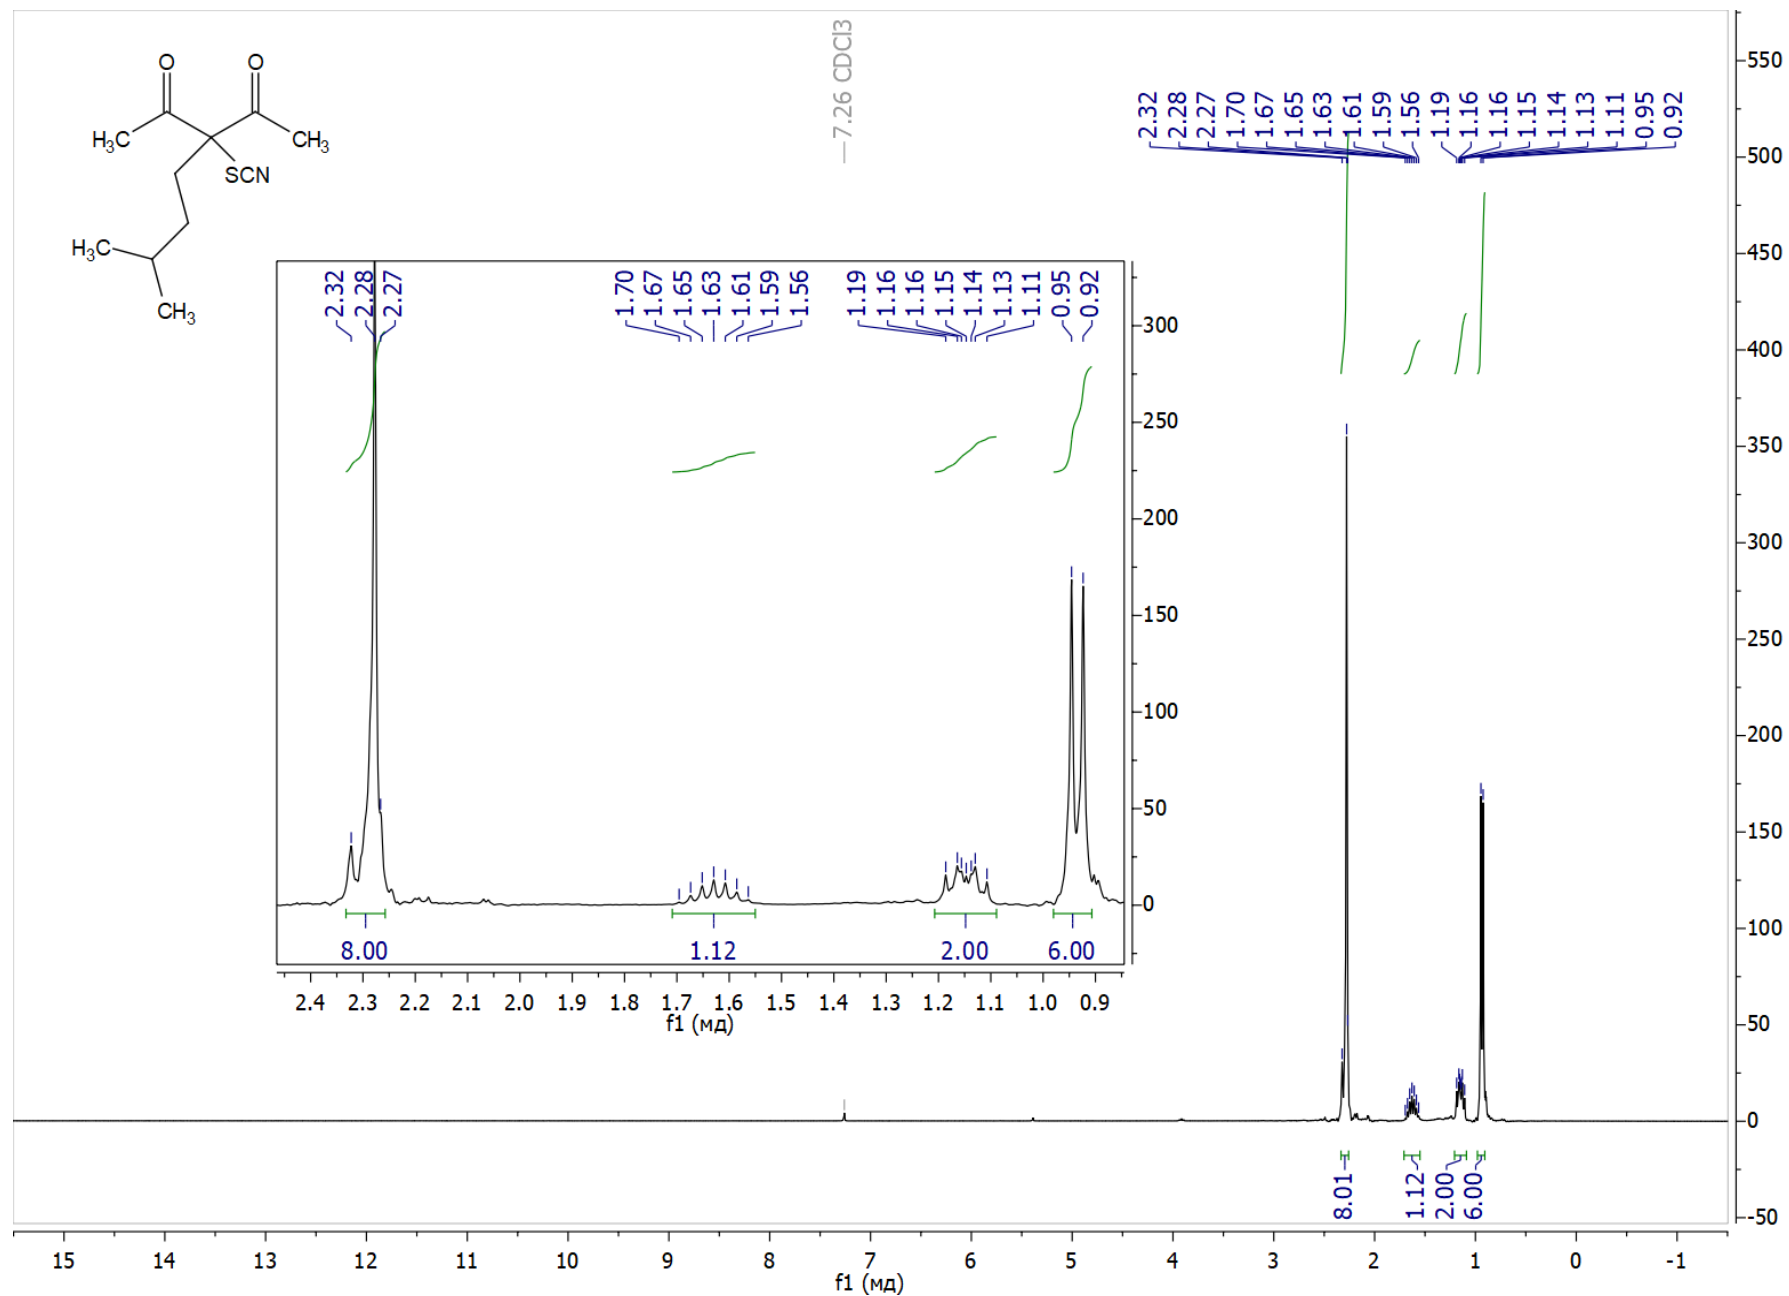

$^{13}\text{C}$  NMR (75.48 MHz,  $\text{CDCl}_3$ ) spectrum of 3-isopentyl-3-thiocyanatopentane-2,4-dione, **2g**

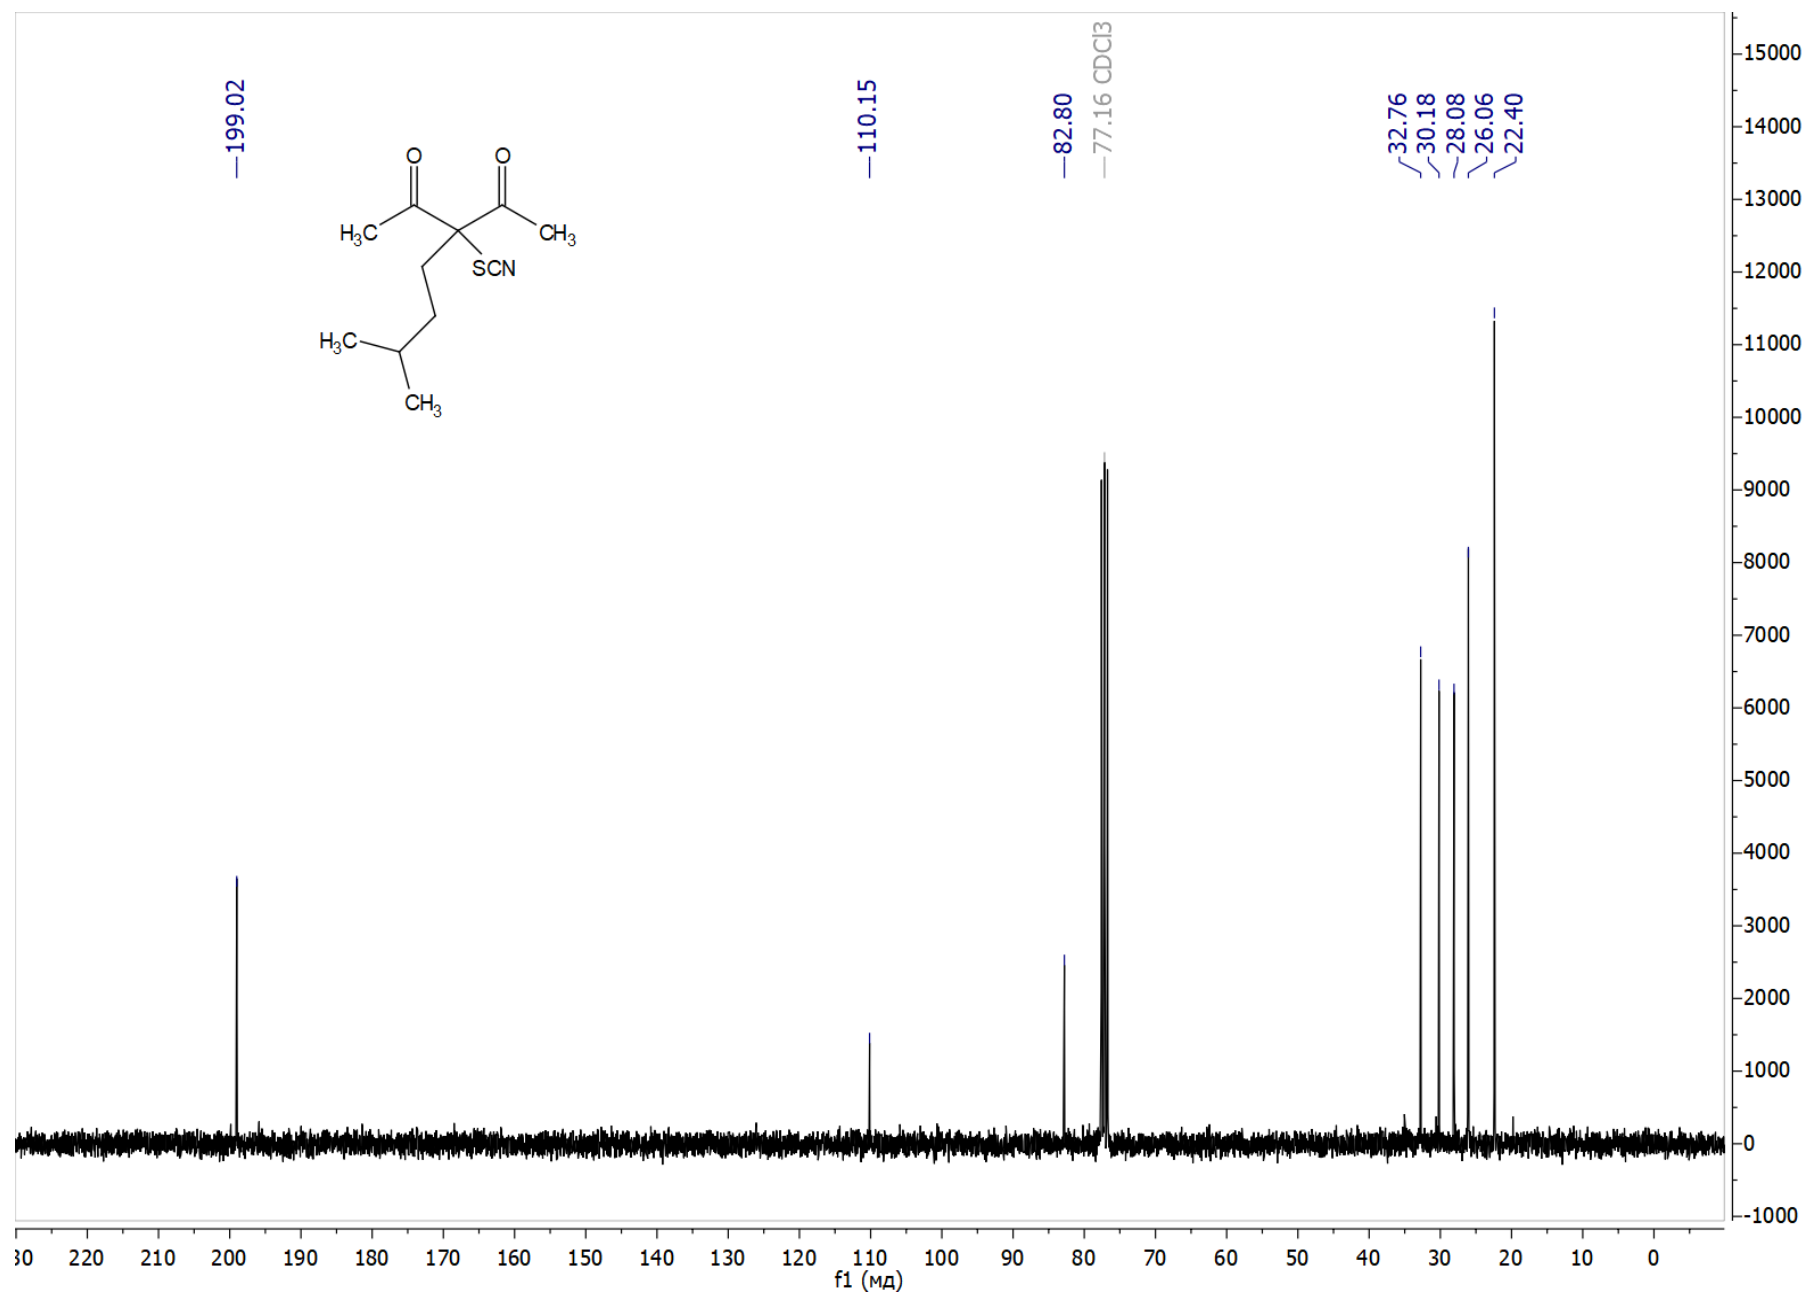

S30

<sup>1</sup>H NMR (300.13 MHz, CDCl<sub>3</sub>) spectrum of 3-ethyl-6-methyl-3-thiocyanatoheptane-2,4-dione, **2h**

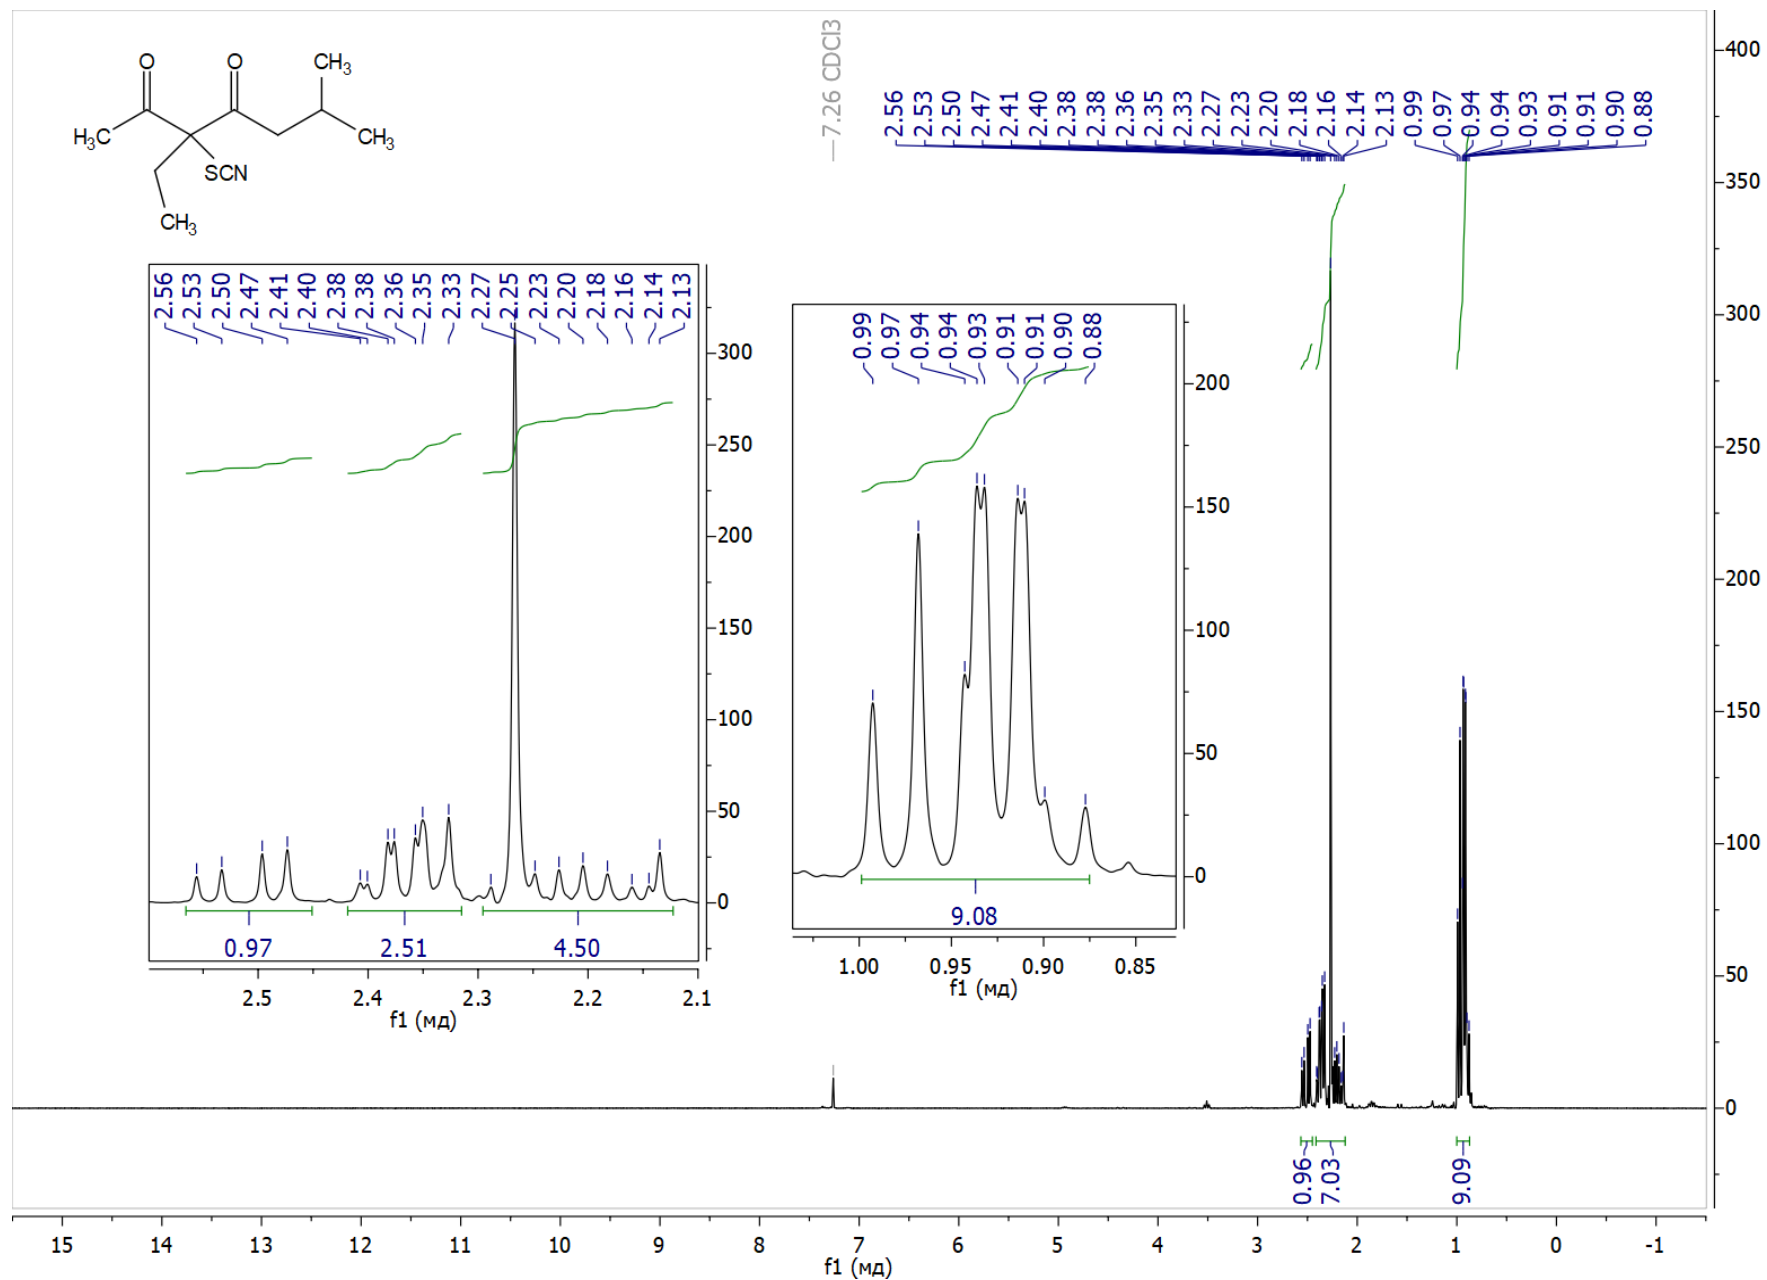

$^{13}\text{C}$  NMR (75.48 MHz,  $\text{CDCl}_3$ ) spectrum of 3-ethyl-6-methyl-3-thiocyanatoheptane-2,4-dione, **2h**

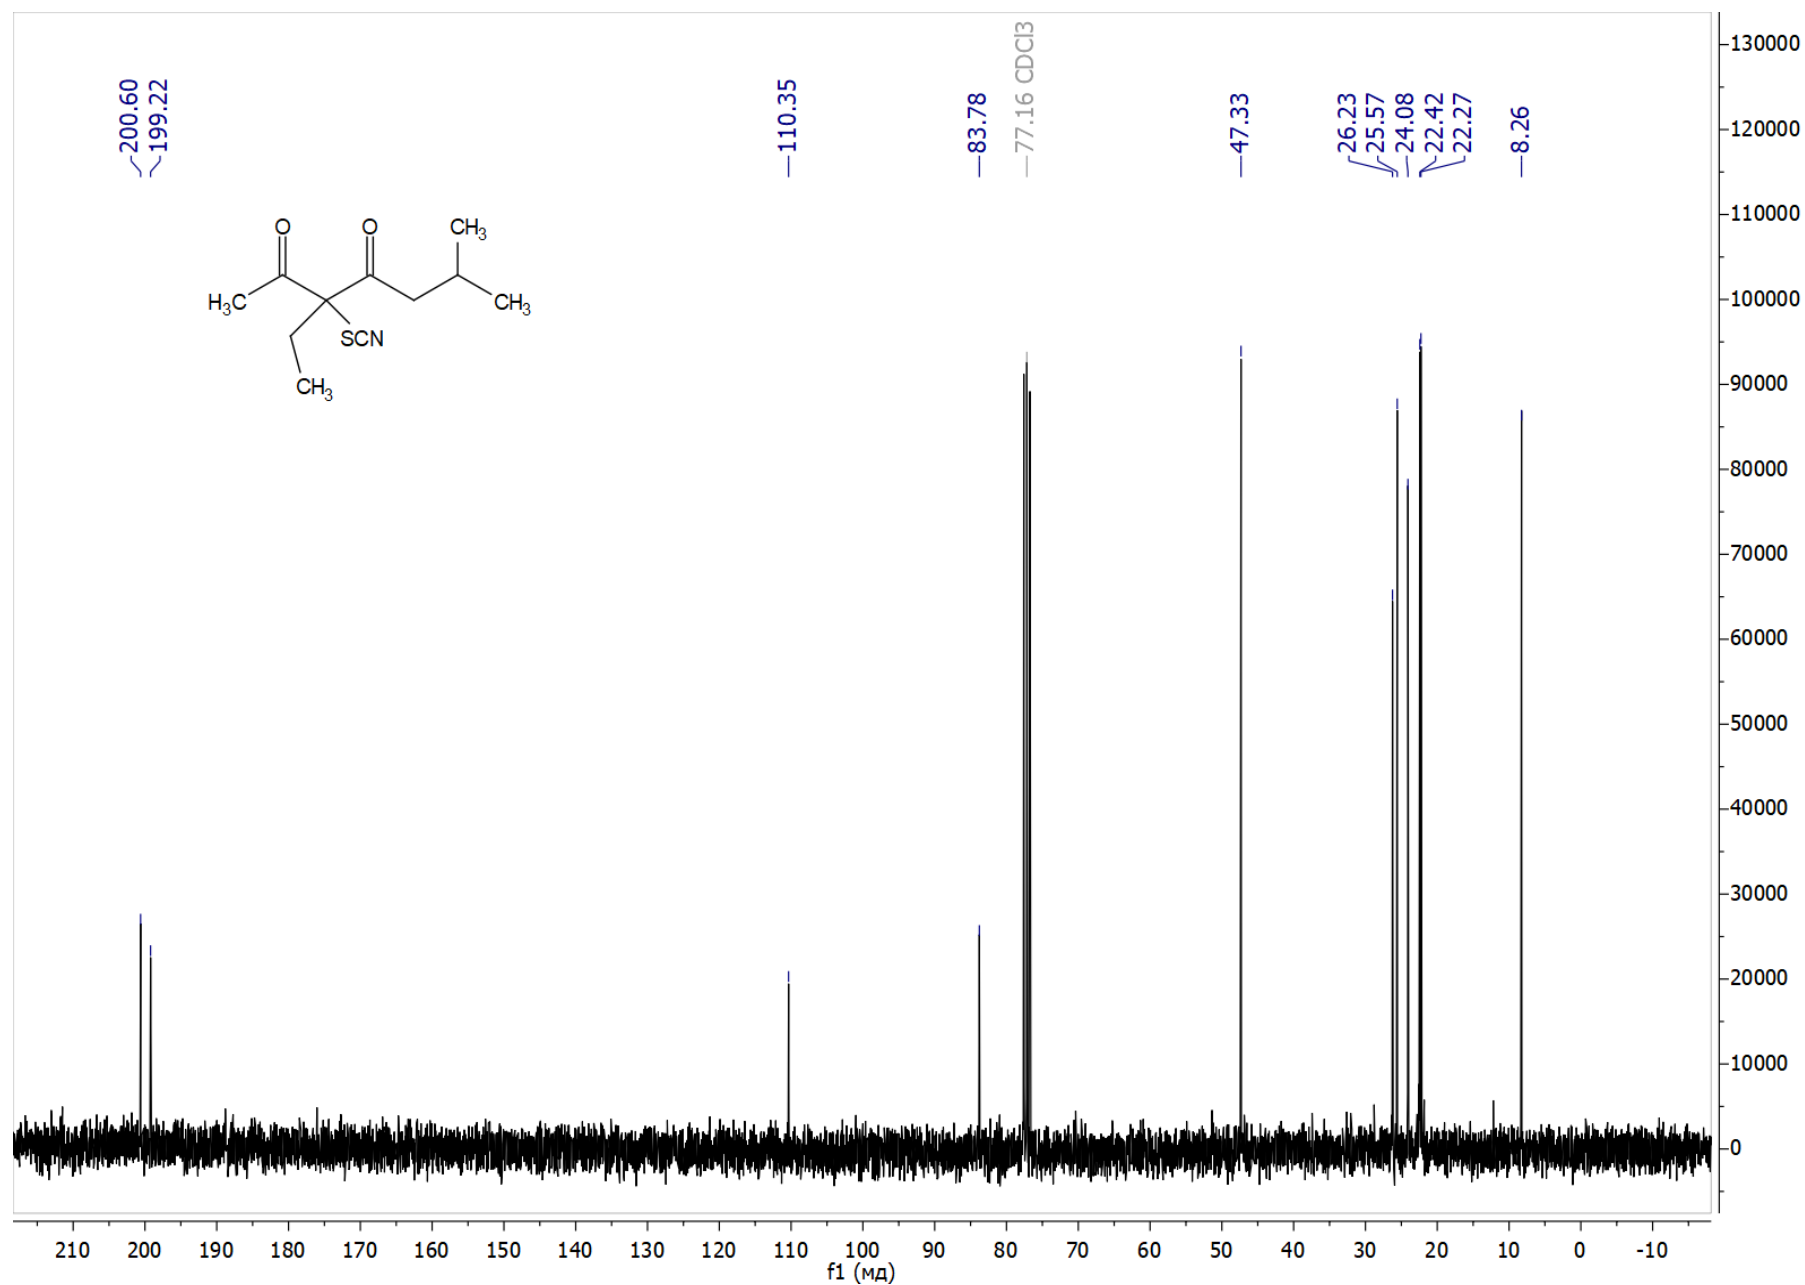

<sup>1</sup>H NMR (300.13 MHz, CDCl<sub>3</sub>) spectrum of ethyl 4-acetyl-5-oxo-4-thiocyanatohexanoate, **2i**

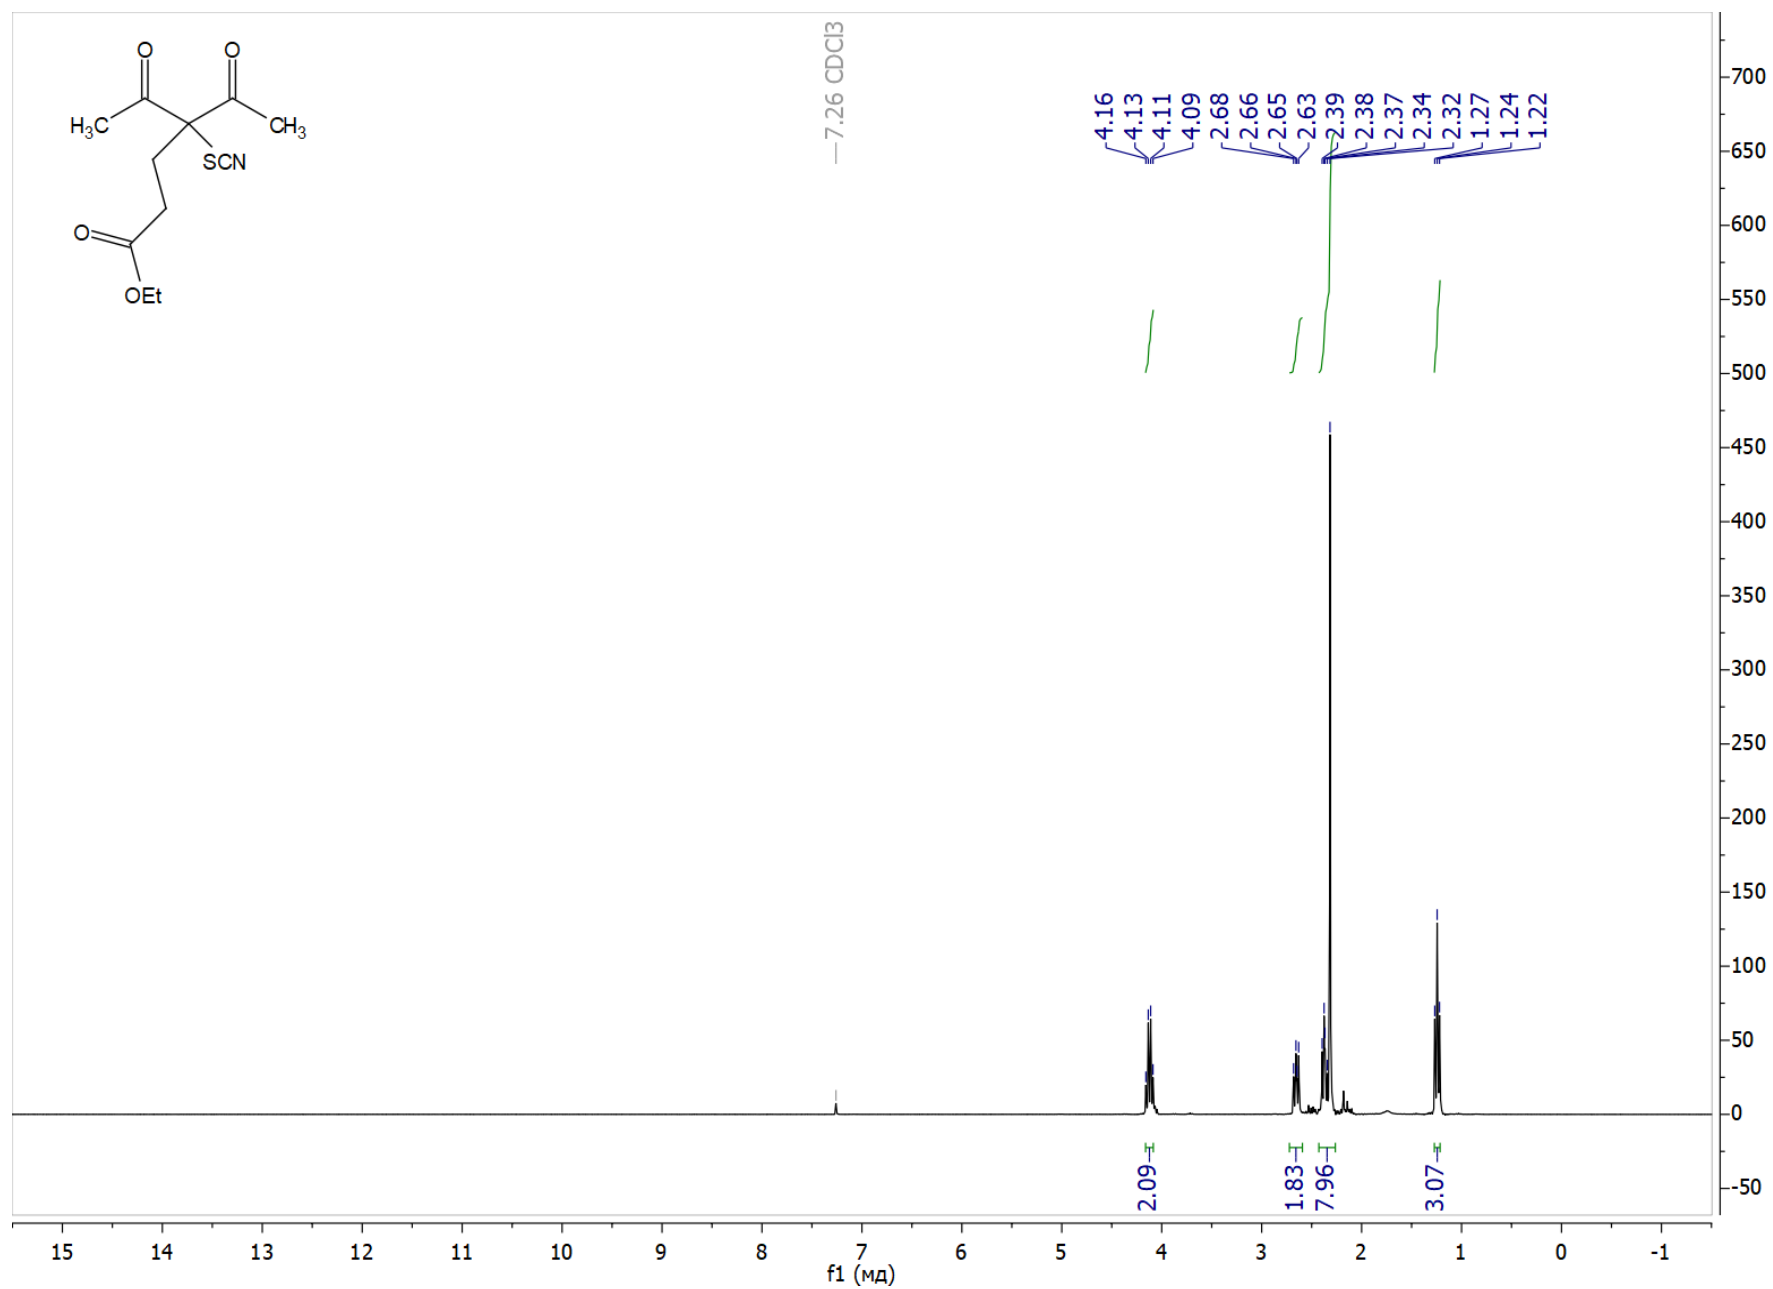

$^{13}\text{C}$  NMR (75.48 MHz,  $\text{CDCl}_3$ ) spectrum of ethyl 4-acetyl-5-oxo-4-thiocyanatohexanoate, **2i**

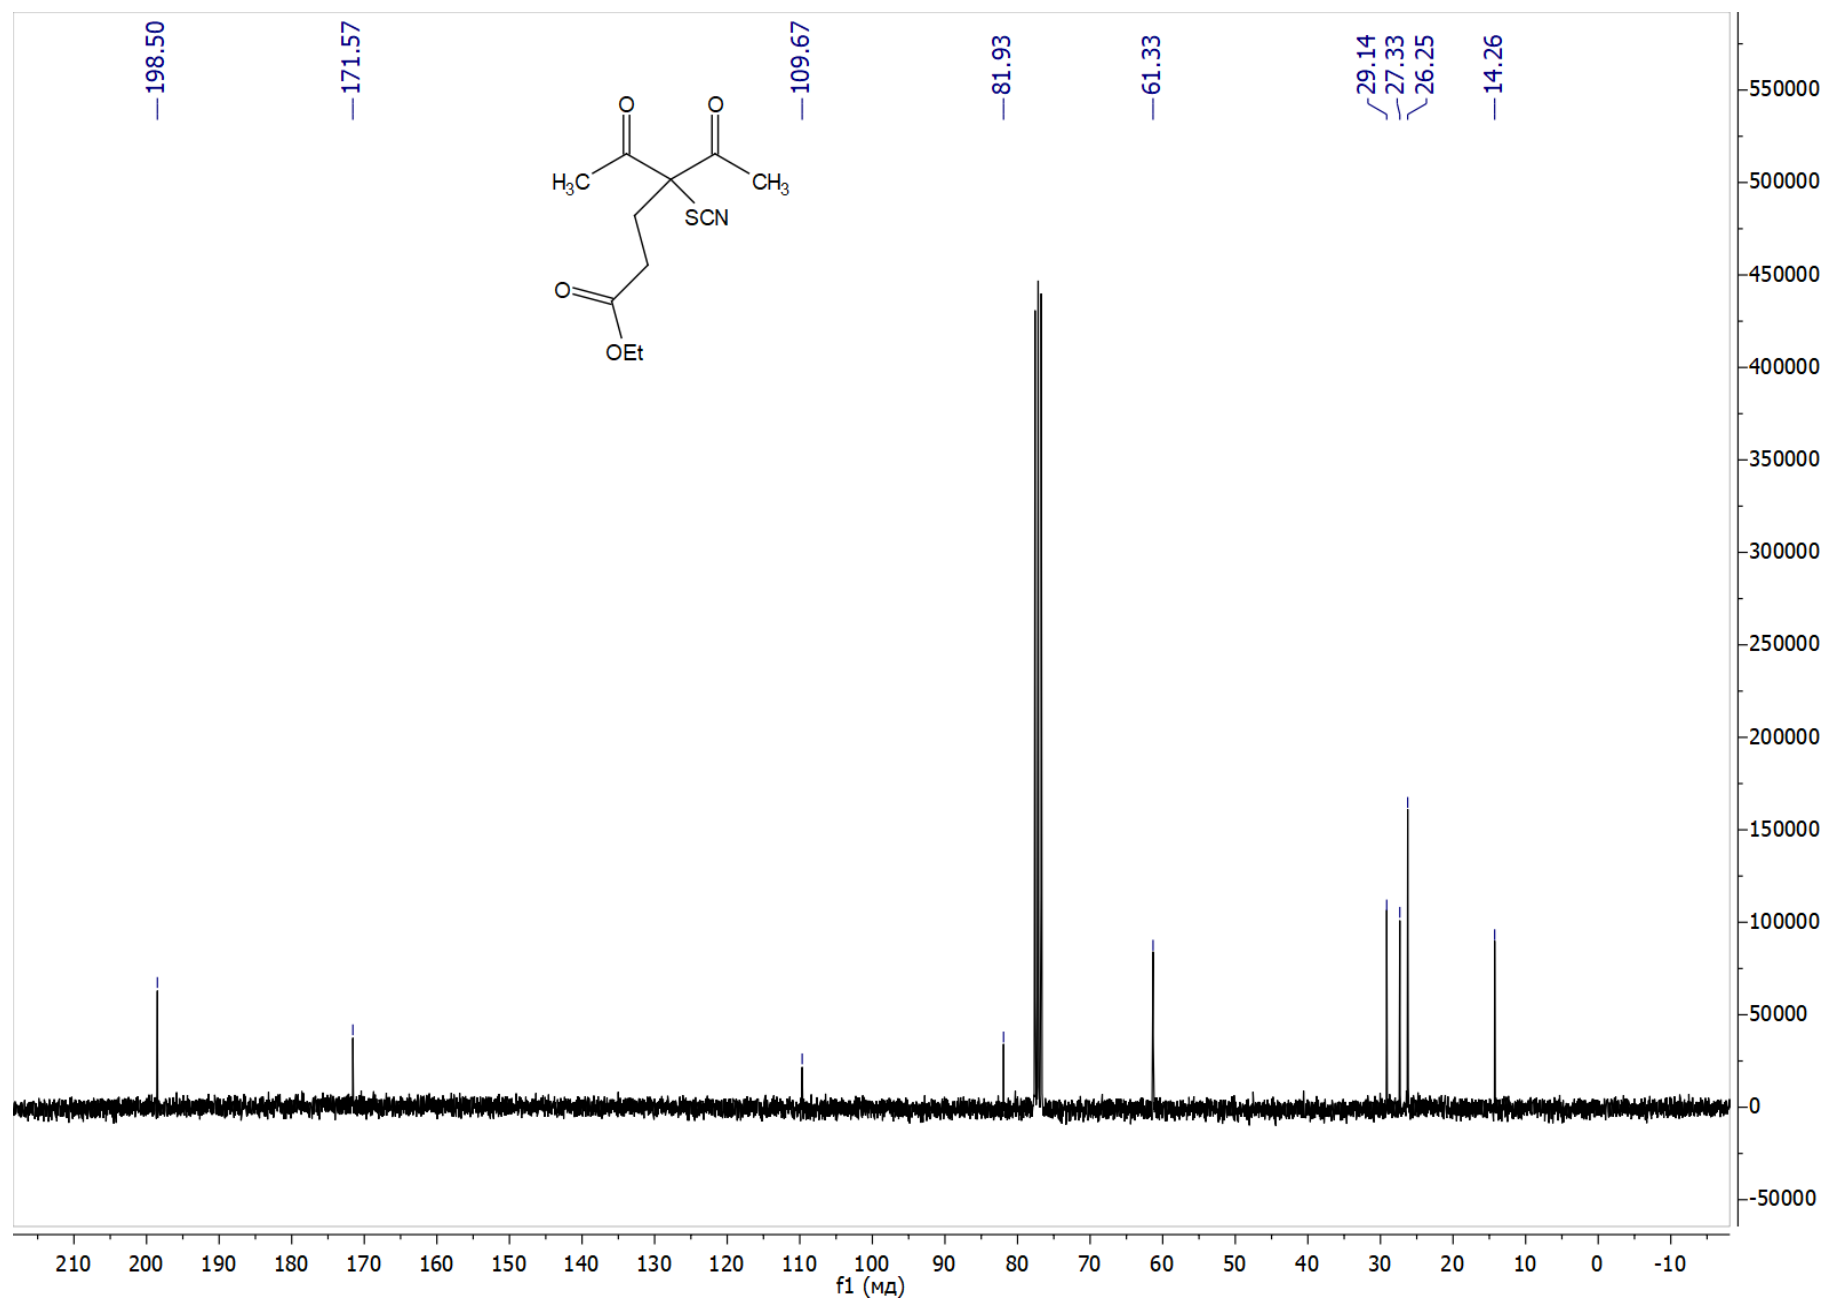

S34

<sup>1</sup>H NMR (300.13 MHz, CDCl<sub>3</sub>) spectrum of ethyl 2-benzyl-3-oxo-2-thiocyanatobutanoate, **2j**

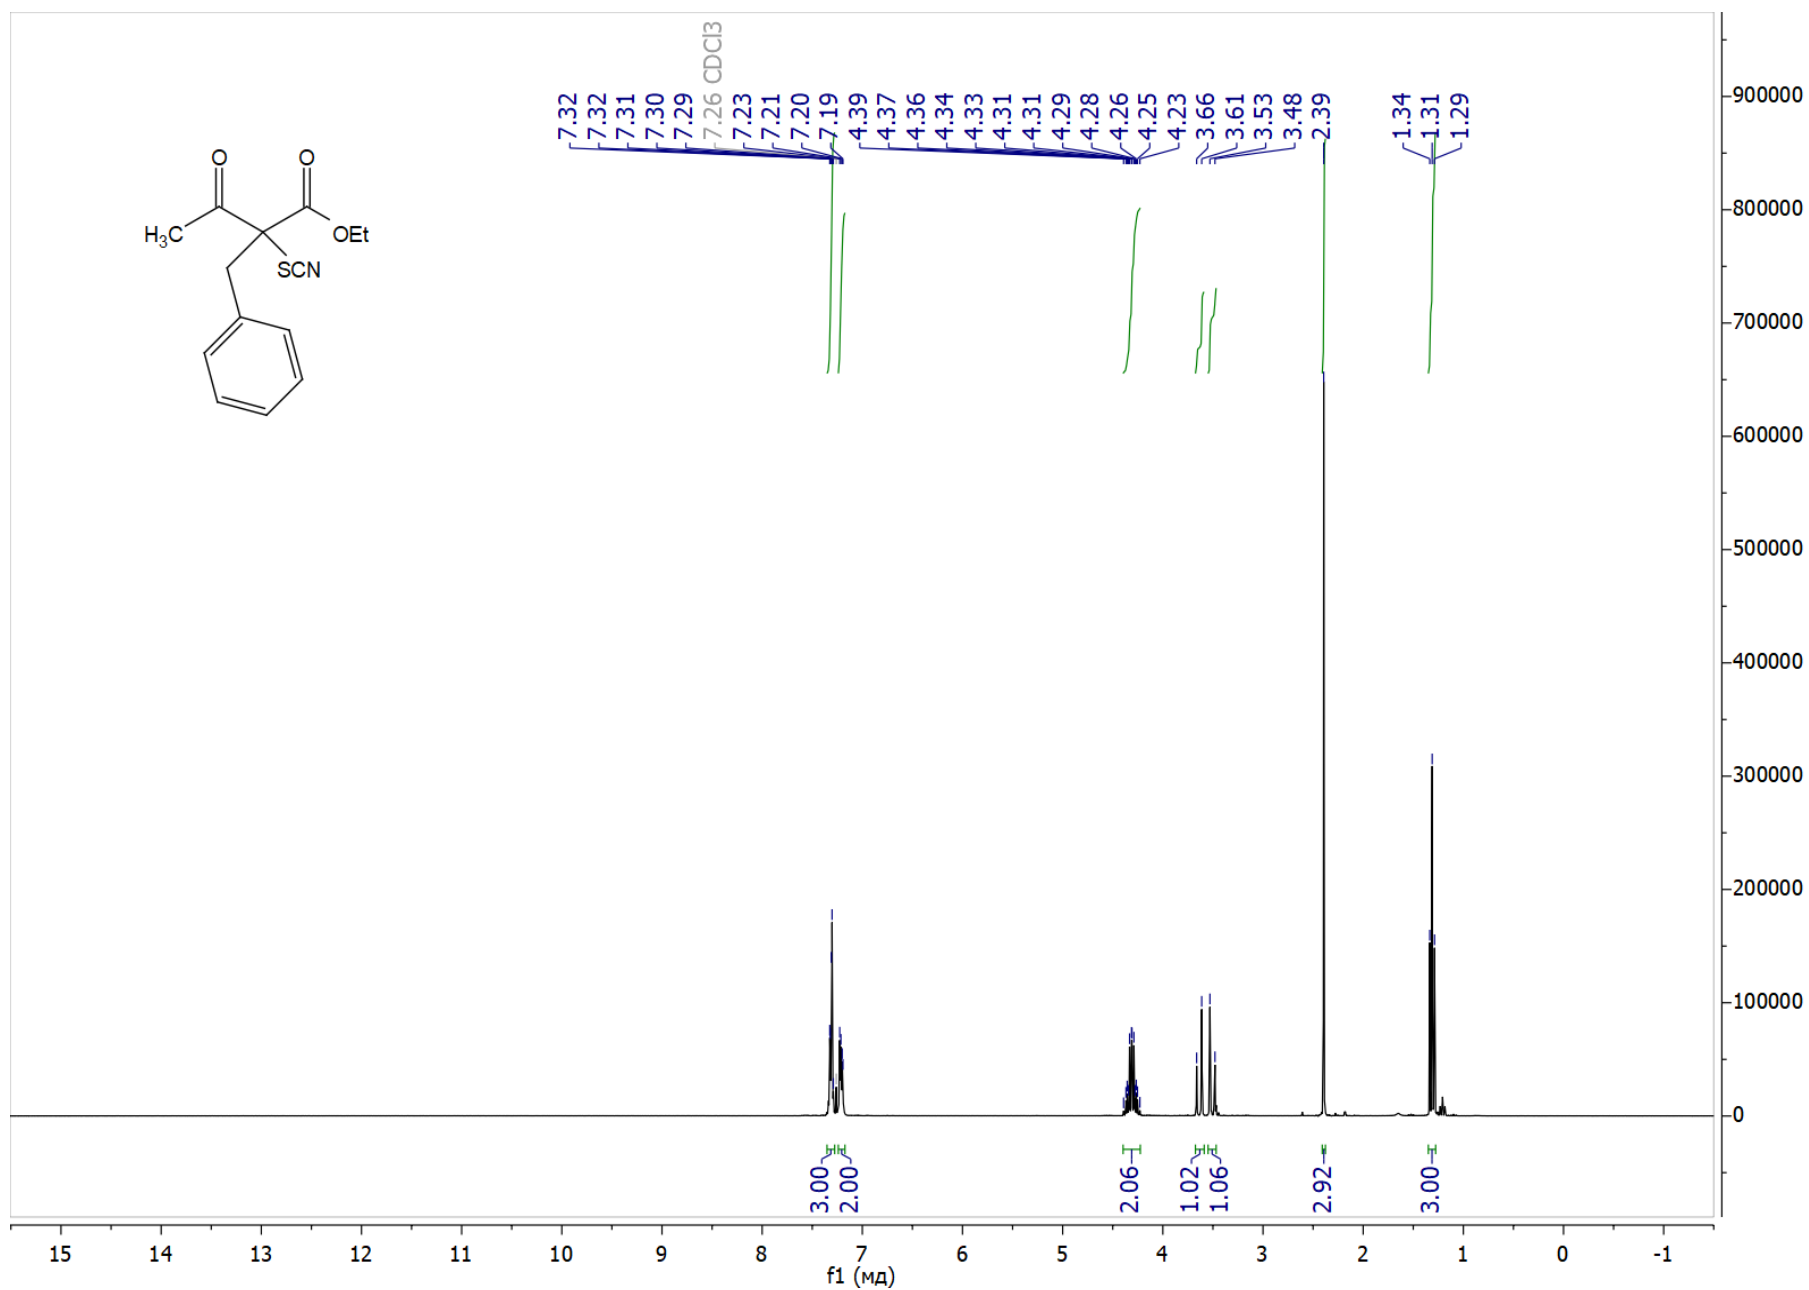

<sup>13</sup>C NMR (75.48 MHz, CDCl<sub>3</sub>) spectrum of ethyl 2-benzyl-3-oxo-2-thiocyanatobutanoate, **2j**

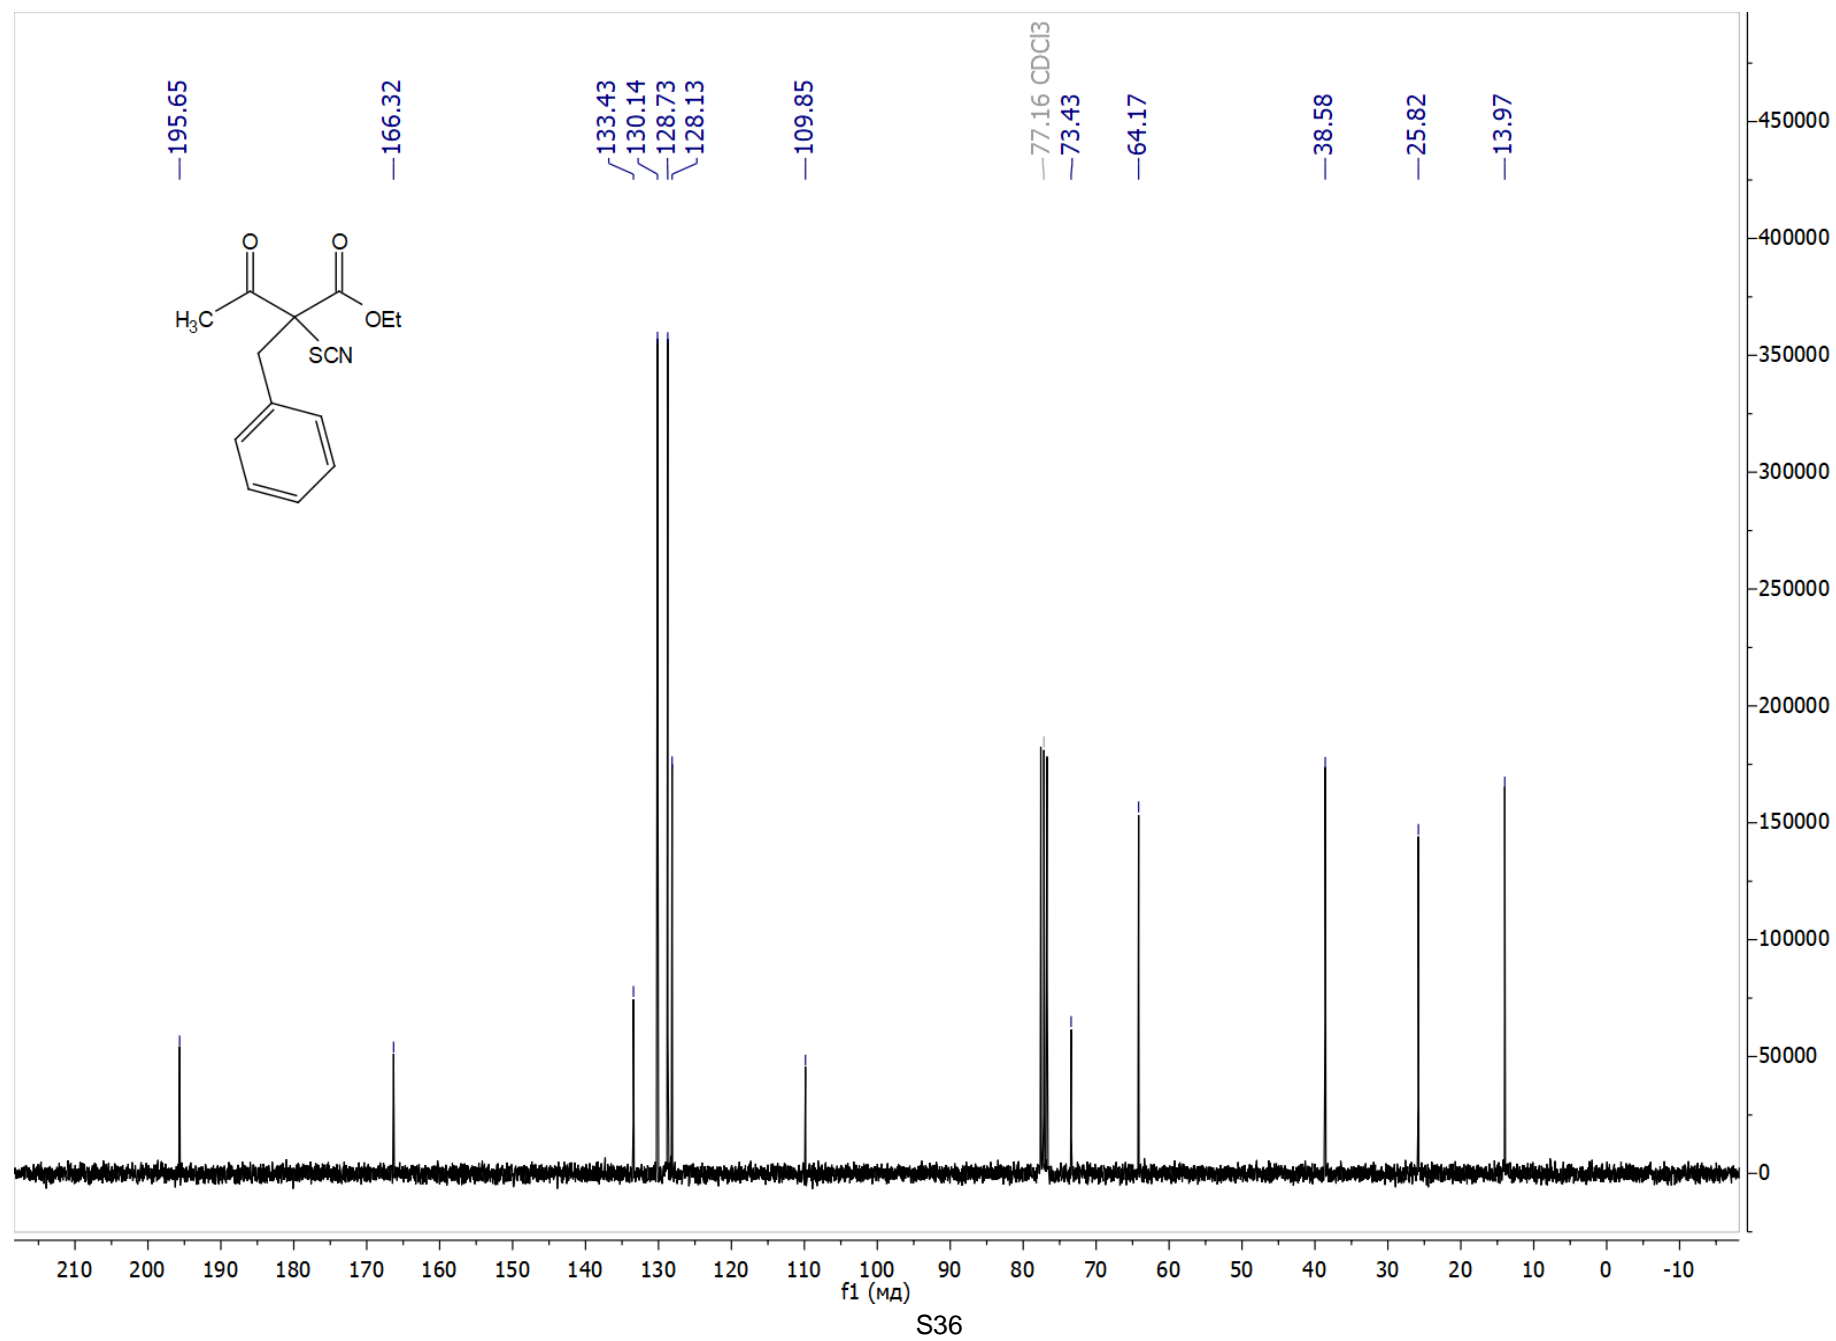

$^1\text{H}$  NMR (300.13 MHz,  $\text{CDCl}_3$ ) spectrum of ethyl 2-(4-(*tert*-butyl)benzyl)-3-oxo-2-thiocyanatobutanoate, **2k**

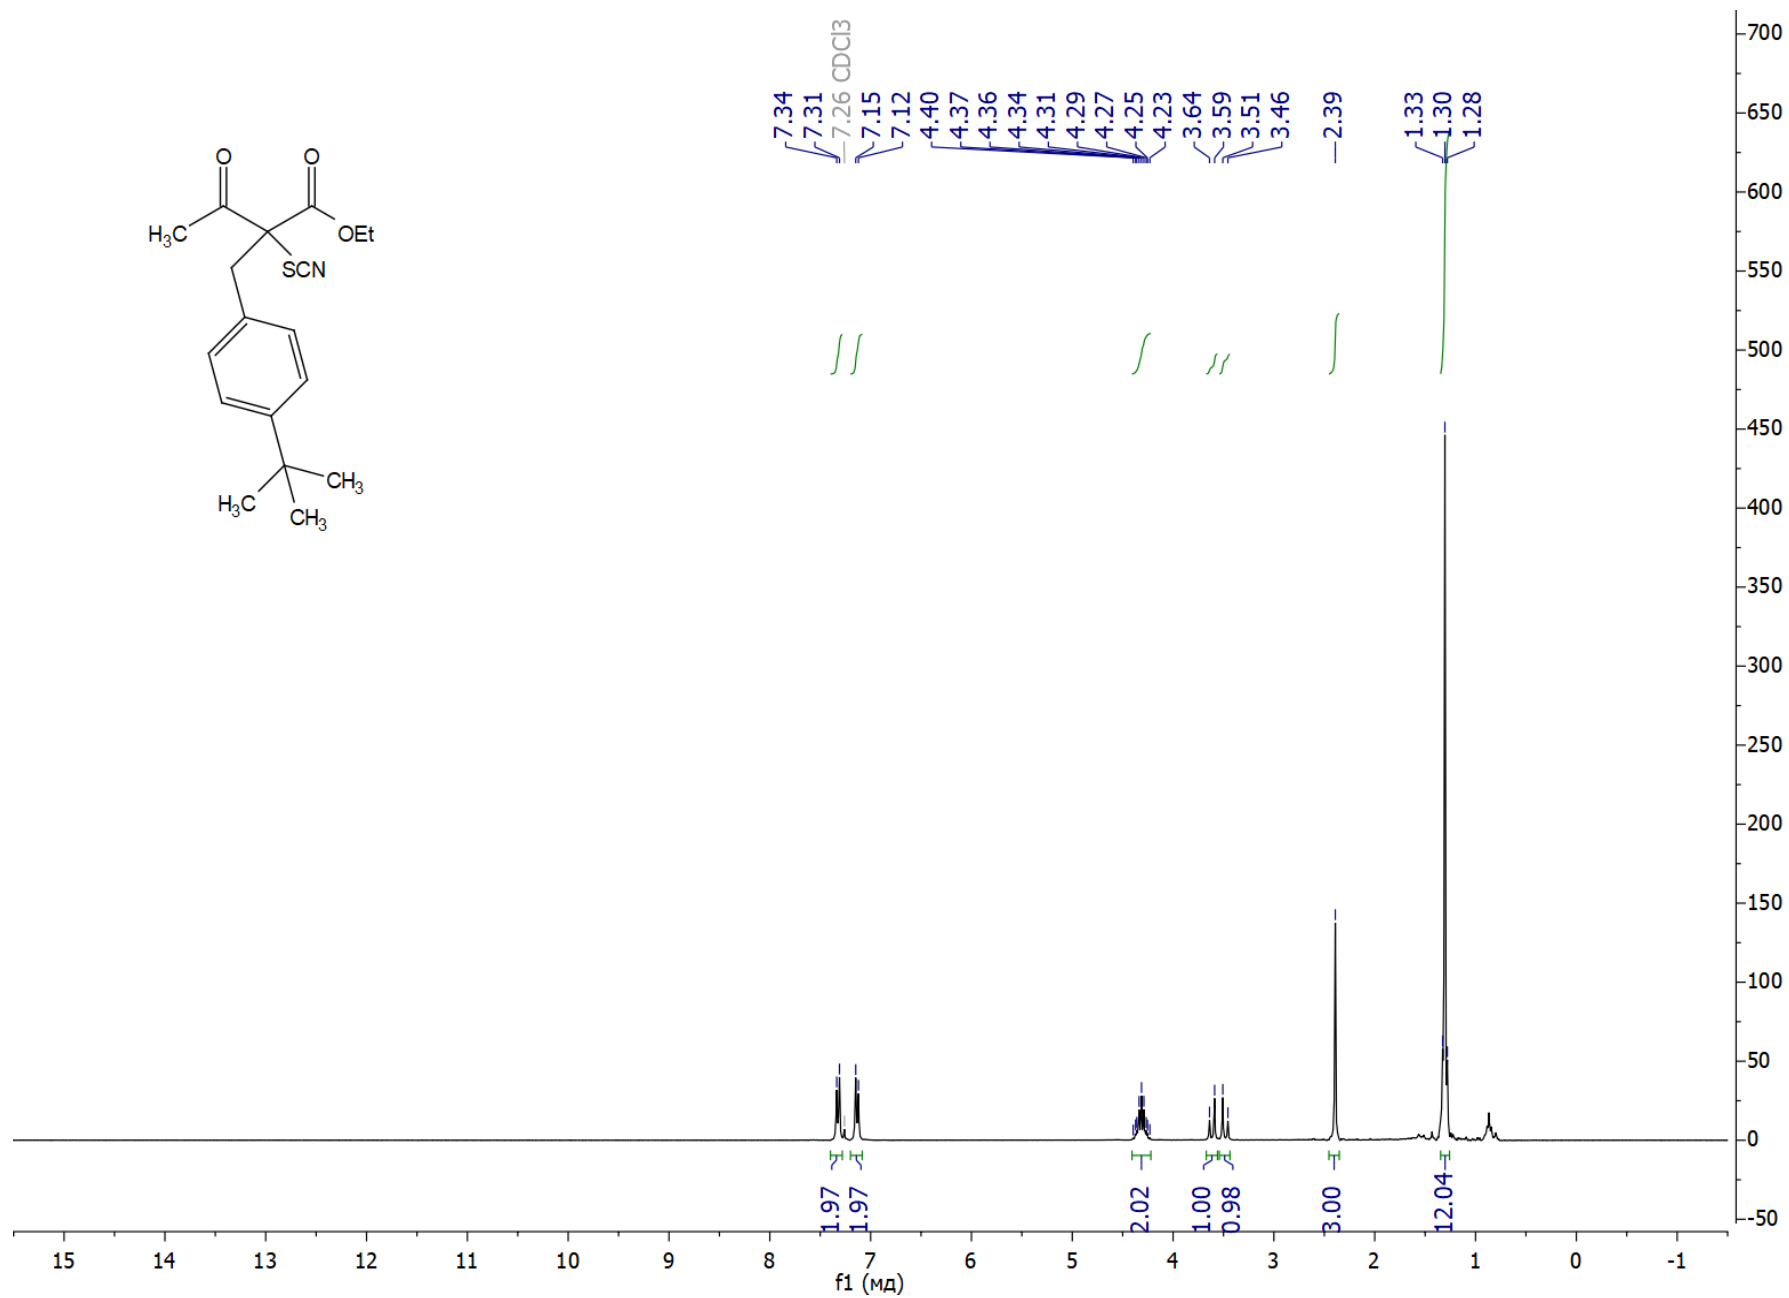

$^{13}\text{C}$  NMR (75.48 MHz,  $\text{CDCl}_3$ ) spectrum of ethyl 2-(4-(*tert*-butyl)benzyl)-3-oxo-2-thiocyanatobutanoate, **2k**

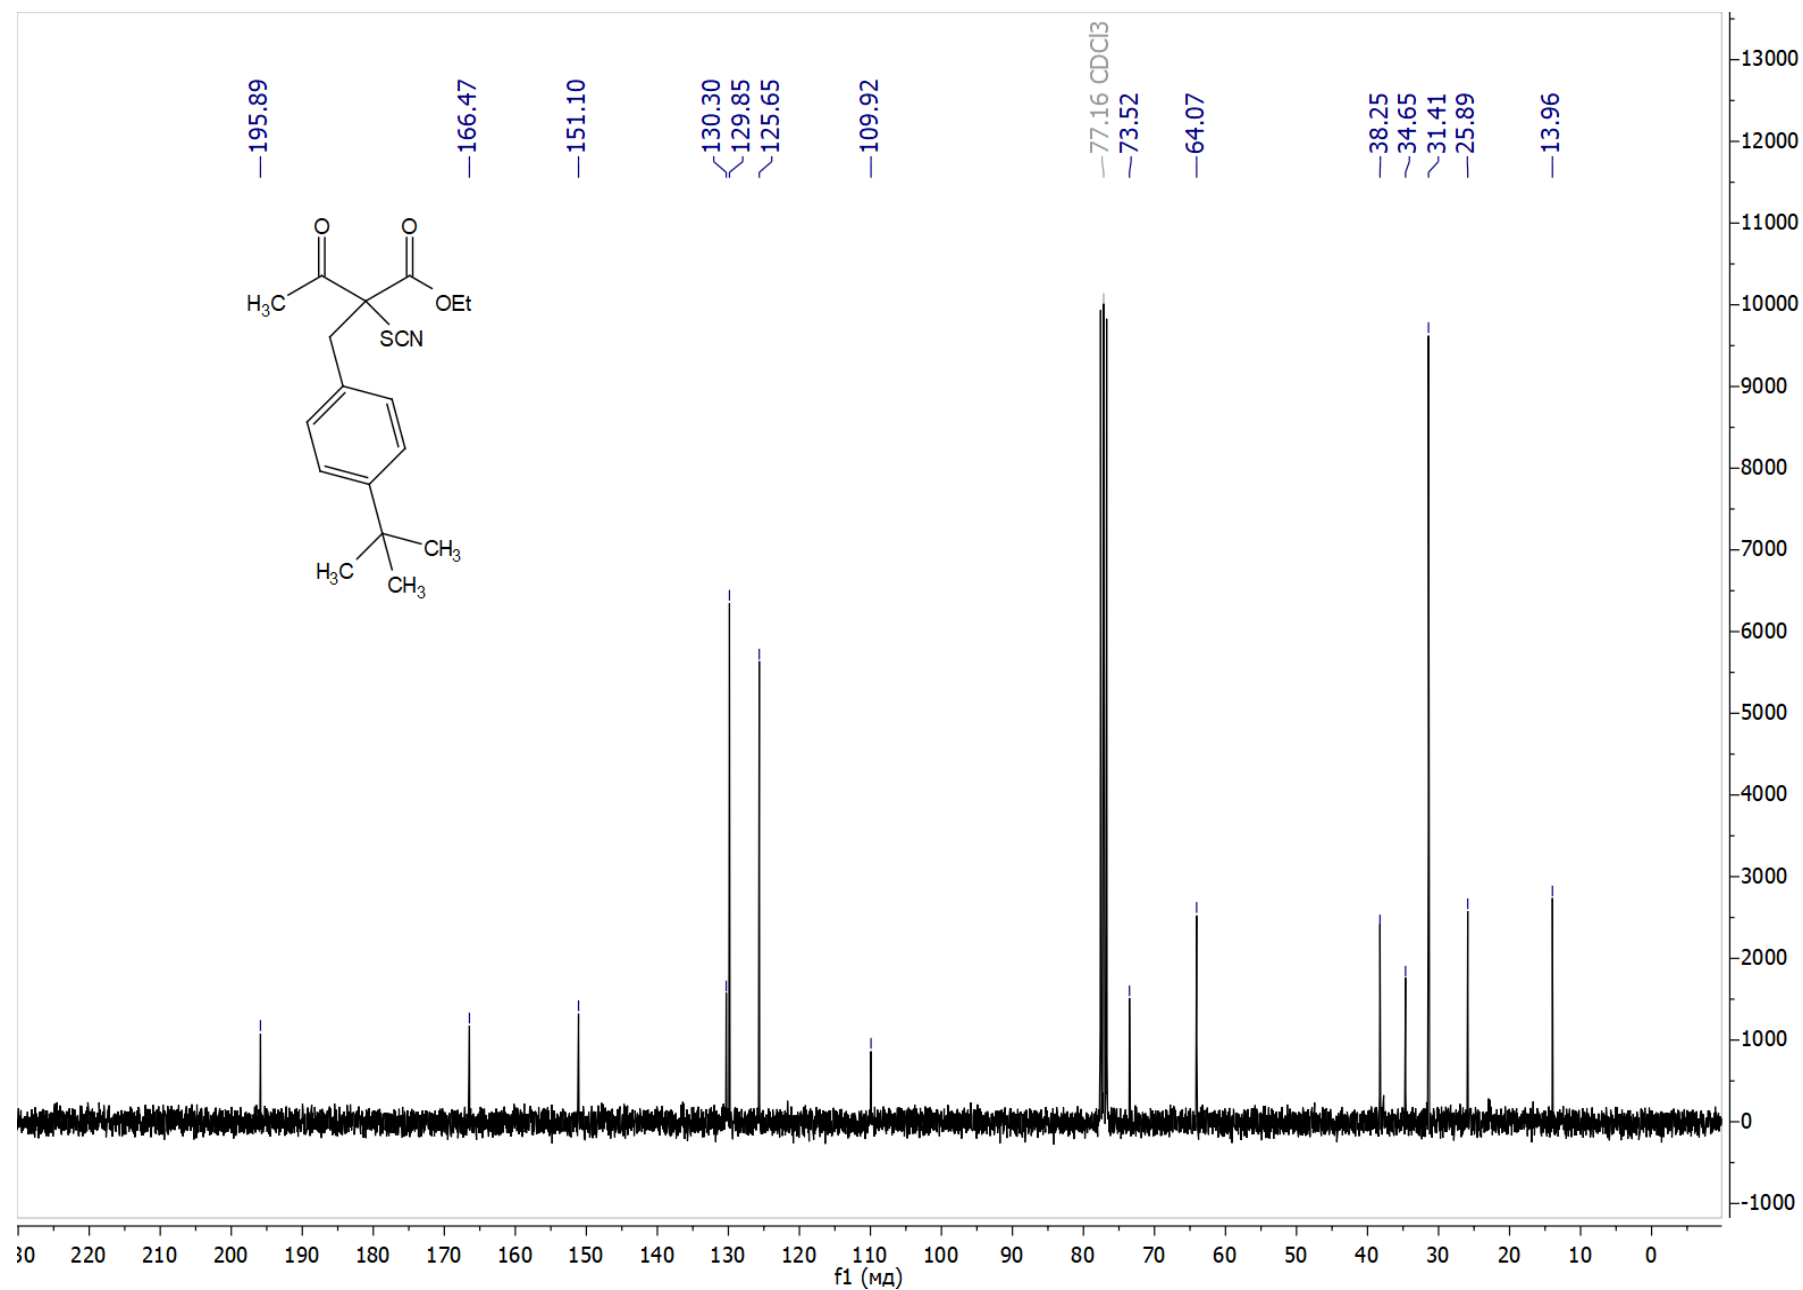

<sup>1</sup>H NMR (300.13 MHz, CDCl<sub>3</sub>) spectrum of ethyl 2-(4-fluorobenzyl)-3-oxo-2-thiocyanatobutanoate, **2l**

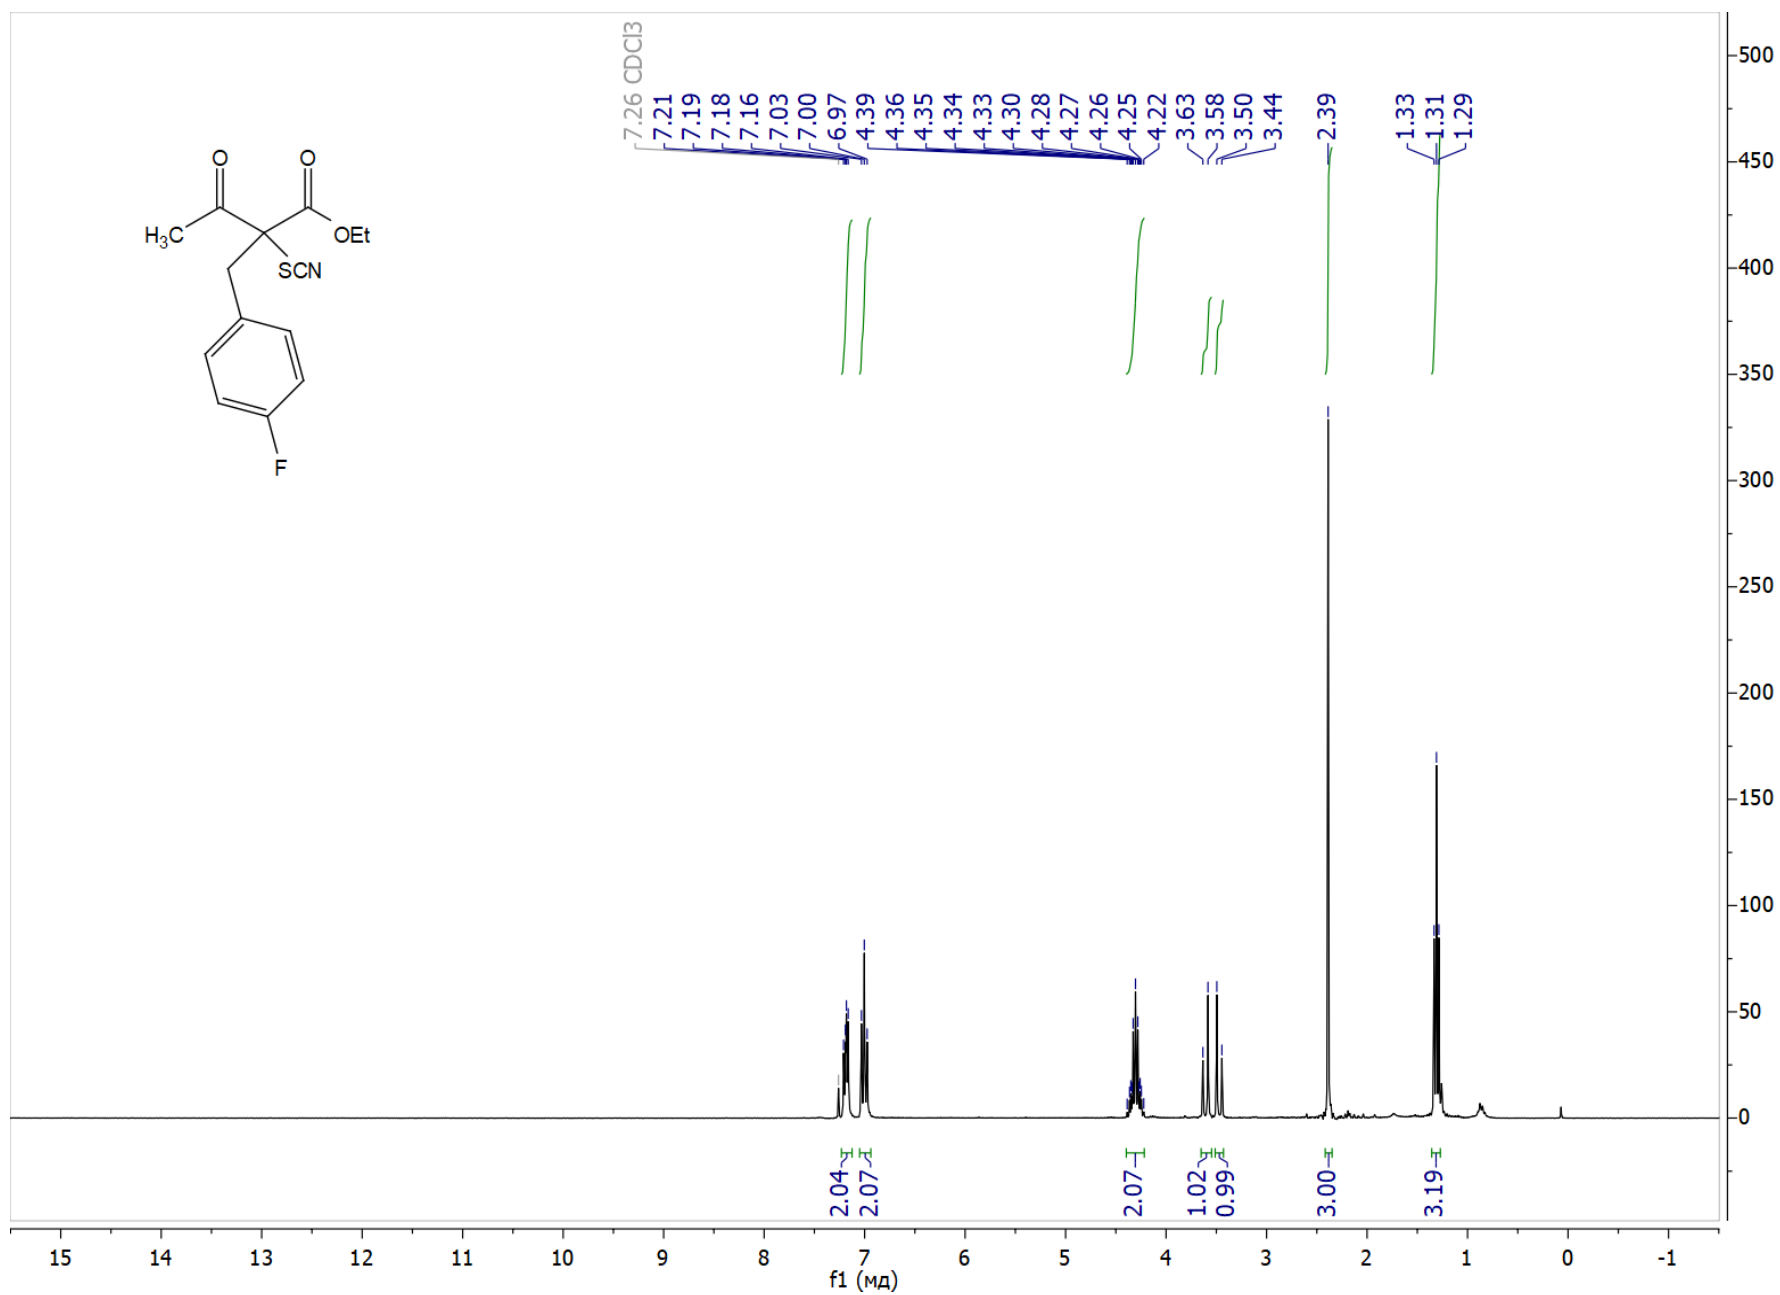

<sup>13</sup>C NMR (75.48 MHz, CDCl<sub>3</sub>) spectrum of ethyl 2-(4-fluorobenzyl)-3-oxo-2-thiocyanatobutanoate, **2I**

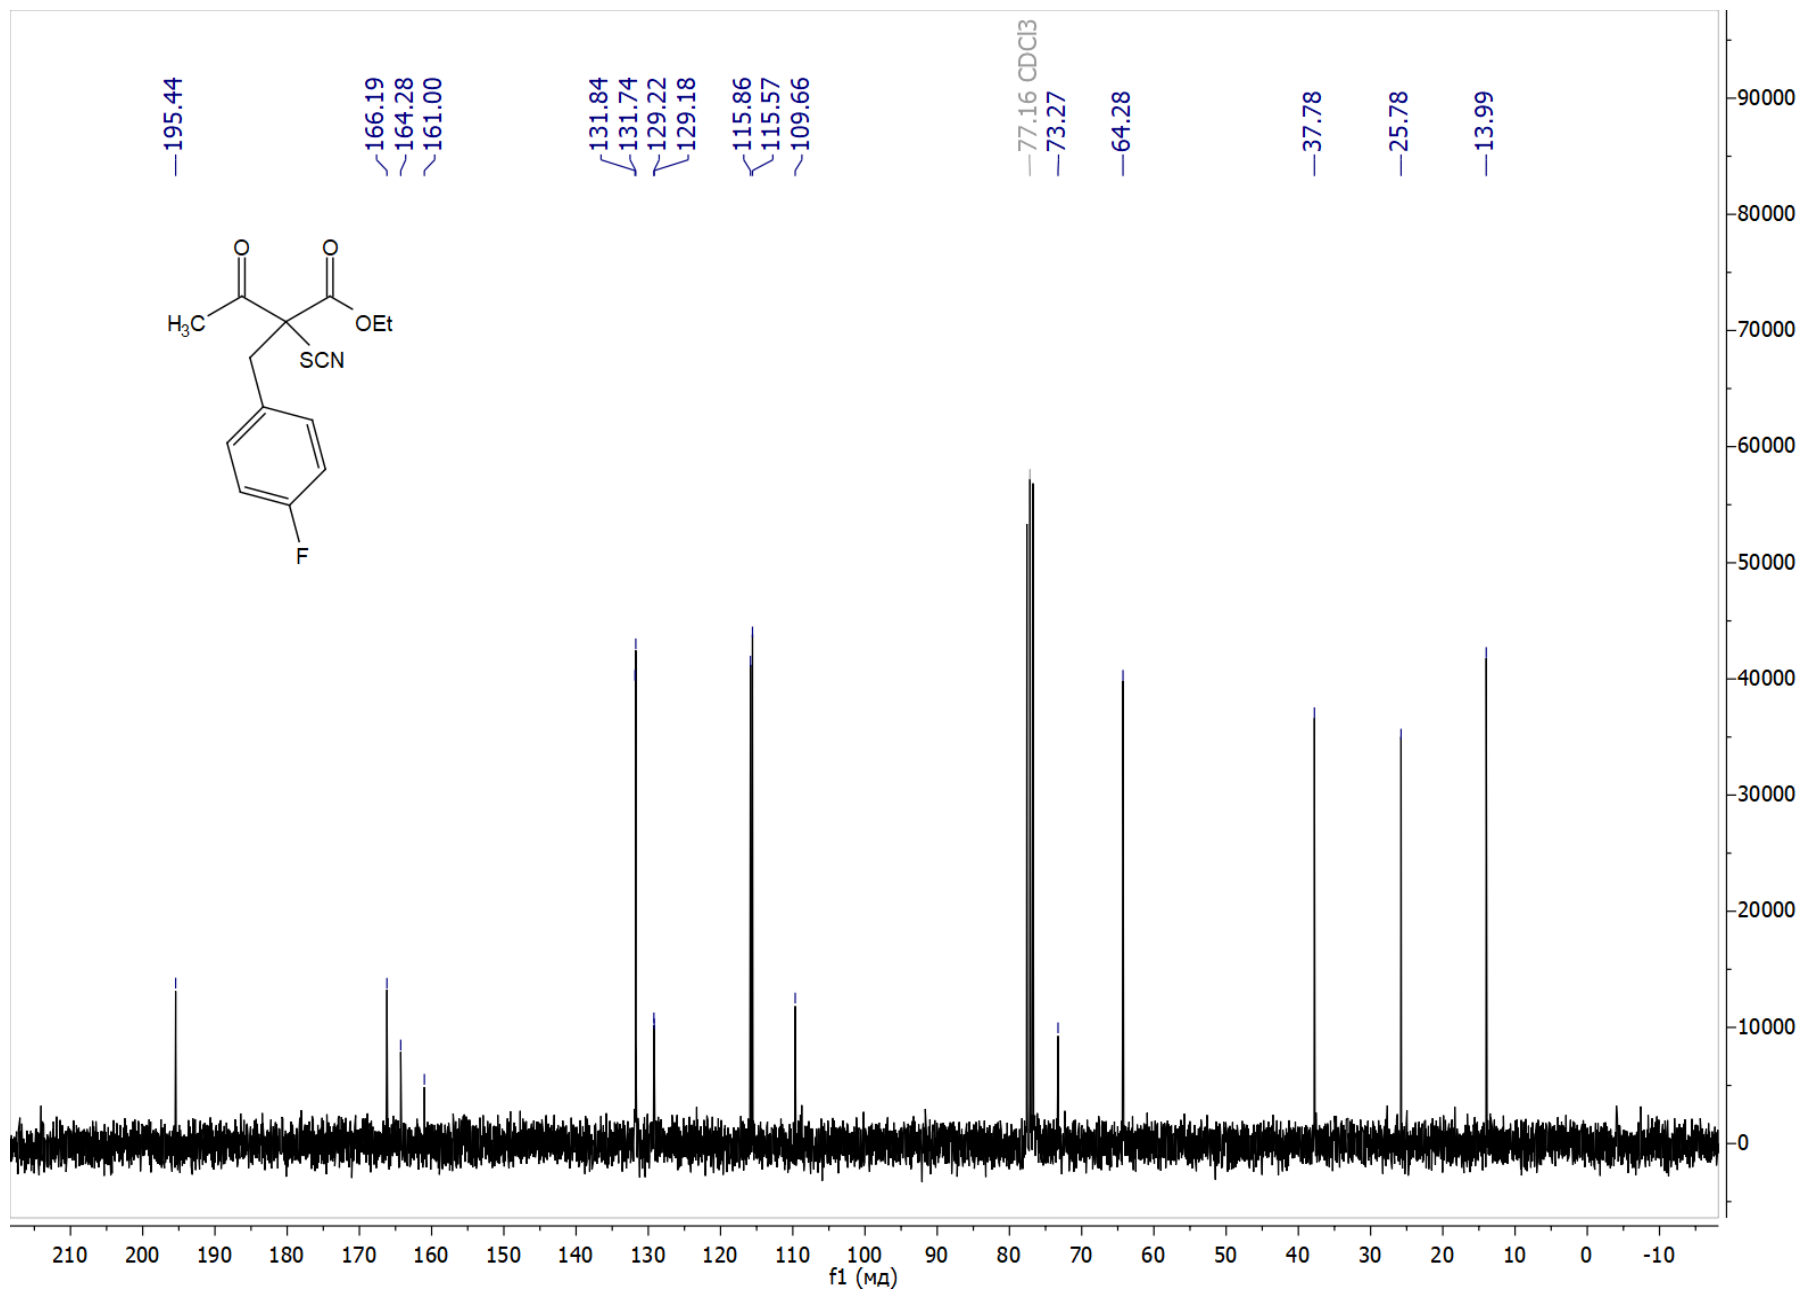

S40

$^{19}\text{F}$  NMR (282 MHz,  $\text{CDCl}_3$ ) spectrum of ethyl 2-(4-fluorobenzyl)-3-oxo-2-thiocyanatobutanoate, **2I**

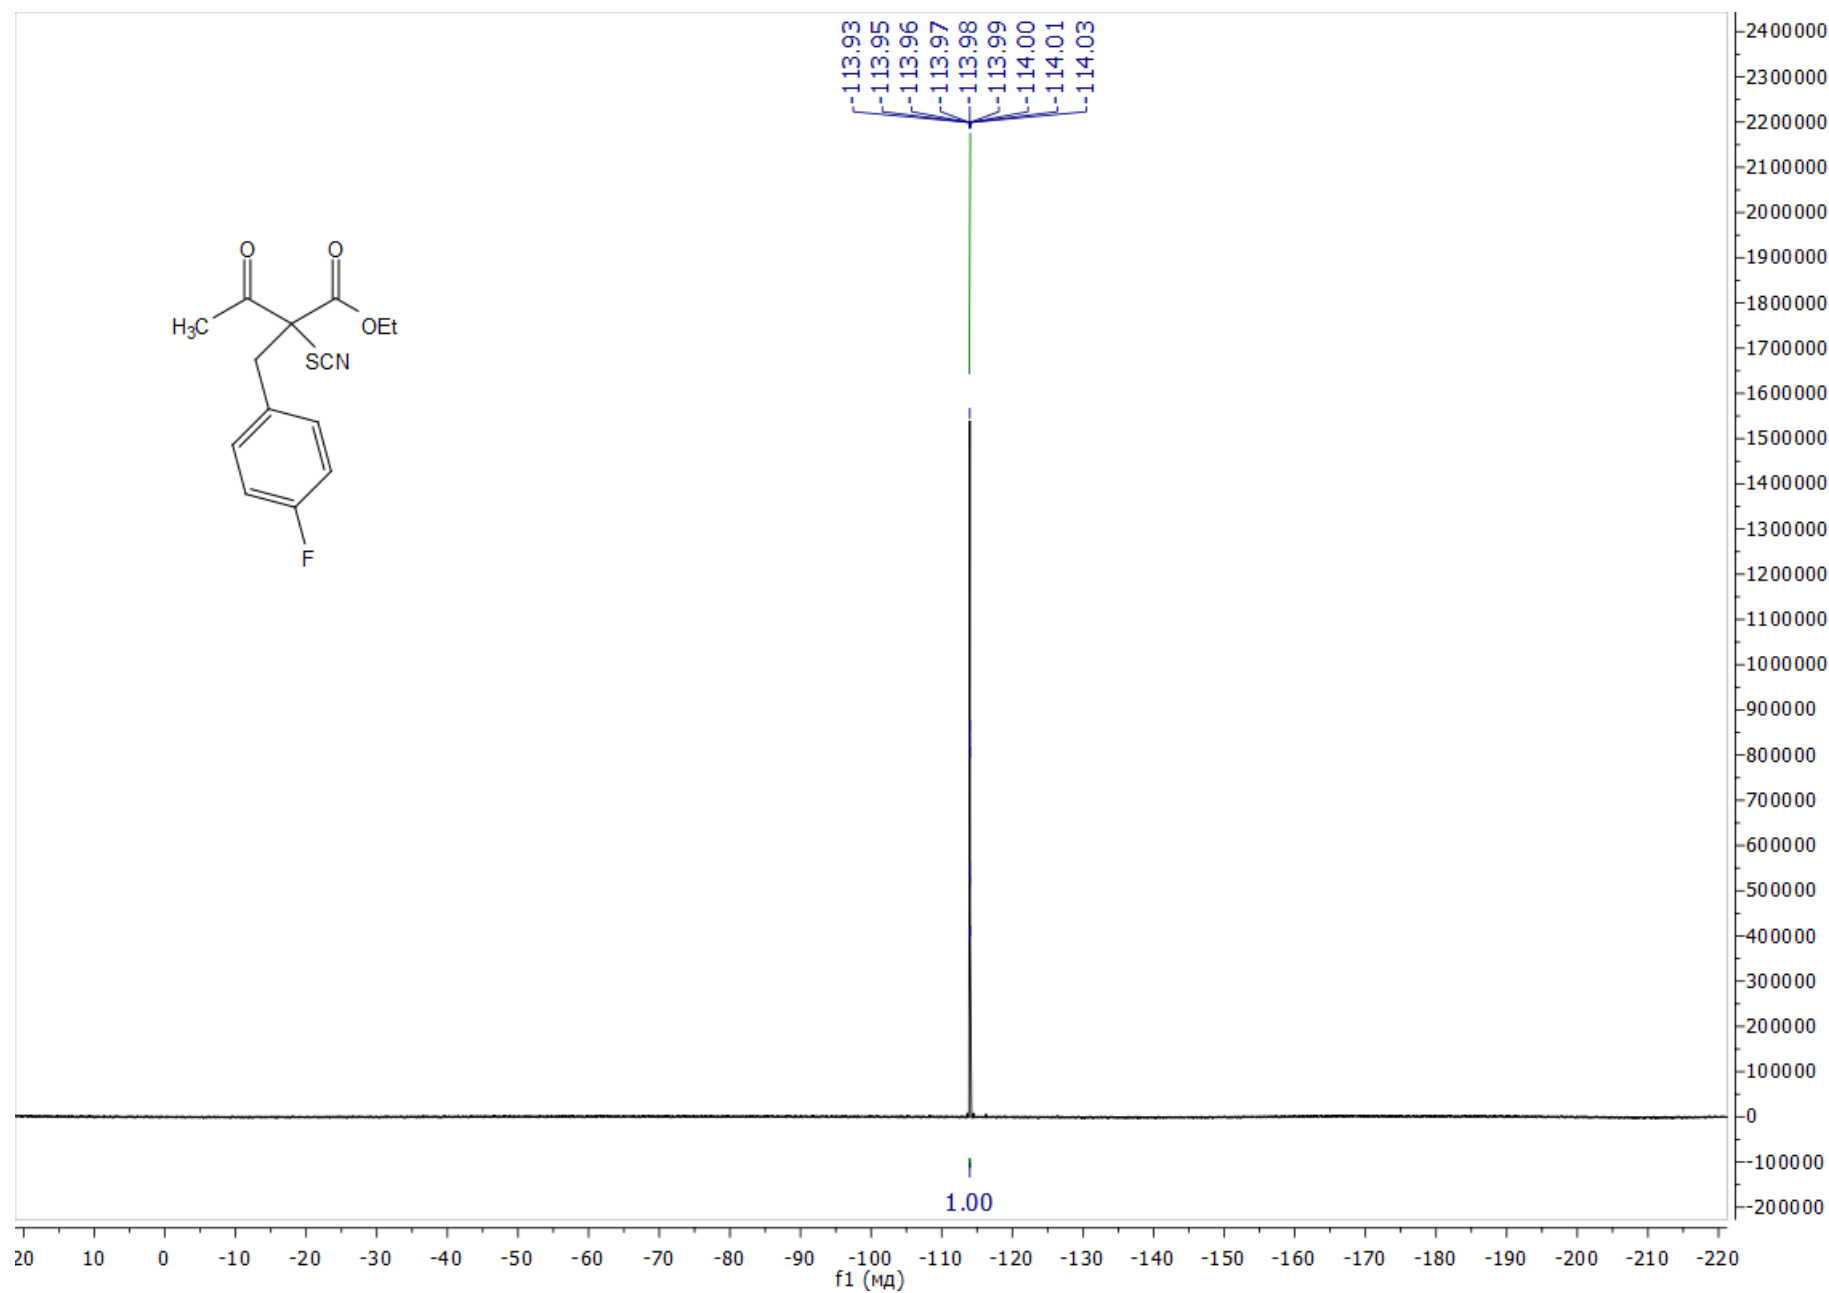

<sup>1</sup>H NMR (300.13 MHz, CDCl<sub>3</sub>) spectrum of ethyl 2-acetyl-2-thiocyanatohexanoate, **2m**

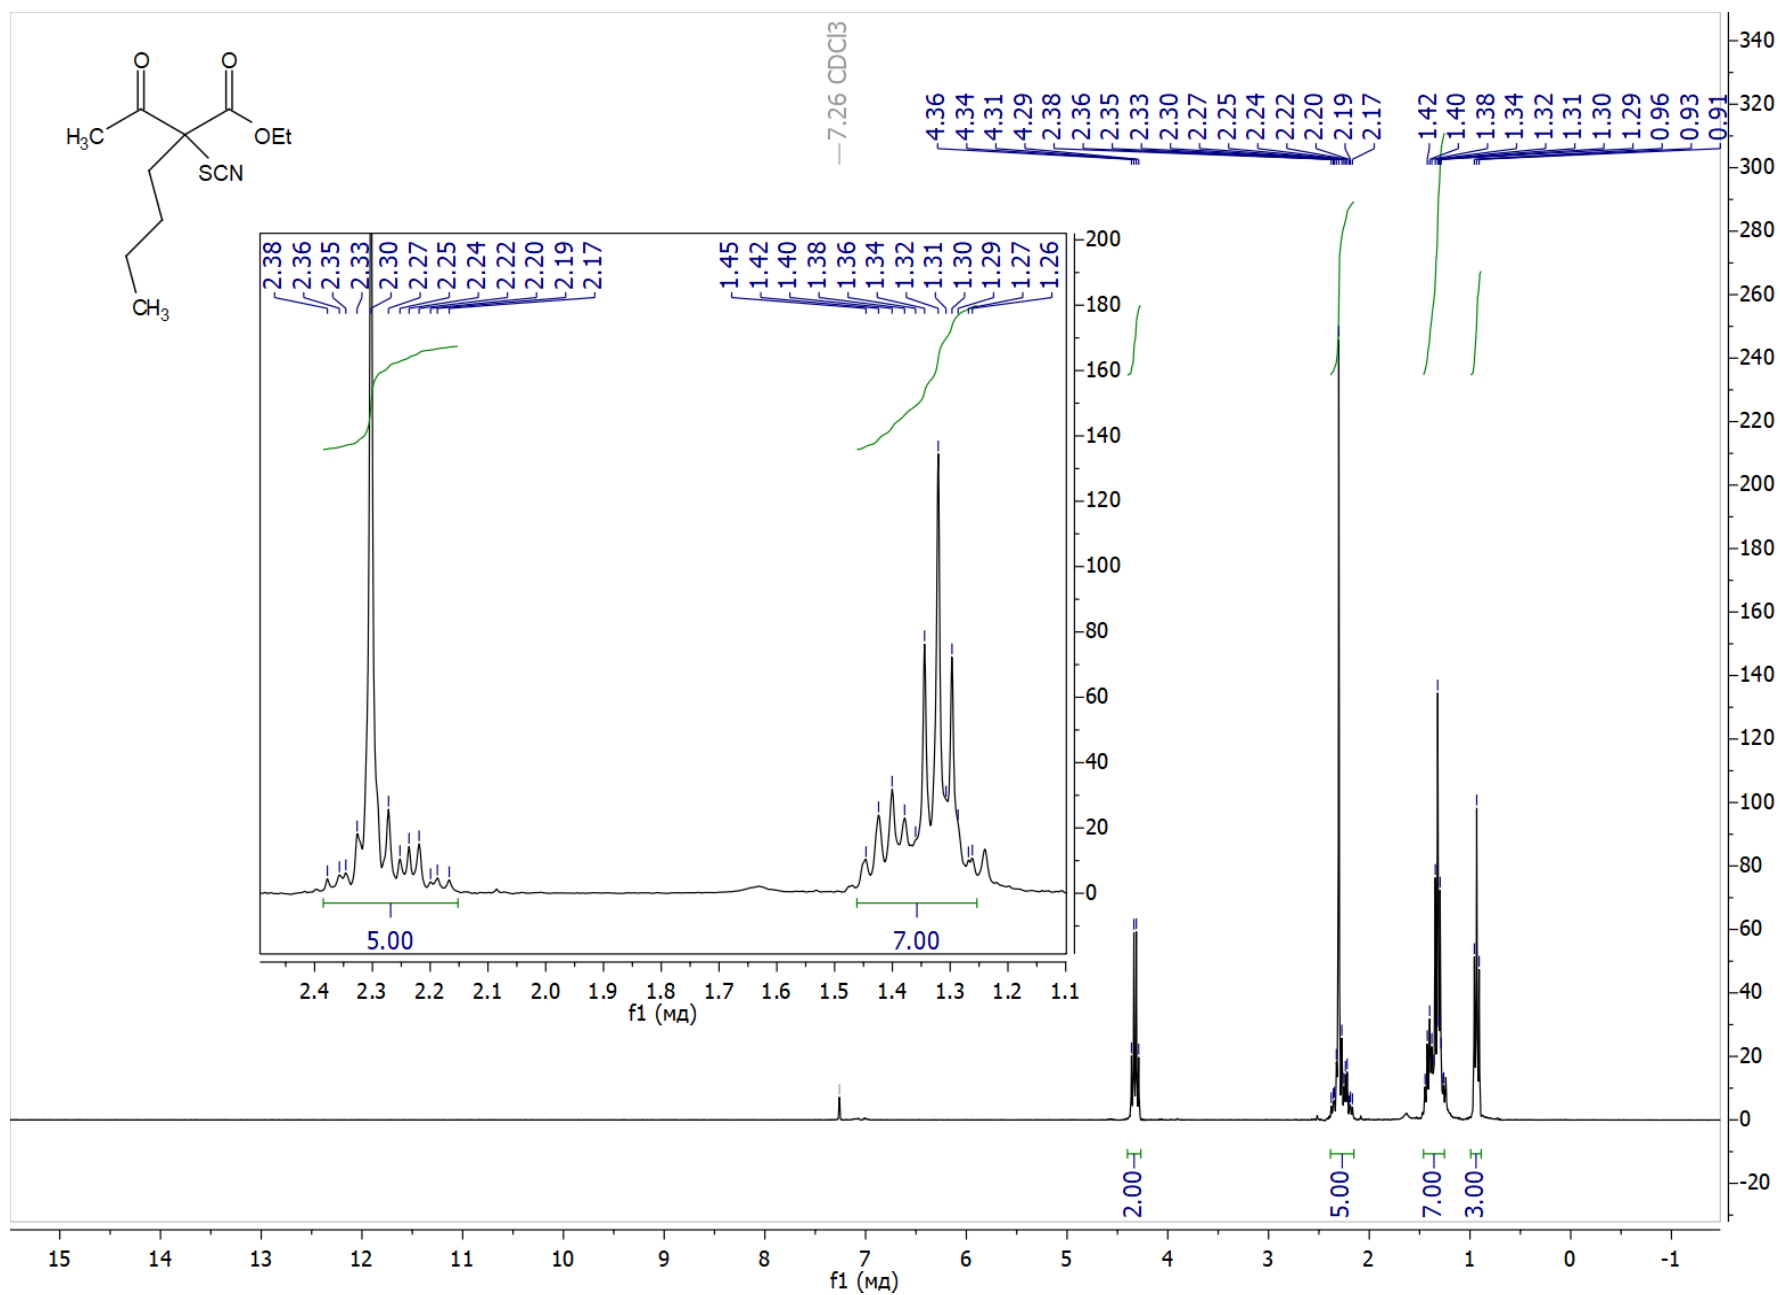

$^{13}\text{C}$  NMR (75.48 MHz,  $\text{CDCl}_3$ ) spectrum of ethyl 2-acetyl-2-thiocyanatohexanoate, **2m**

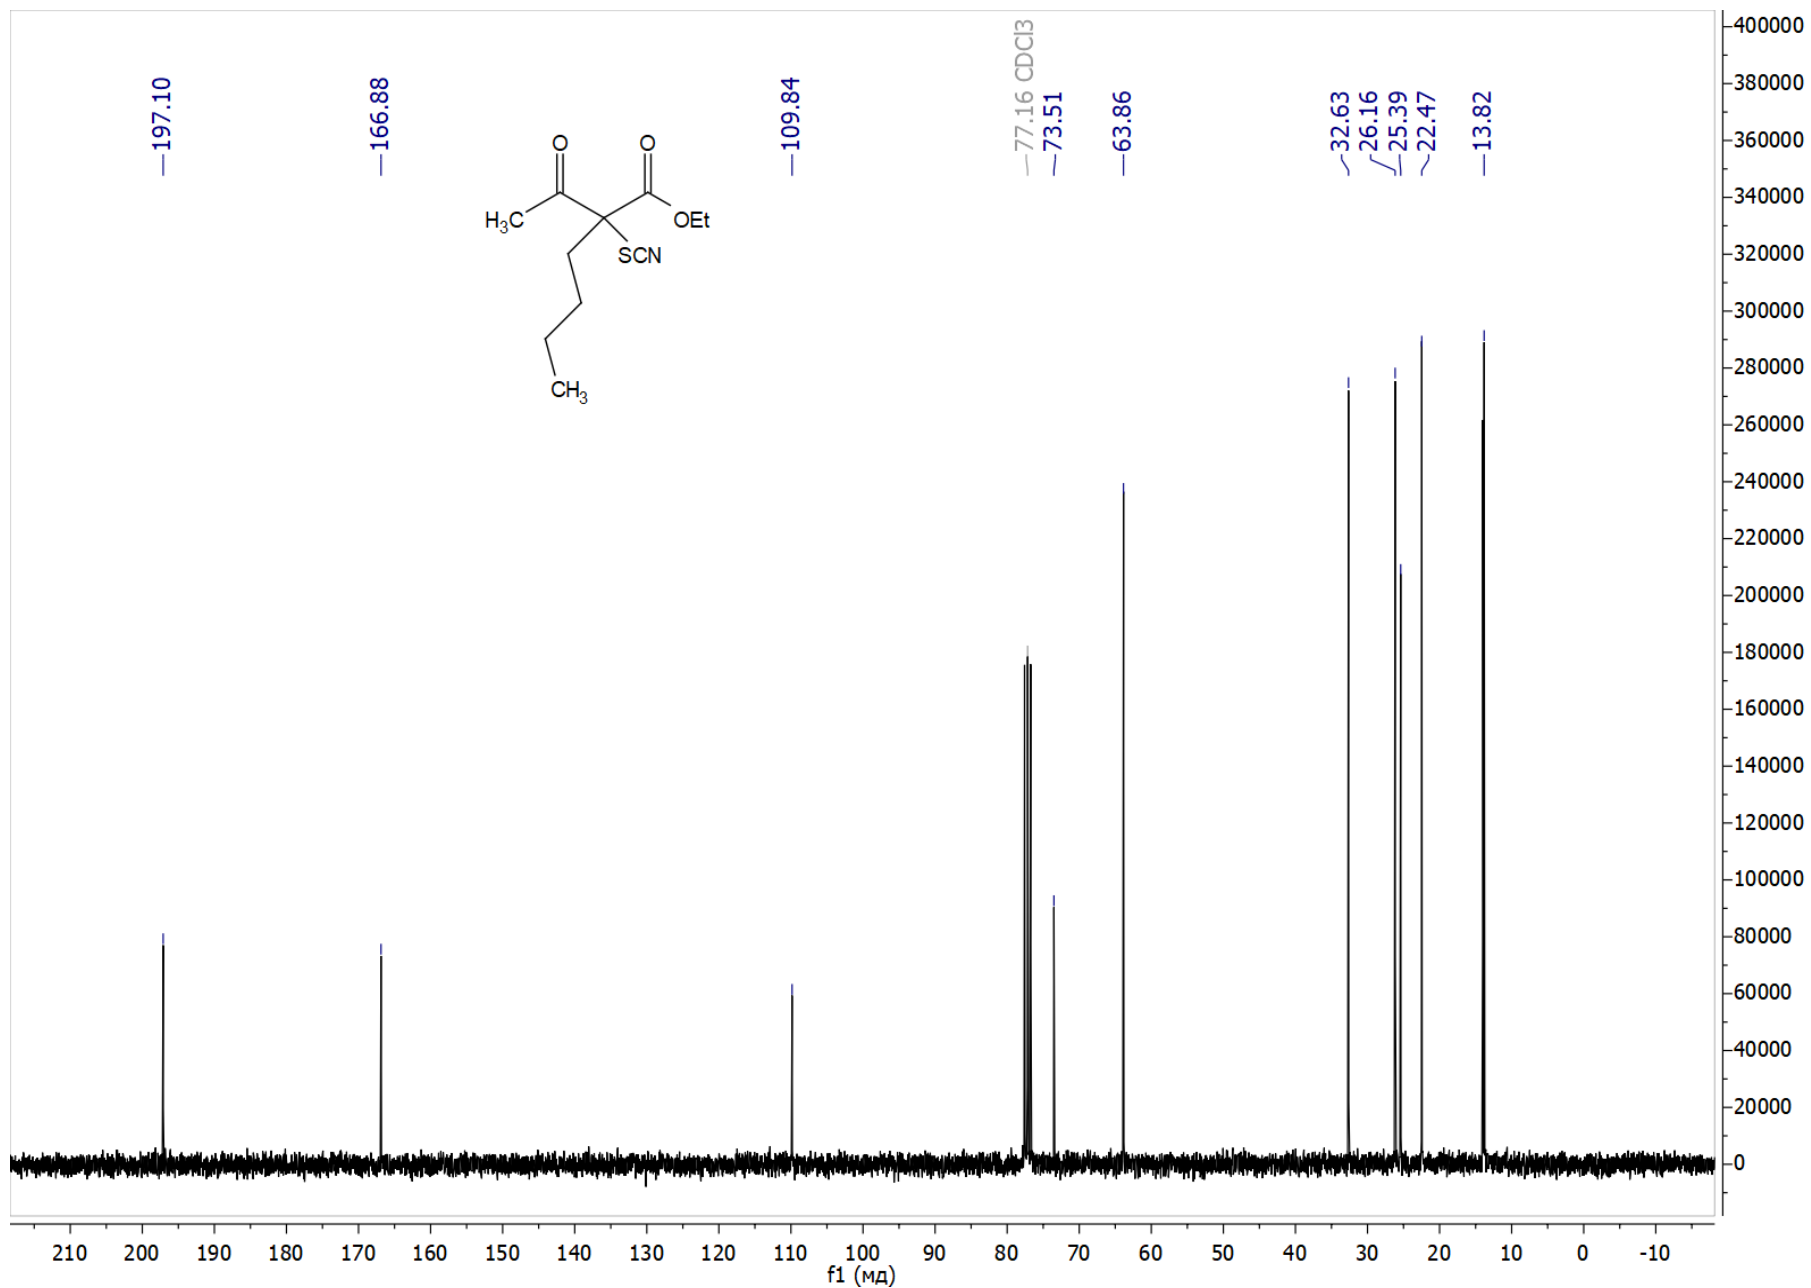

$^1\text{H}$  NMR (300.13 MHz,  $\text{CDCl}_3$ ) spectrum of ethyl 2-acetyl-2-thiocyanatoctanoate, **2n**

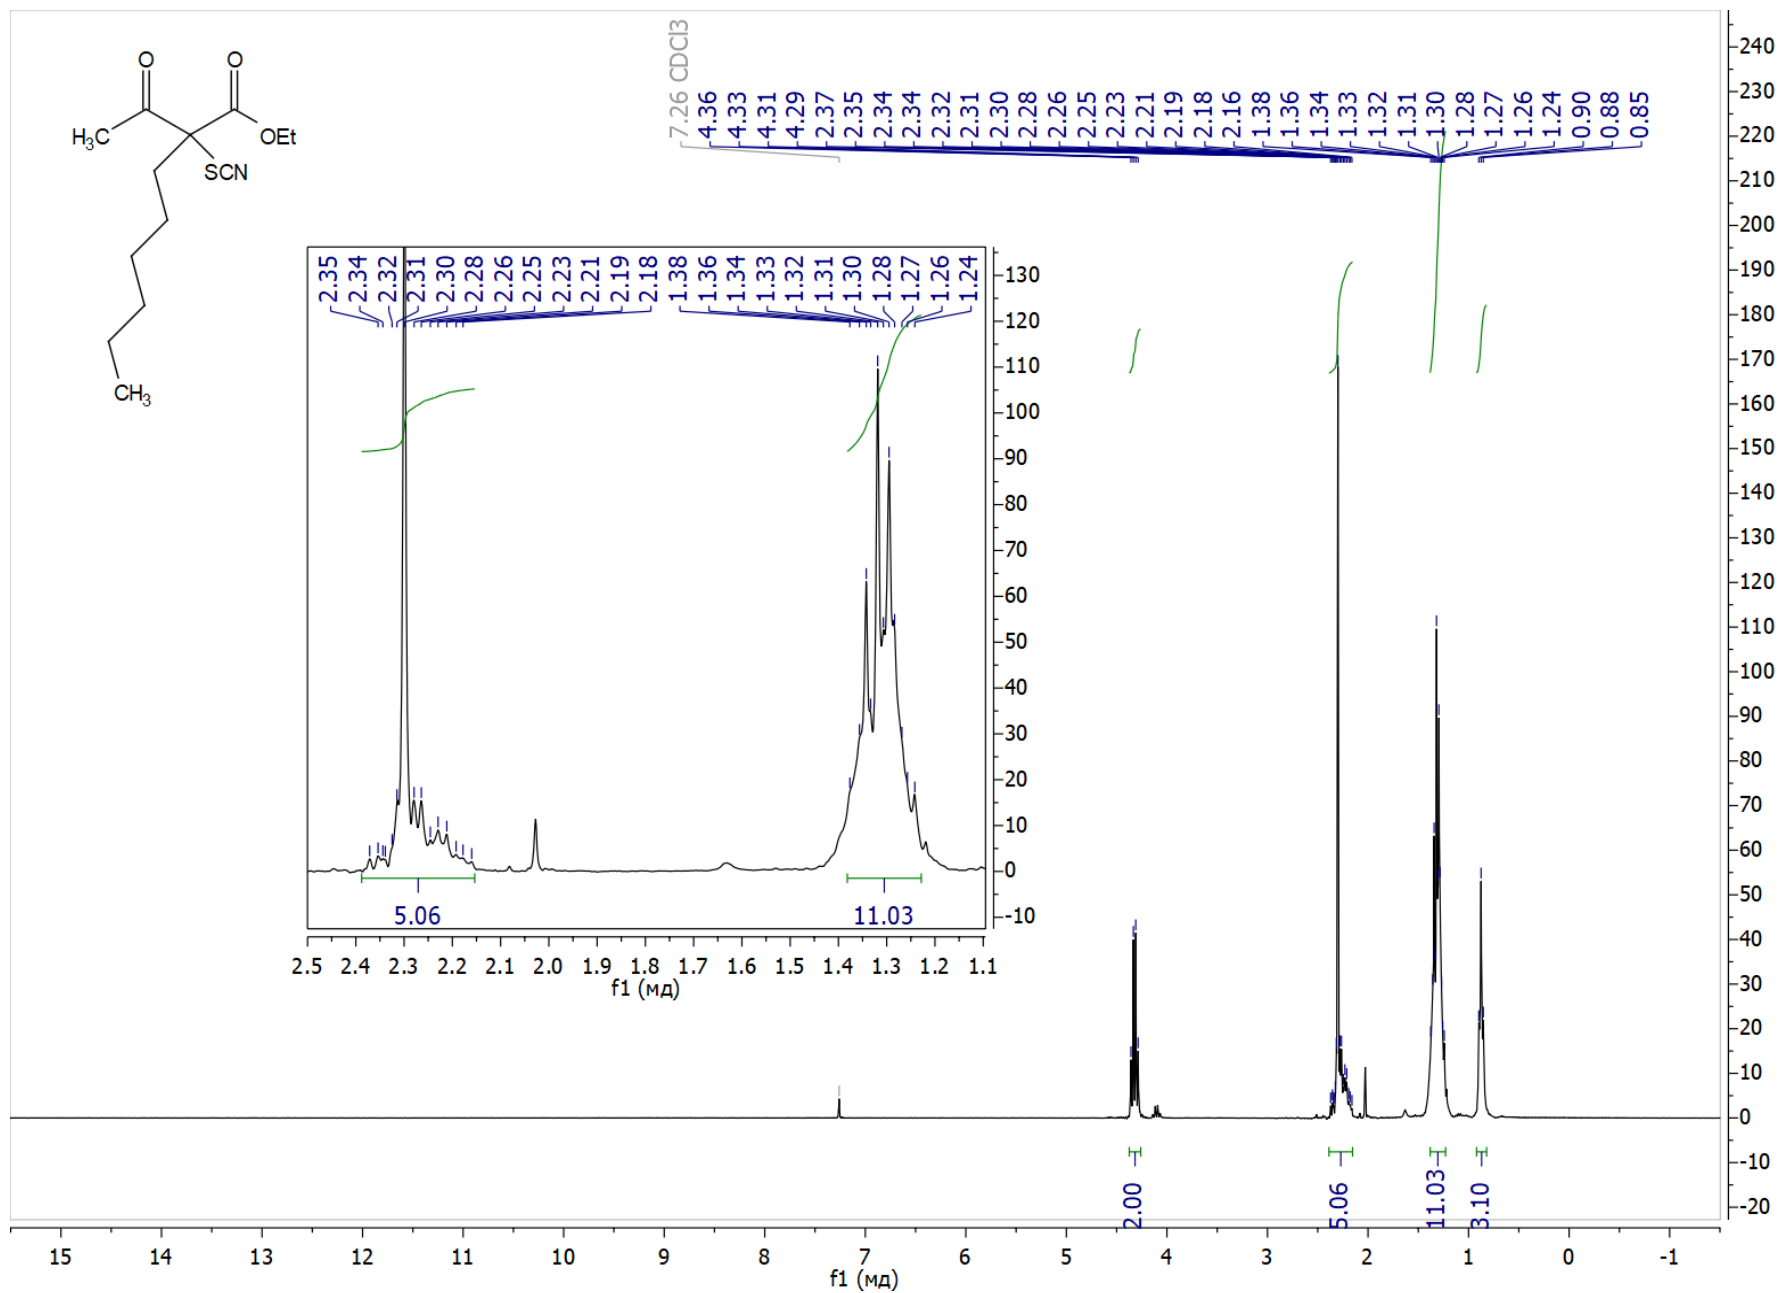

$^{13}\text{C}$  NMR (75.48 MHz,  $\text{CDCl}_3$ ) spectrum of ethyl 2-acetyl-2-thiocyanatoctanoate, **2n**

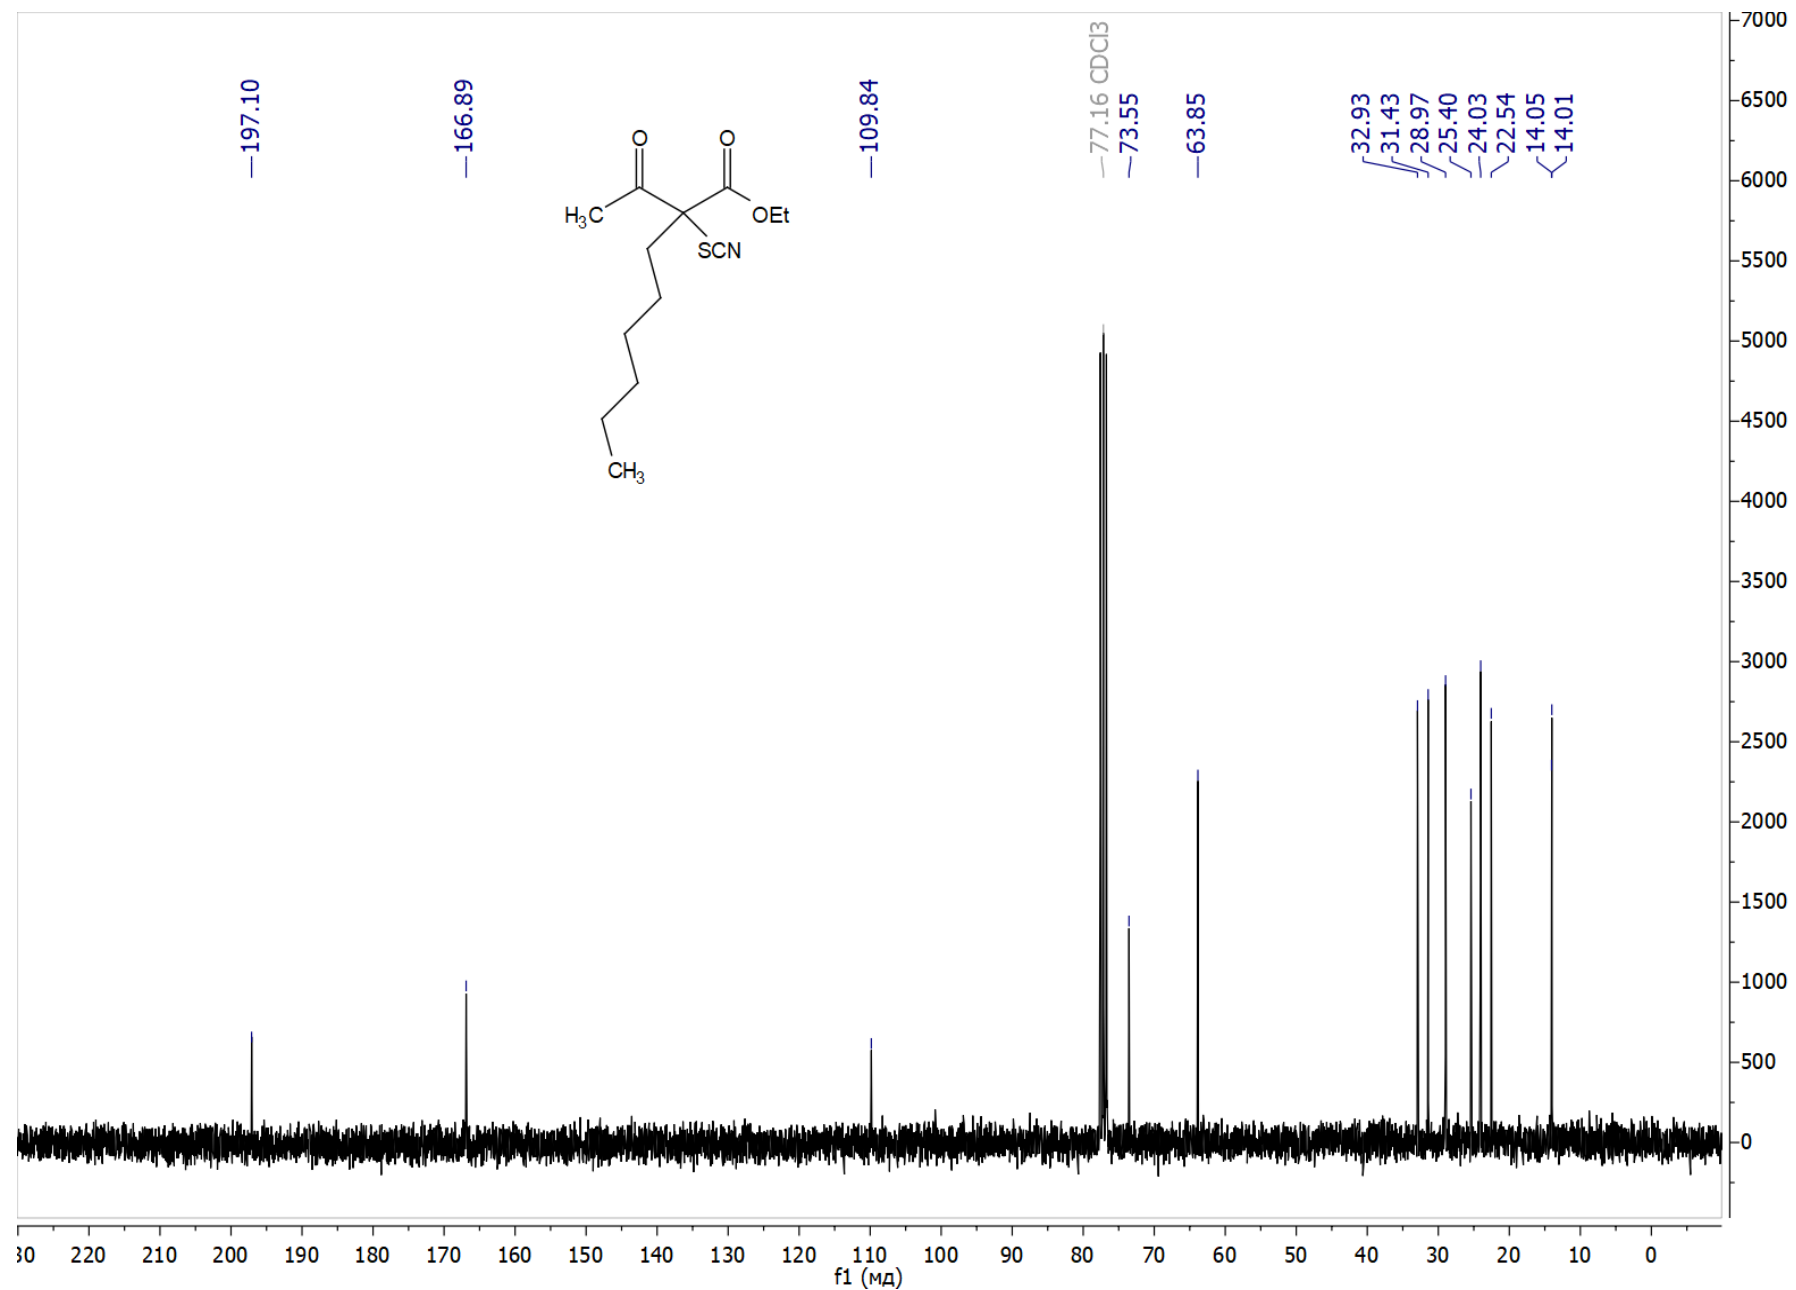

<sup>1</sup>H NMR (300.13 MHz, CDCl<sub>3</sub>) spectrum of ethyl 2-acetyl-2-thiocyanatoundecanoate, **2o**

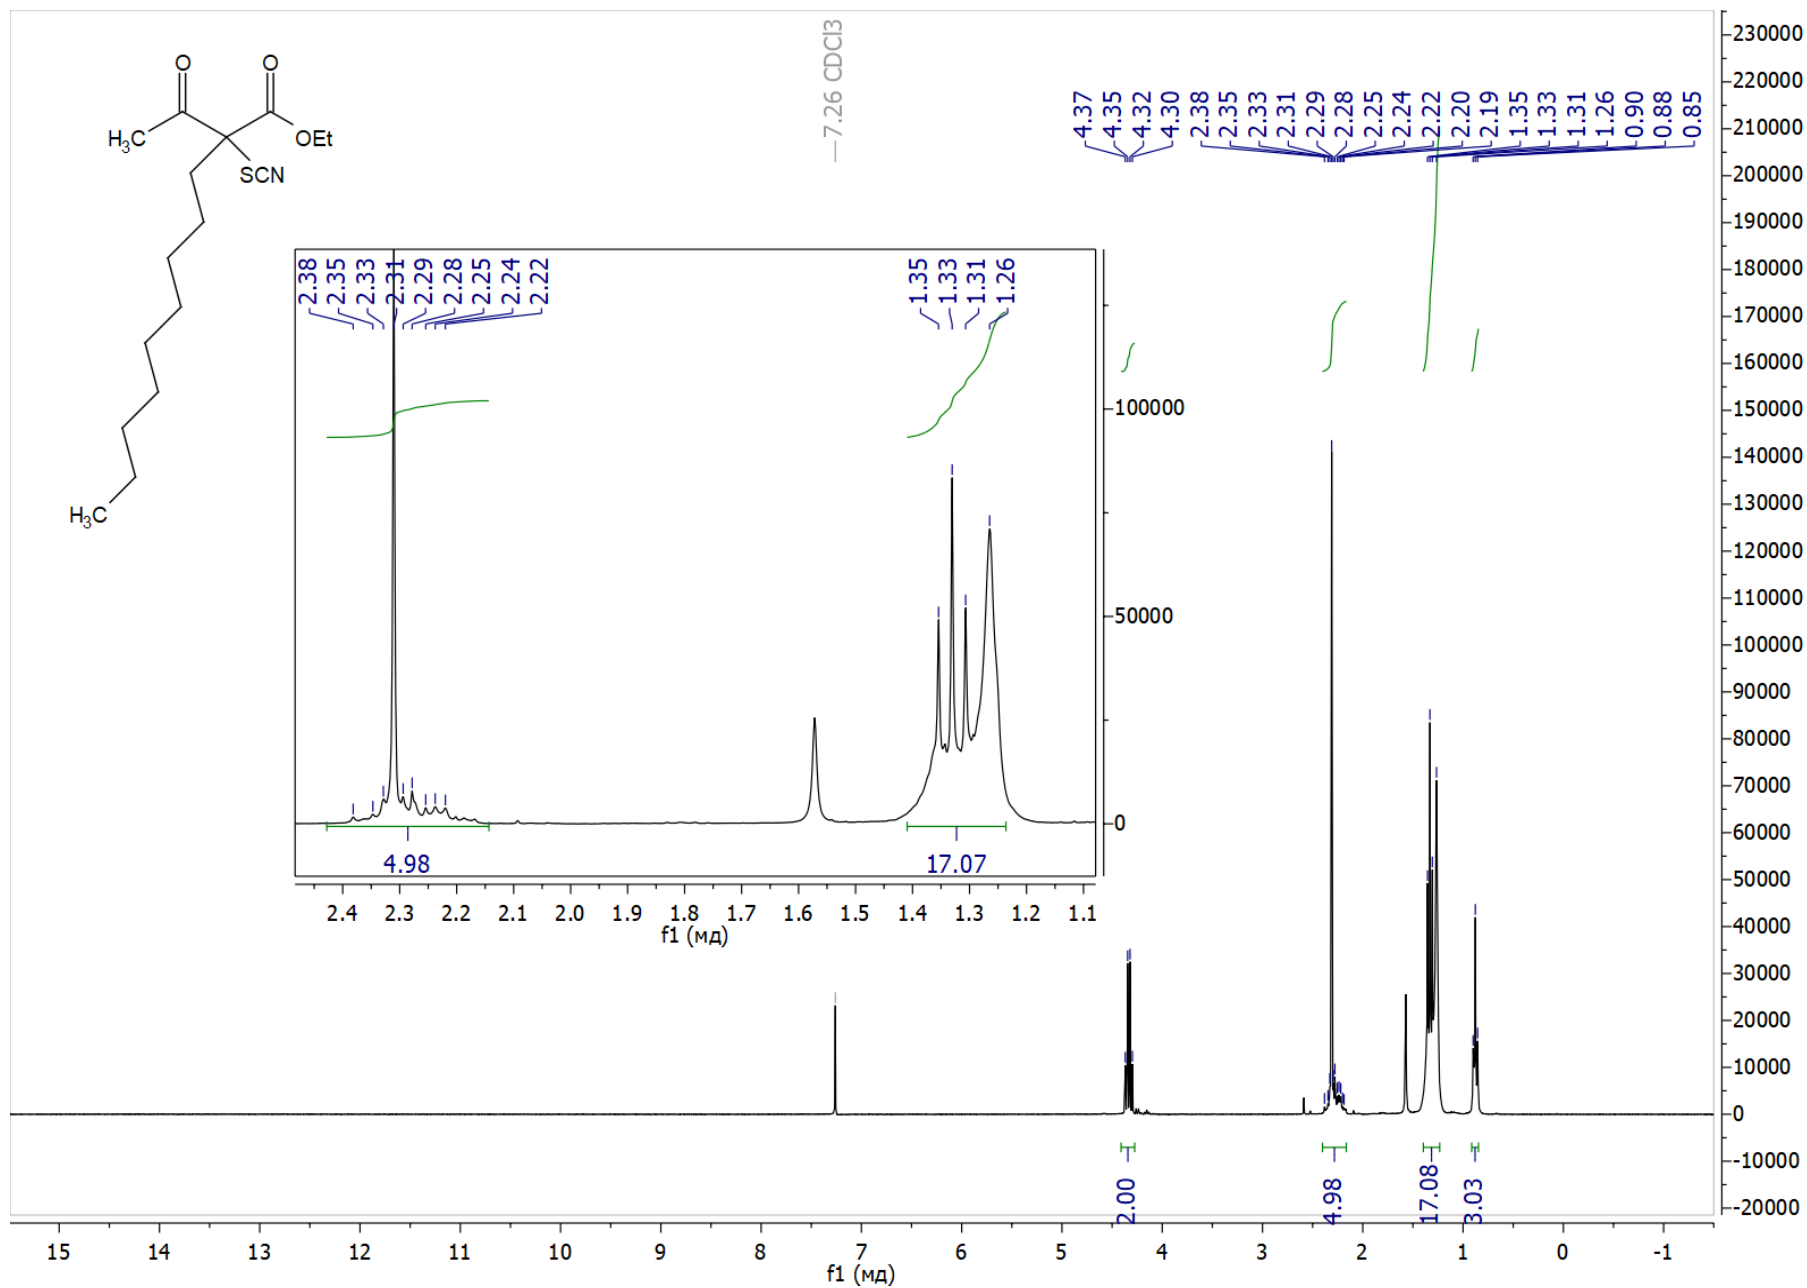

$^{13}\text{C}$  NMR (75.48 MHz,  $\text{CDCl}_3$ ) spectrum of ethyl 2-acetyl-2-thiocyanatoundecanoate, **2o**

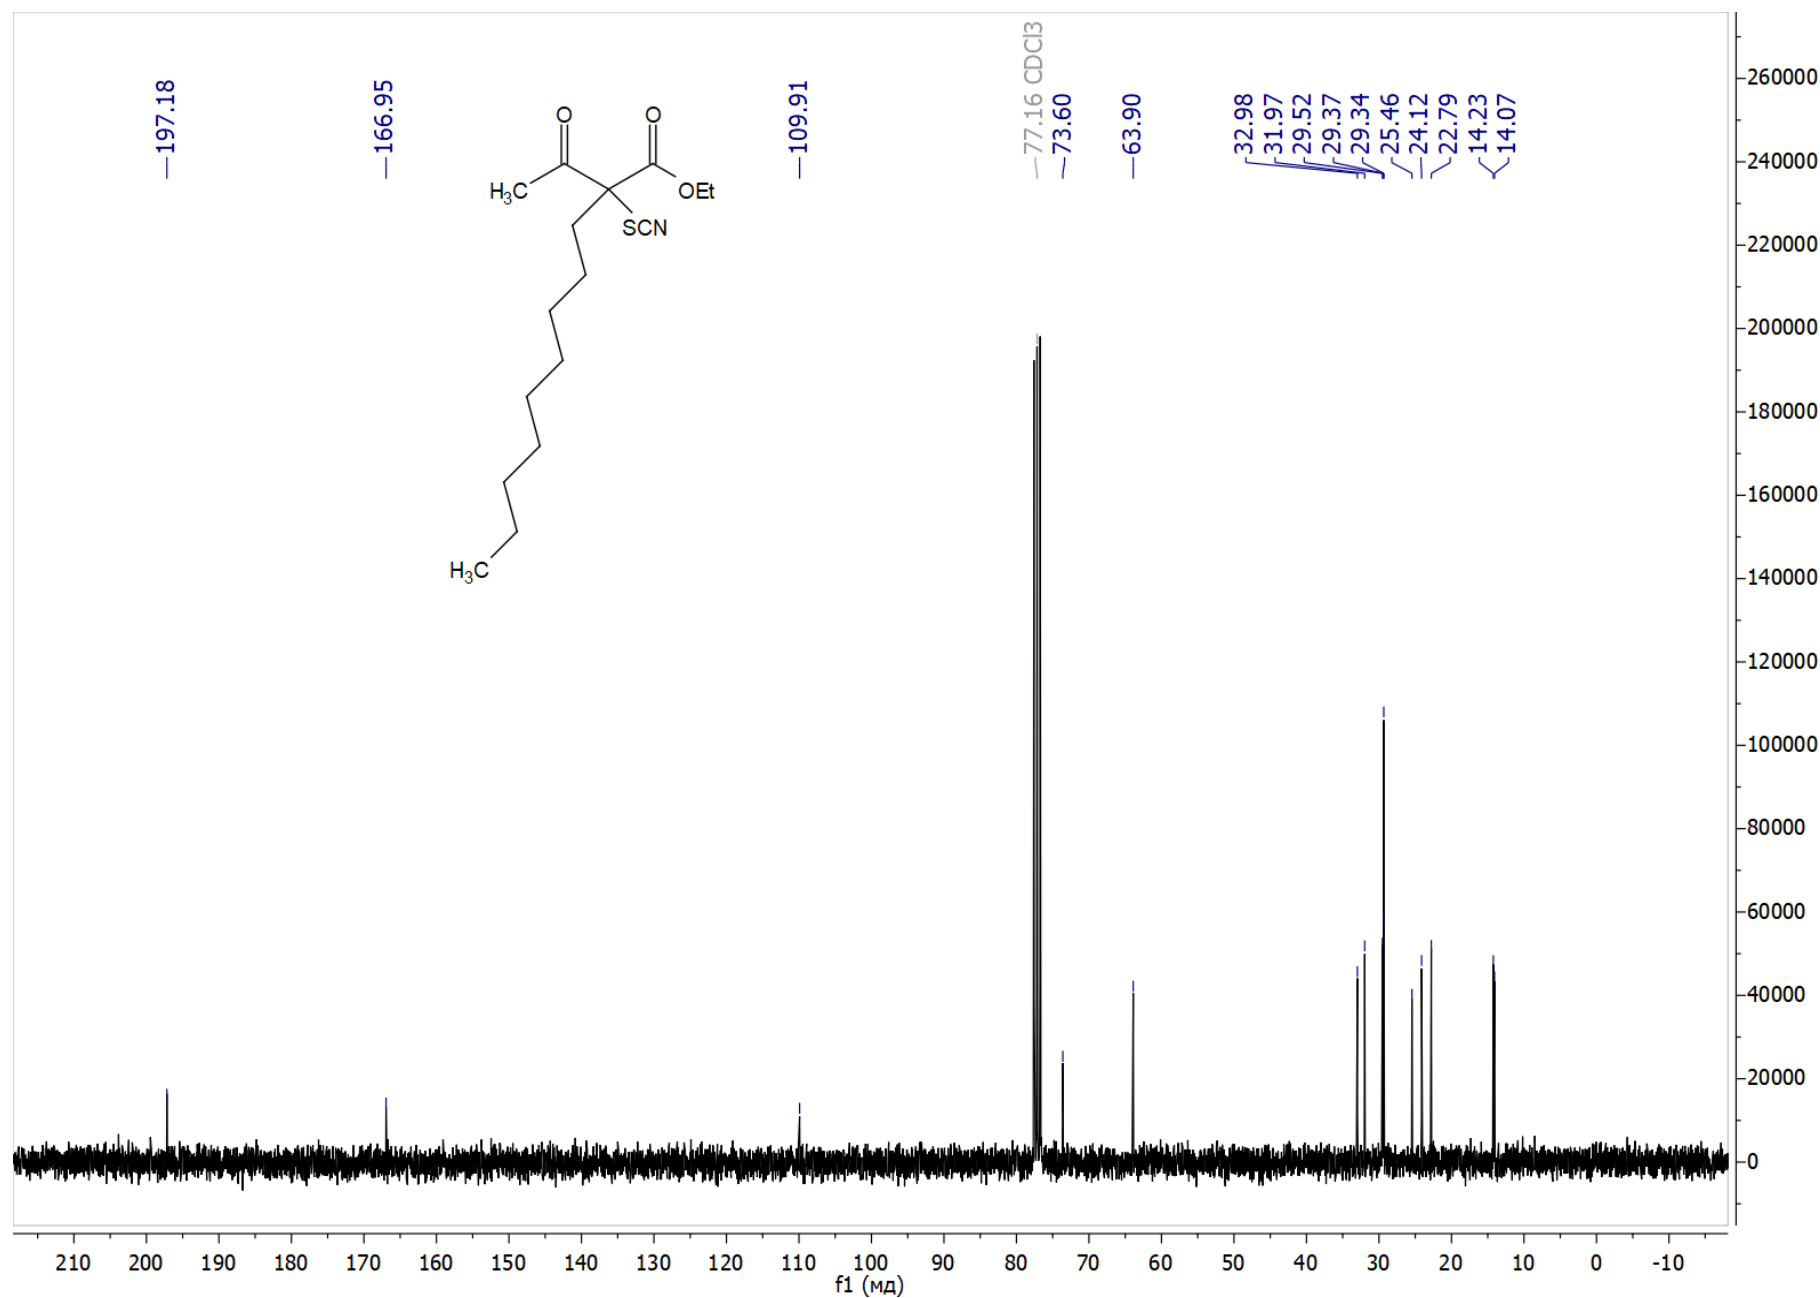

$^1\text{H}$  NMR (300.13 MHz,  $\text{CDCl}_3$ ) spectrum of ethyl 2-acetyl-5-methyl-2-thiocyanatohexanoate, **2p**

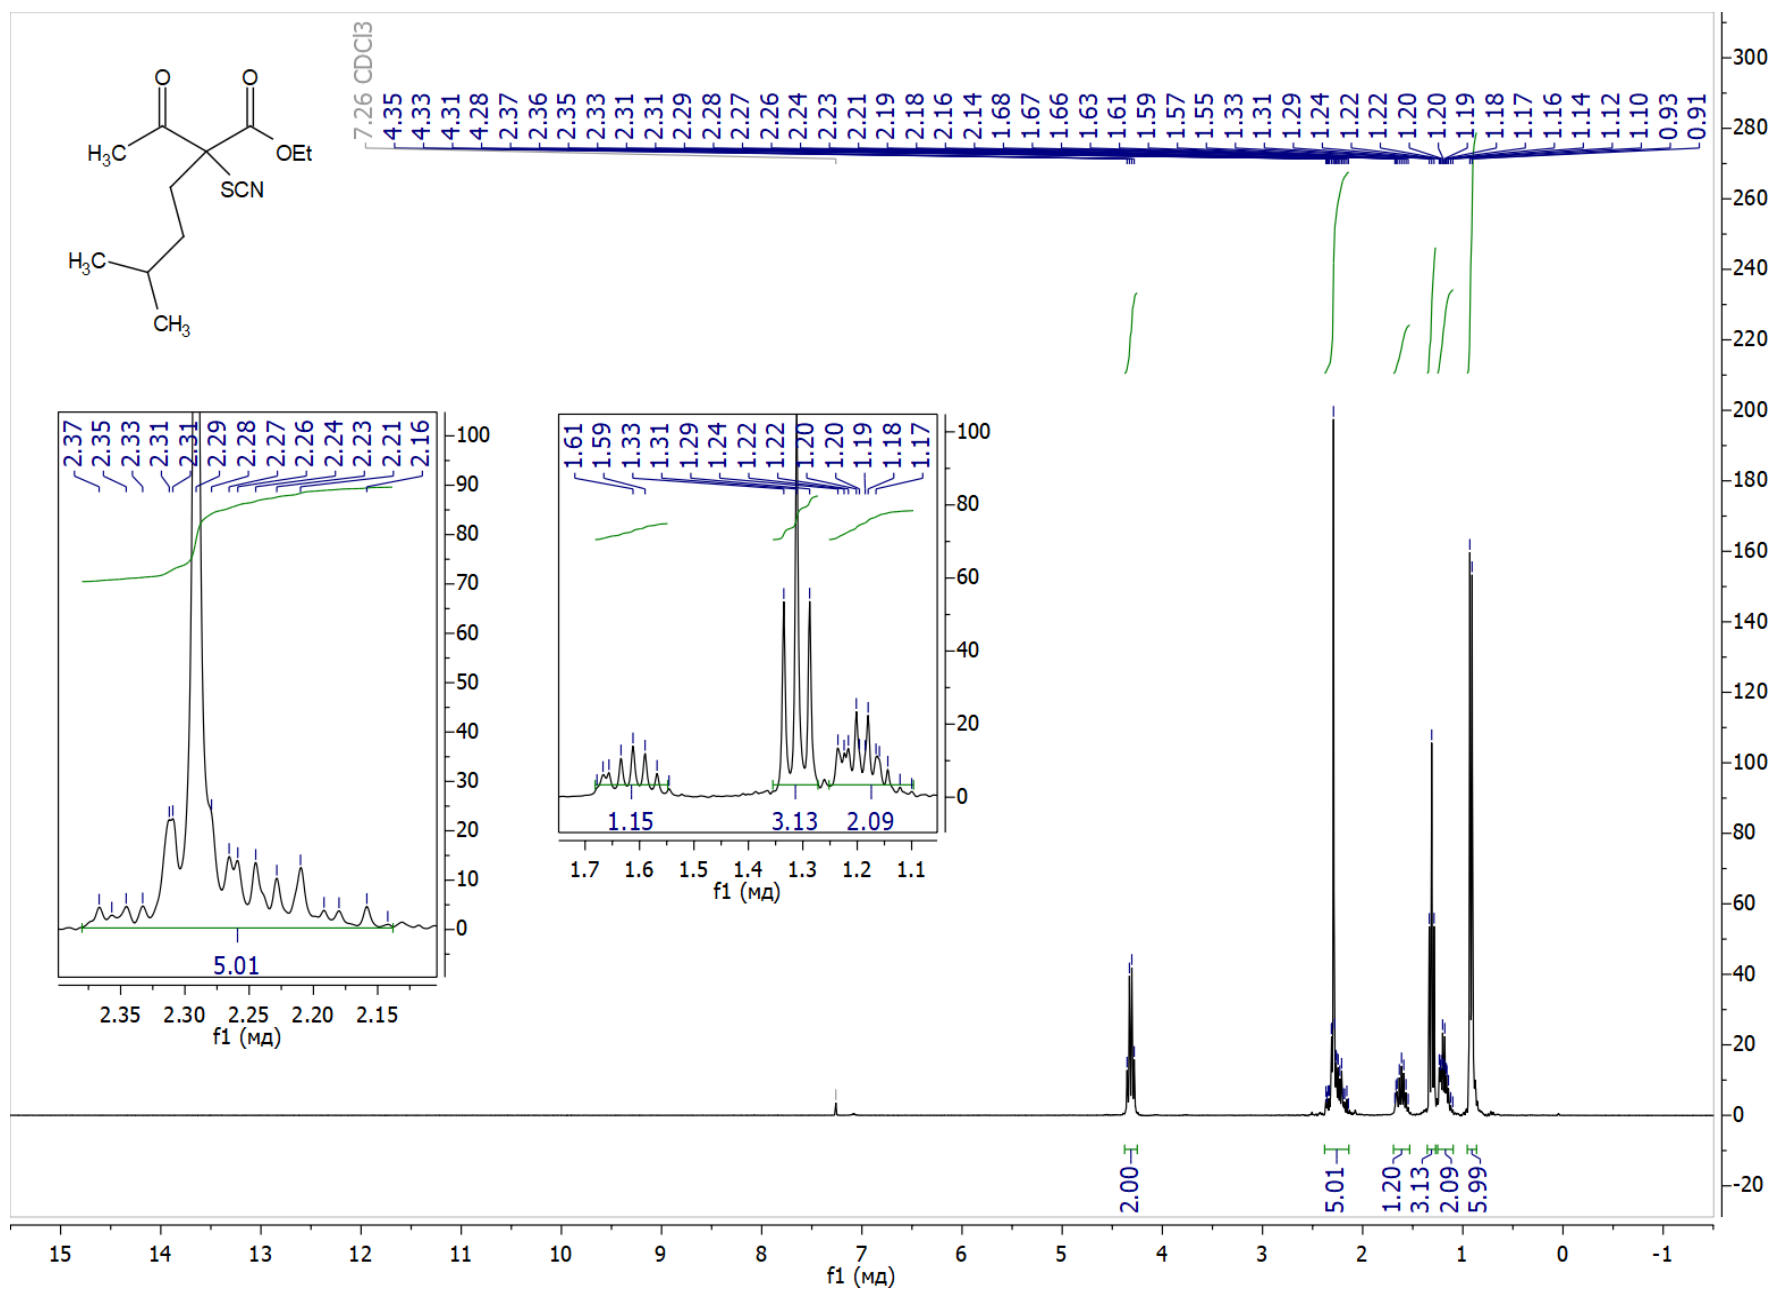

<sup>13</sup>C NMR (75.48 MHz, CDCl<sub>3</sub>) spectrum of ethyl 2-acetyl-5-methyl-2-thiocyanatohexanoate, **2p**

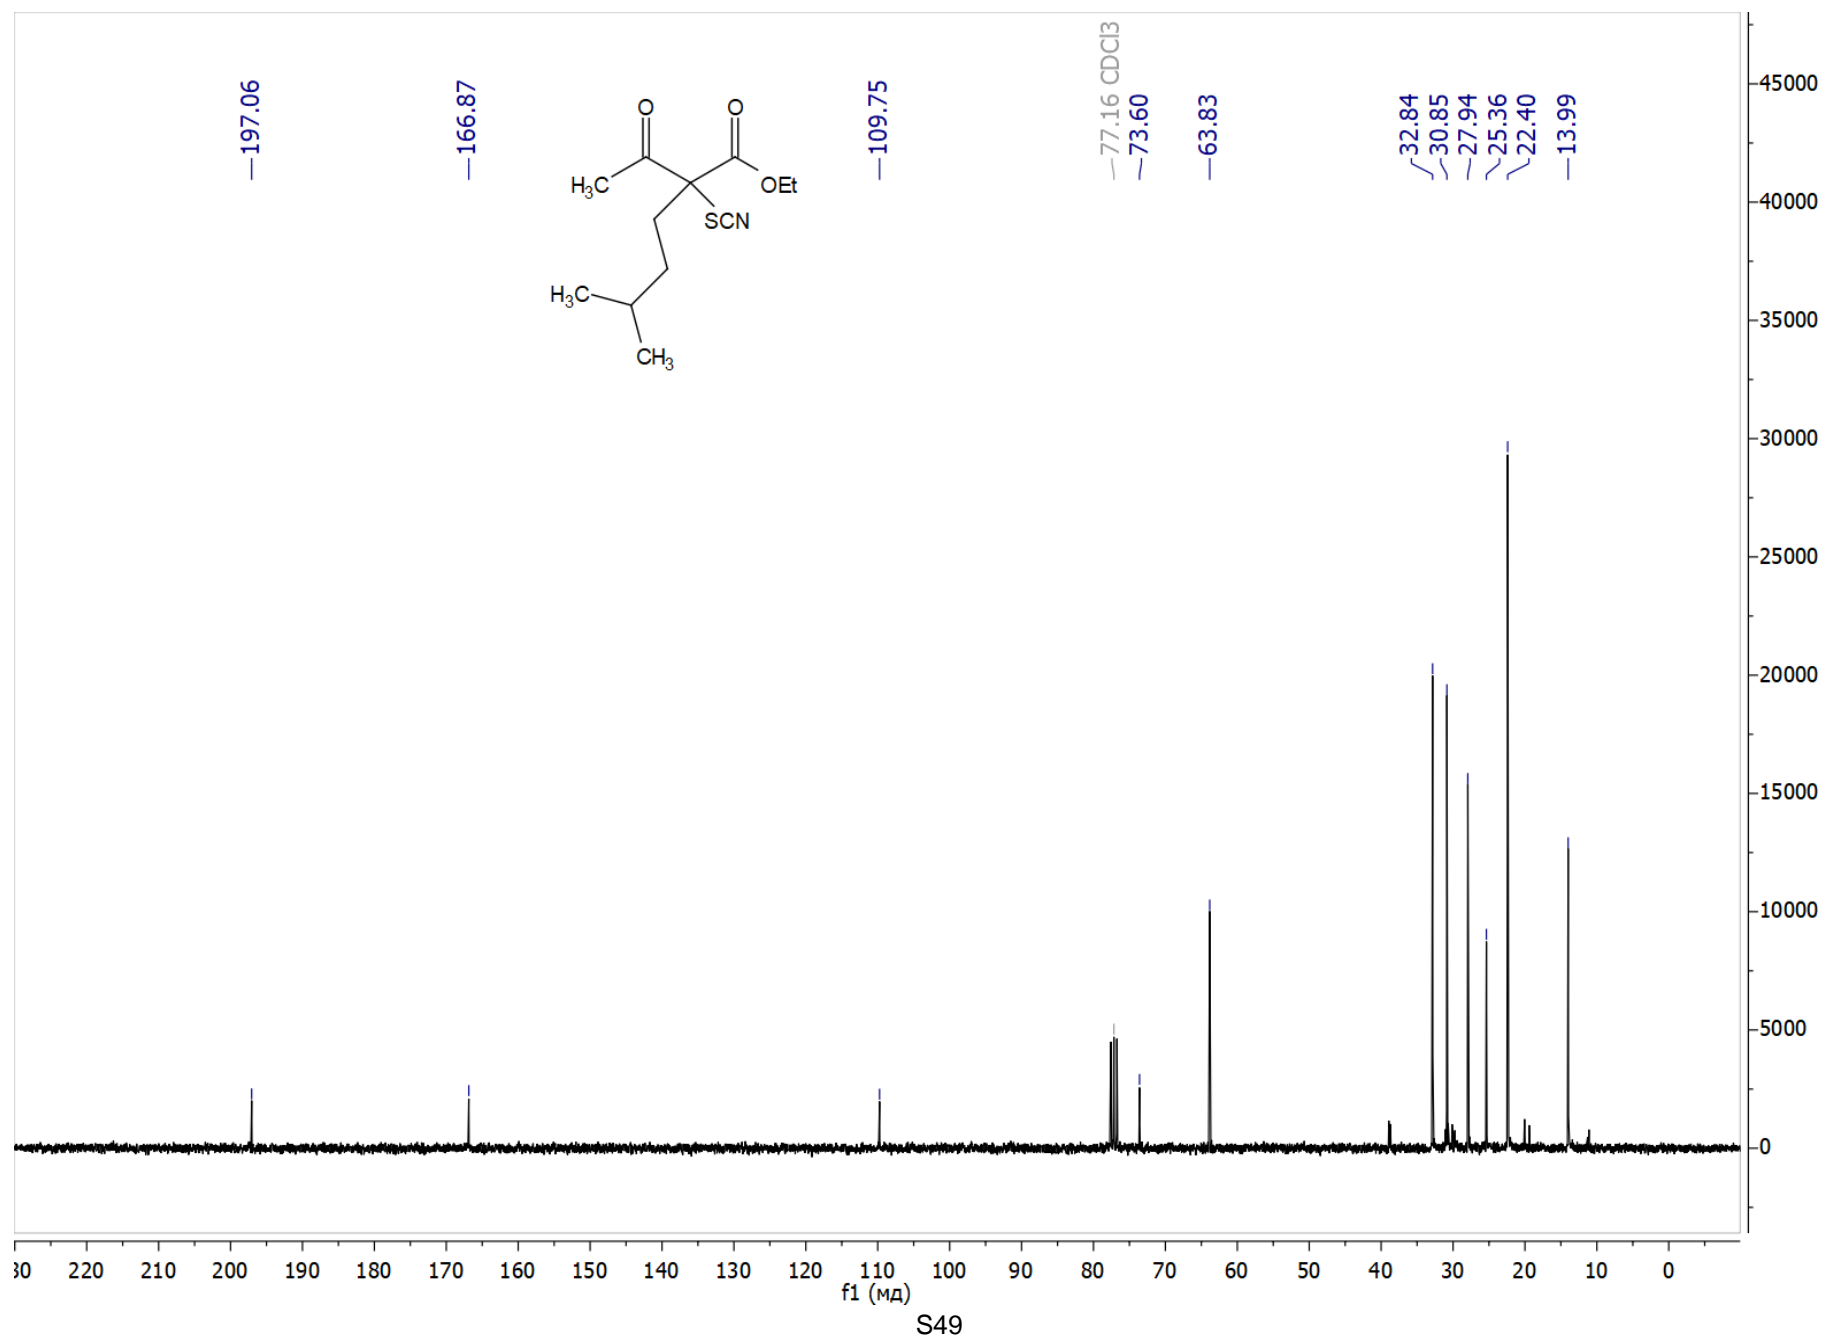

$^1\text{H}$  NMR (300.13 MHz,  $\text{CDCl}_3$ ) spectrum of diethyl 2-acetyl-2-thiocyanatopentanedioate, **2q**

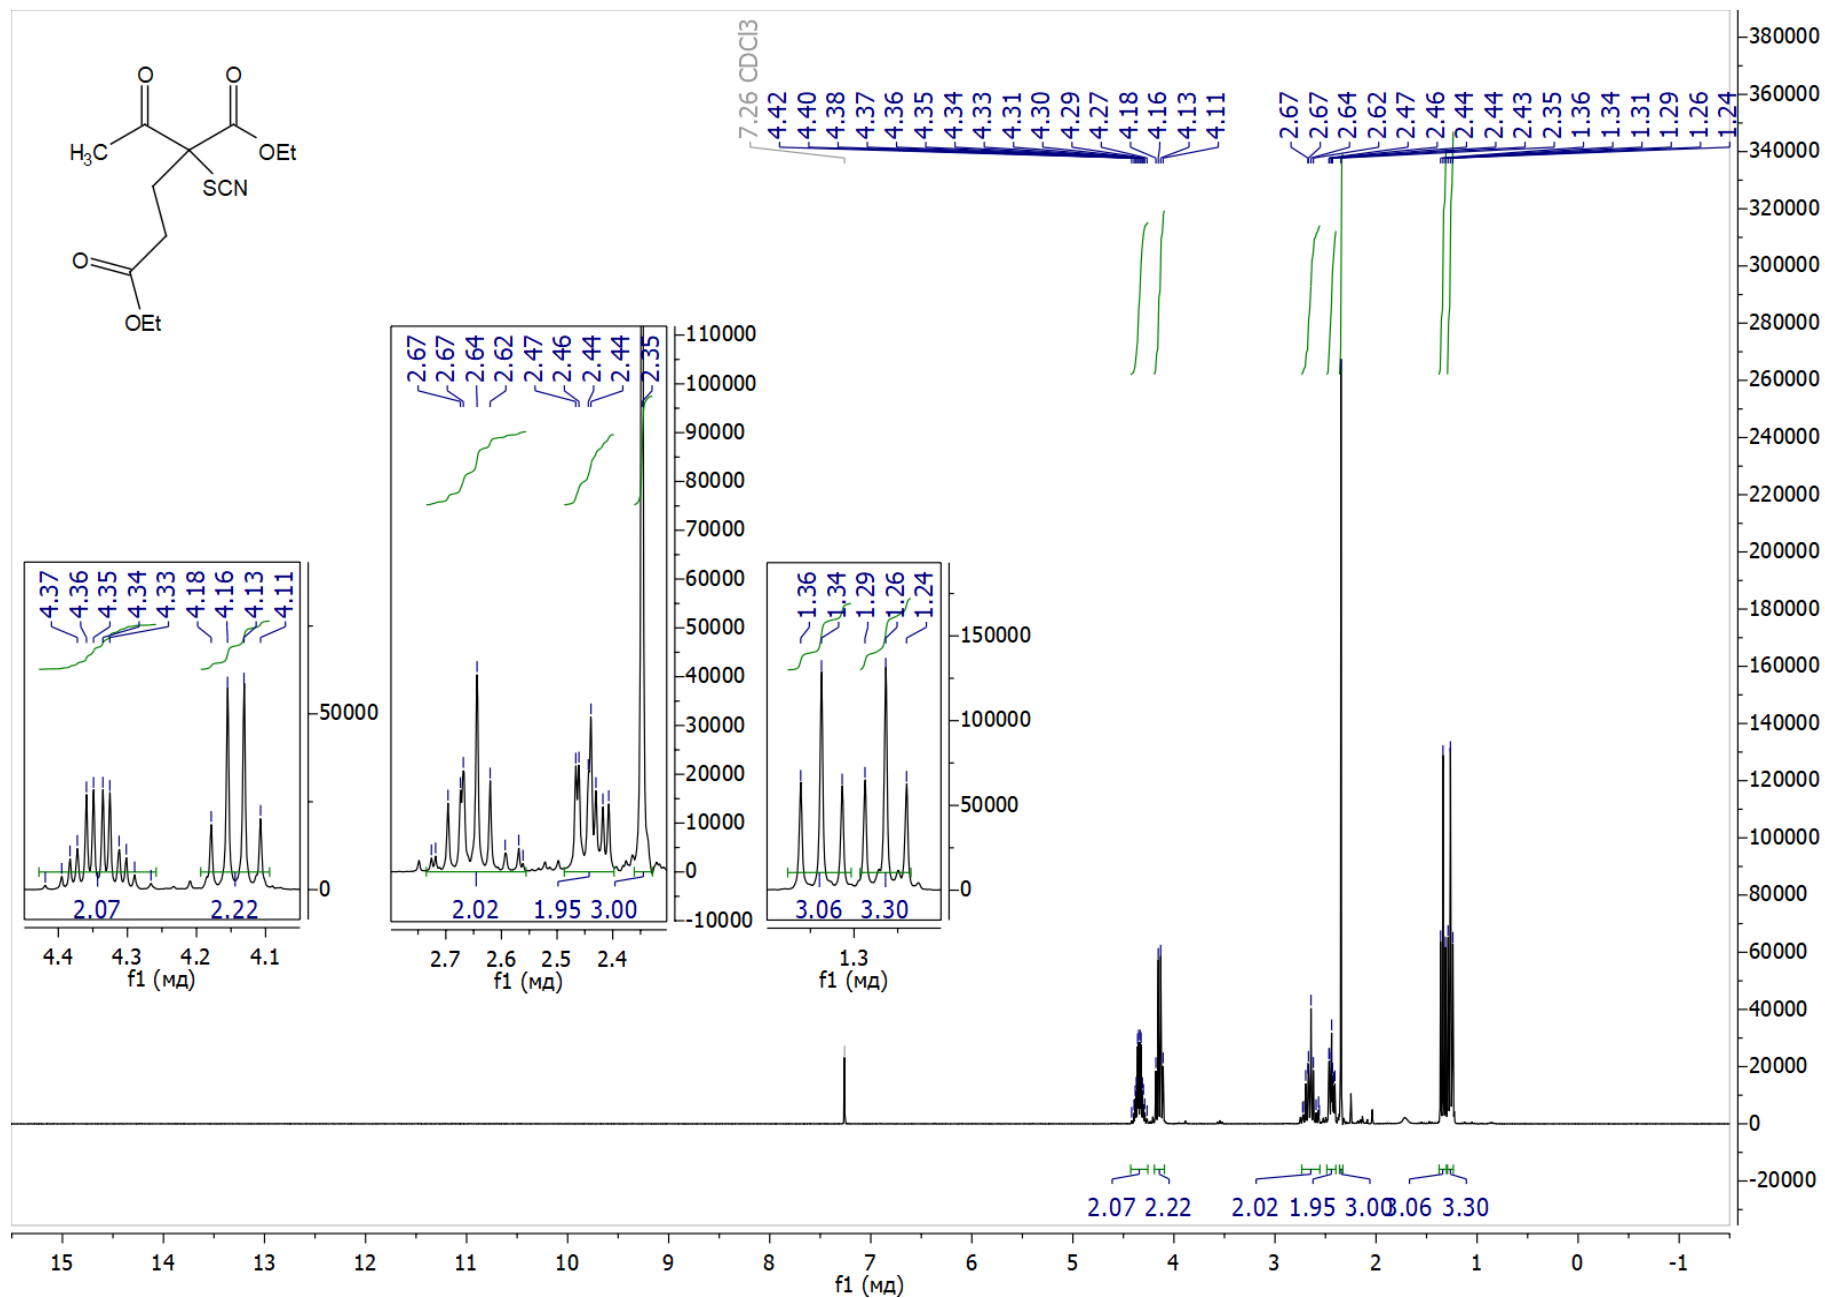

$^{13}\text{C}$  NMR (75.48 MHz,  $\text{CDCl}_3$ ) spectrum of diethyl 2-acetyl-2-thiocyanatopentanedioate, **2q**

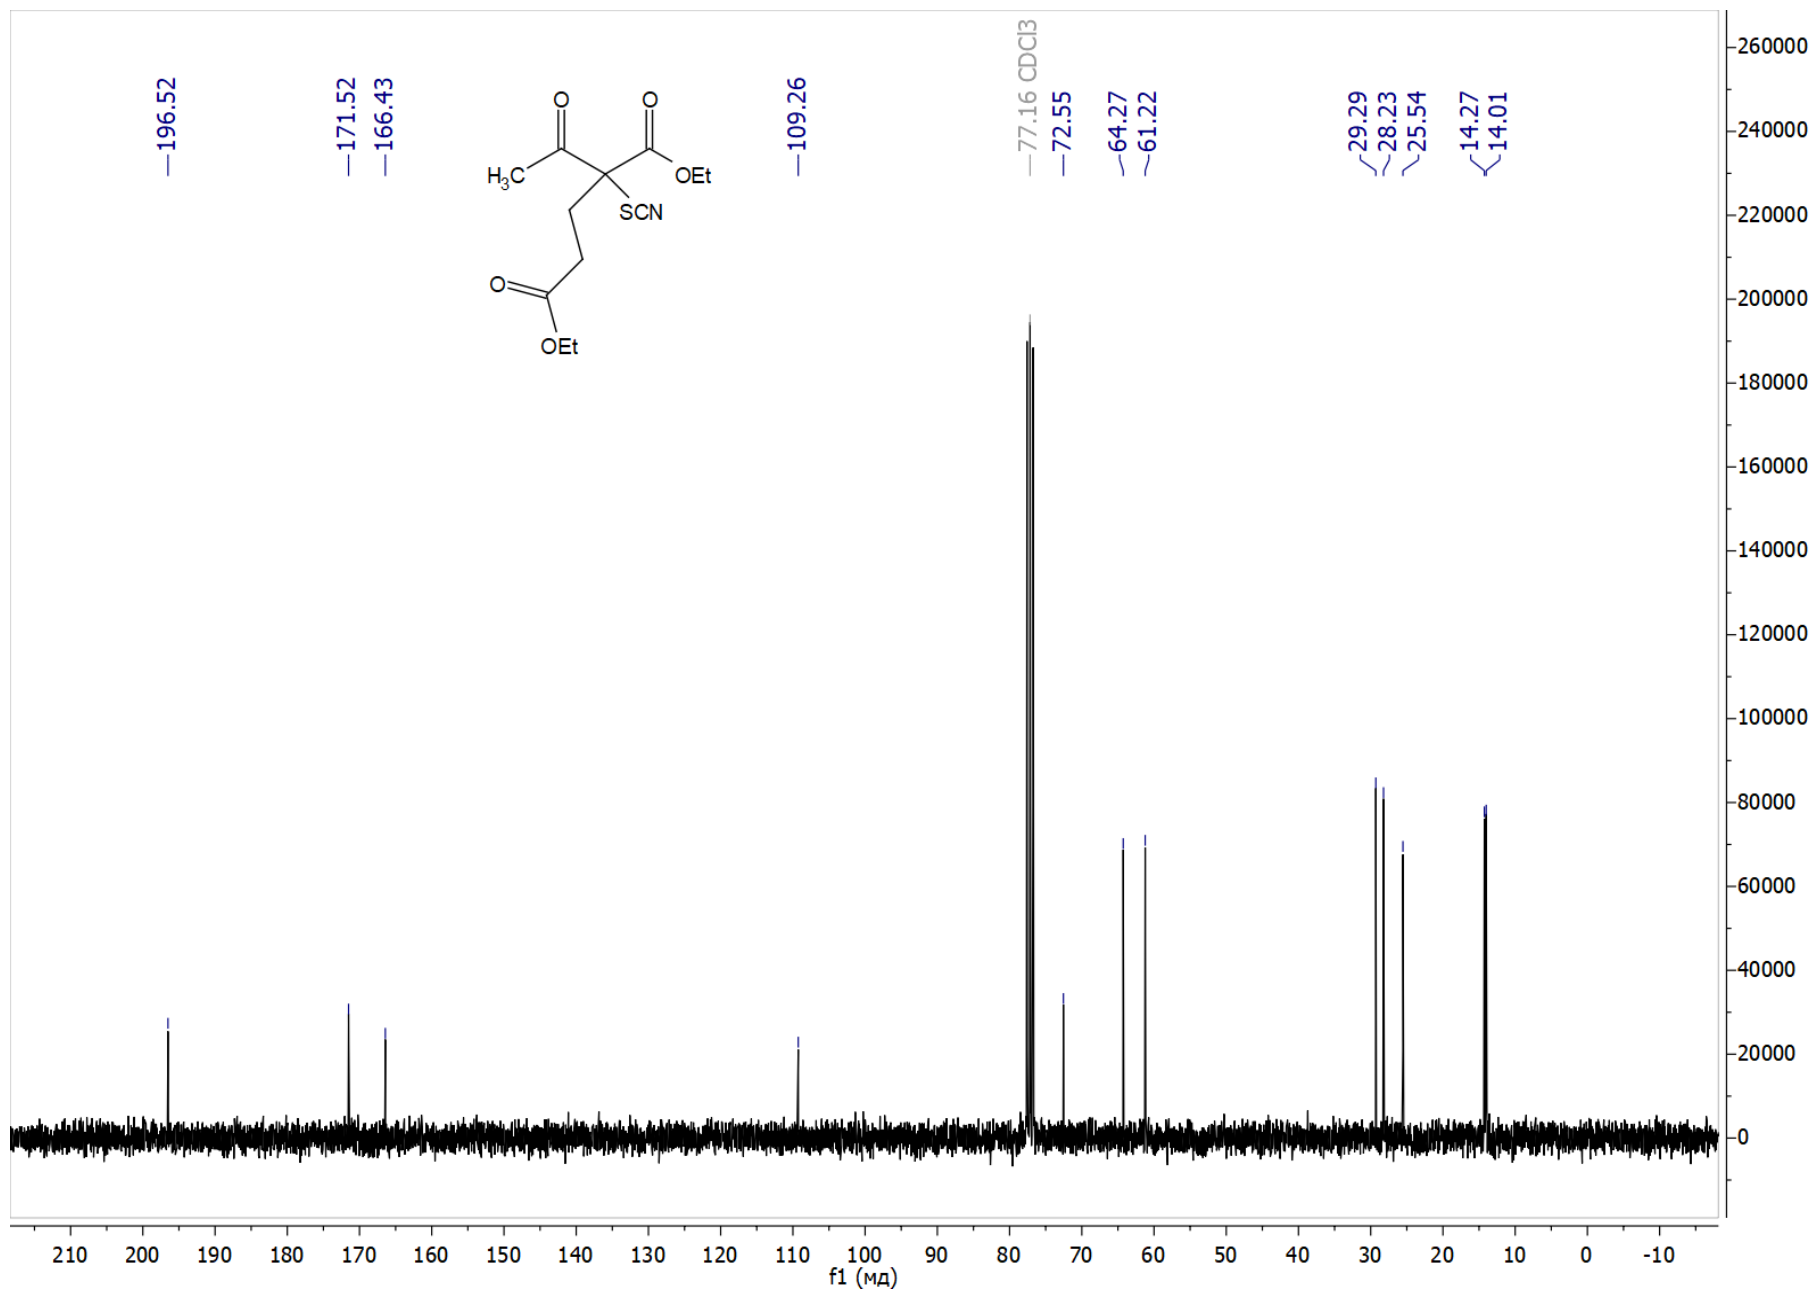

$^1\text{H}$  NMR (300.13 MHz,  $\text{CDCl}_3$ ) spectrum of ethyl 2-oxo-1-thiocyanatocyclohexane-1-carboxylate, **2r**

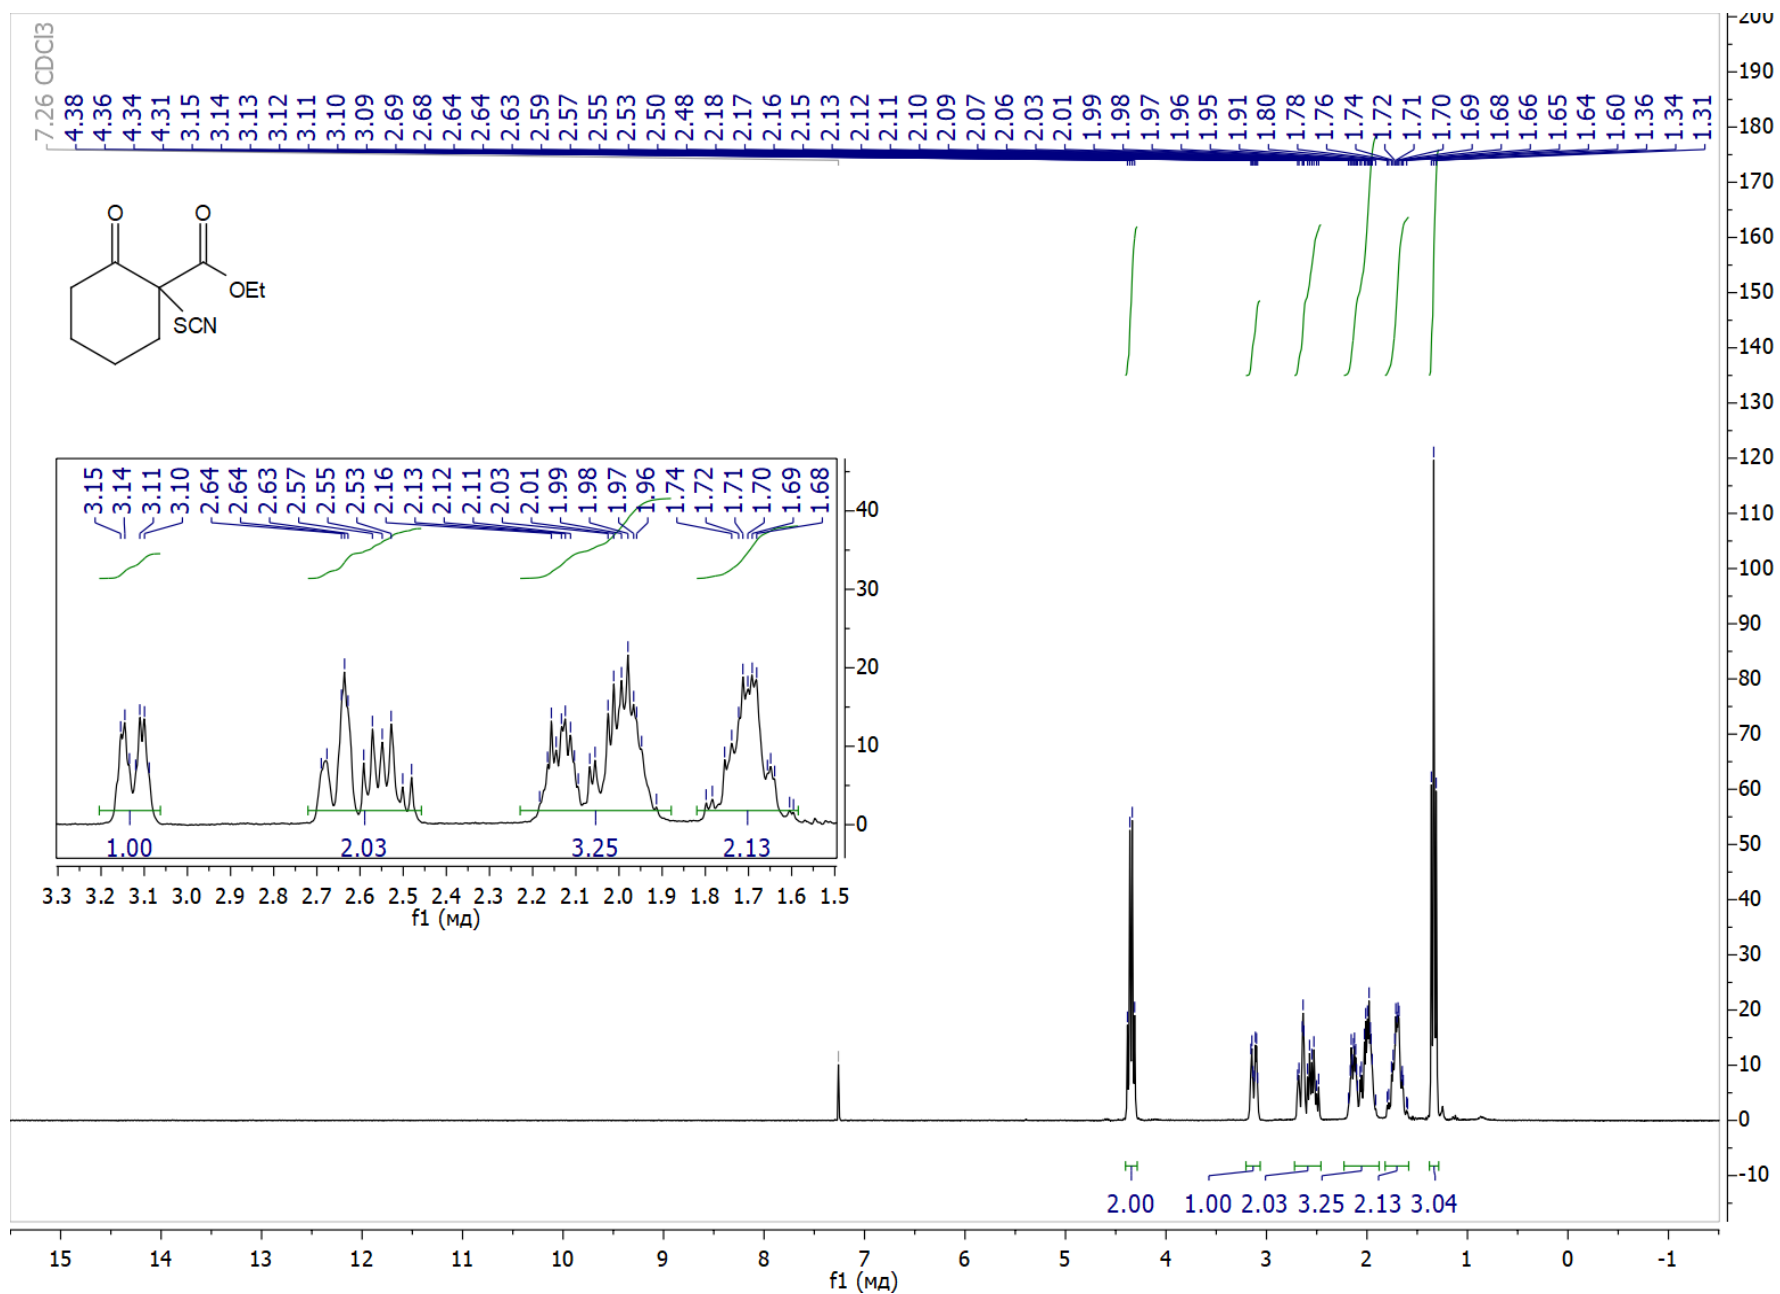

$^{13}\text{C}$  NMR (75.48 MHz,  $\text{CDCl}_3$ ) spectrum of ethyl 2-oxo-1-thiocyanatocyclohexane-1-carboxylate, **2r**

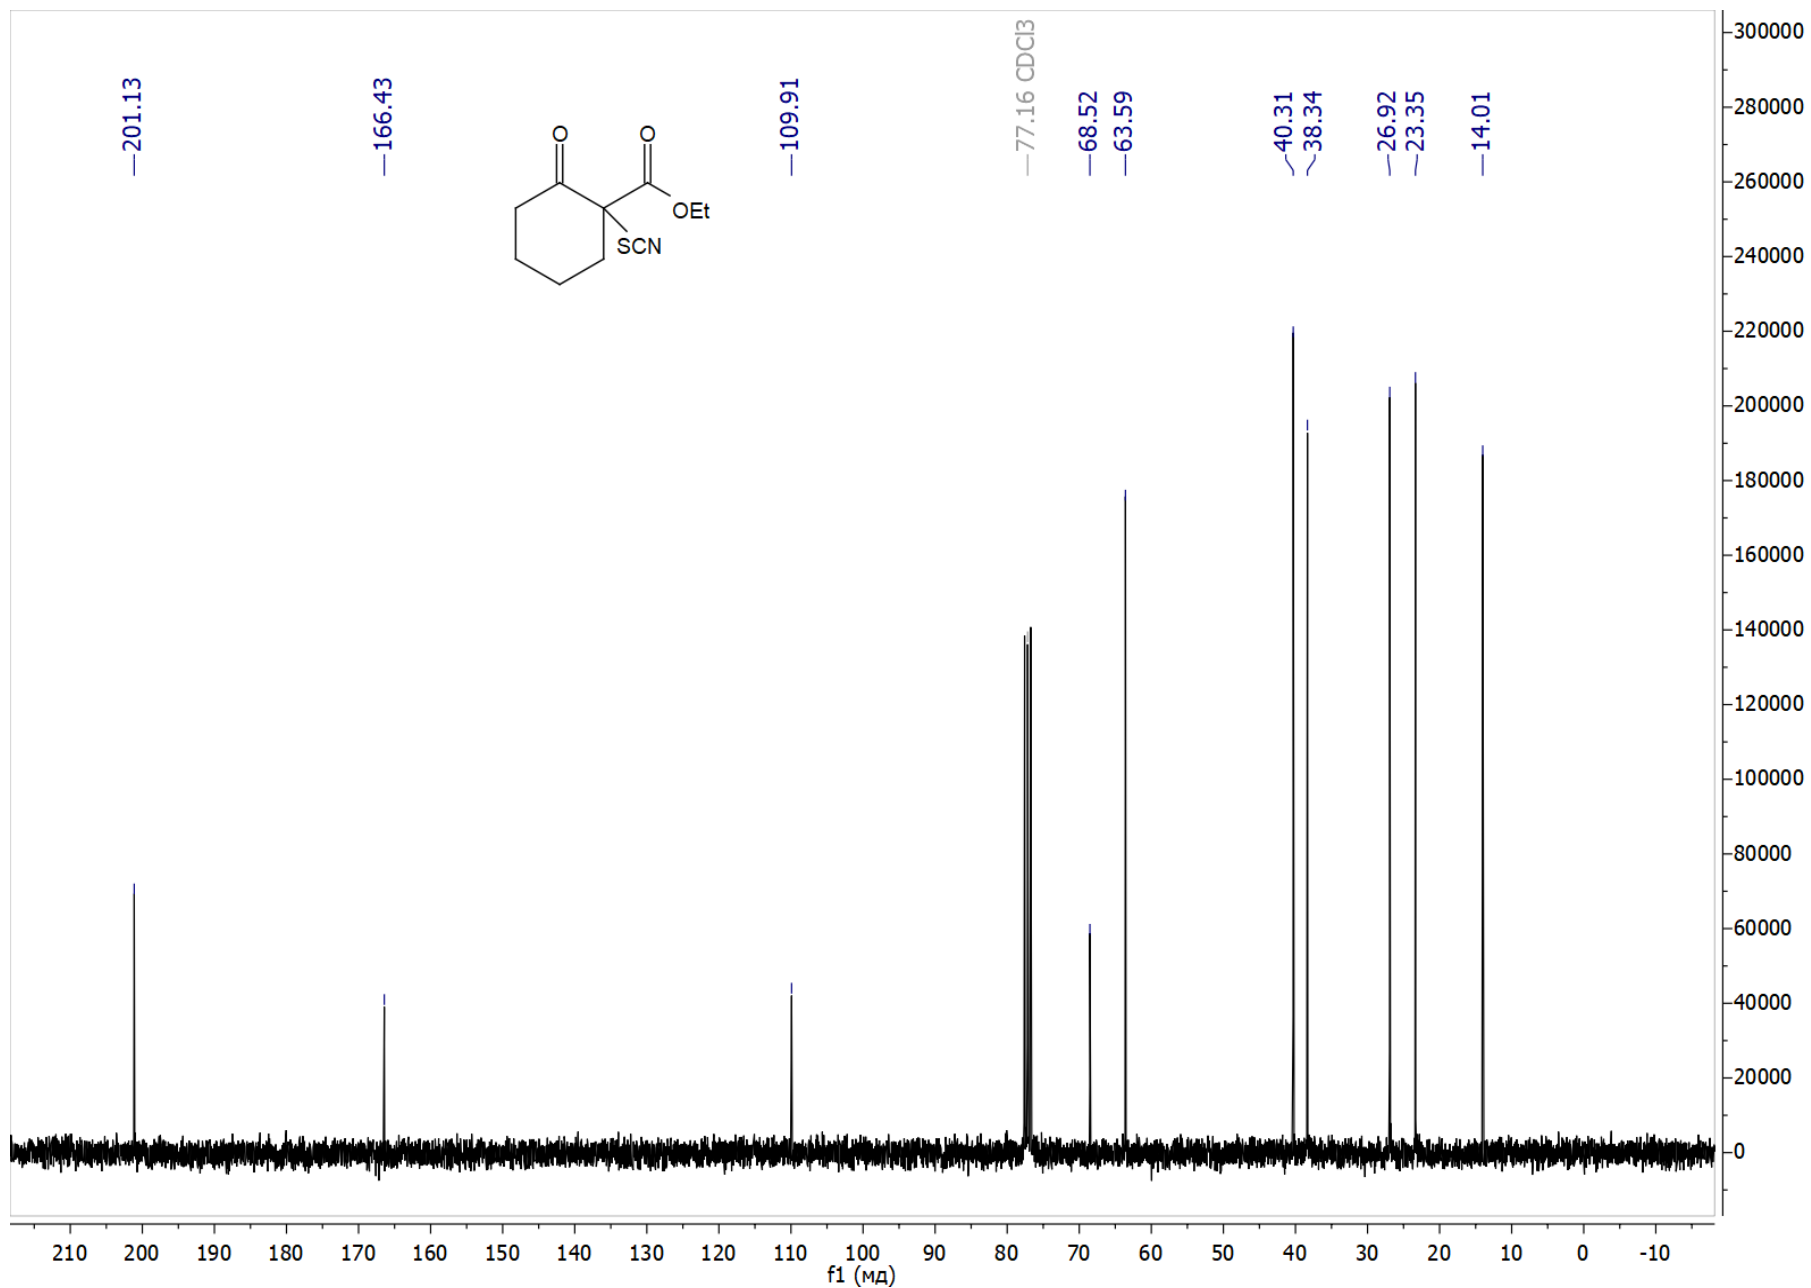

<sup>1</sup>H NMR (300.13 MHz, CDCl<sub>3</sub>) spectrum of ethyl 2-cyano-3-phenyl-2-thiocyanatopropanoate, **2s**

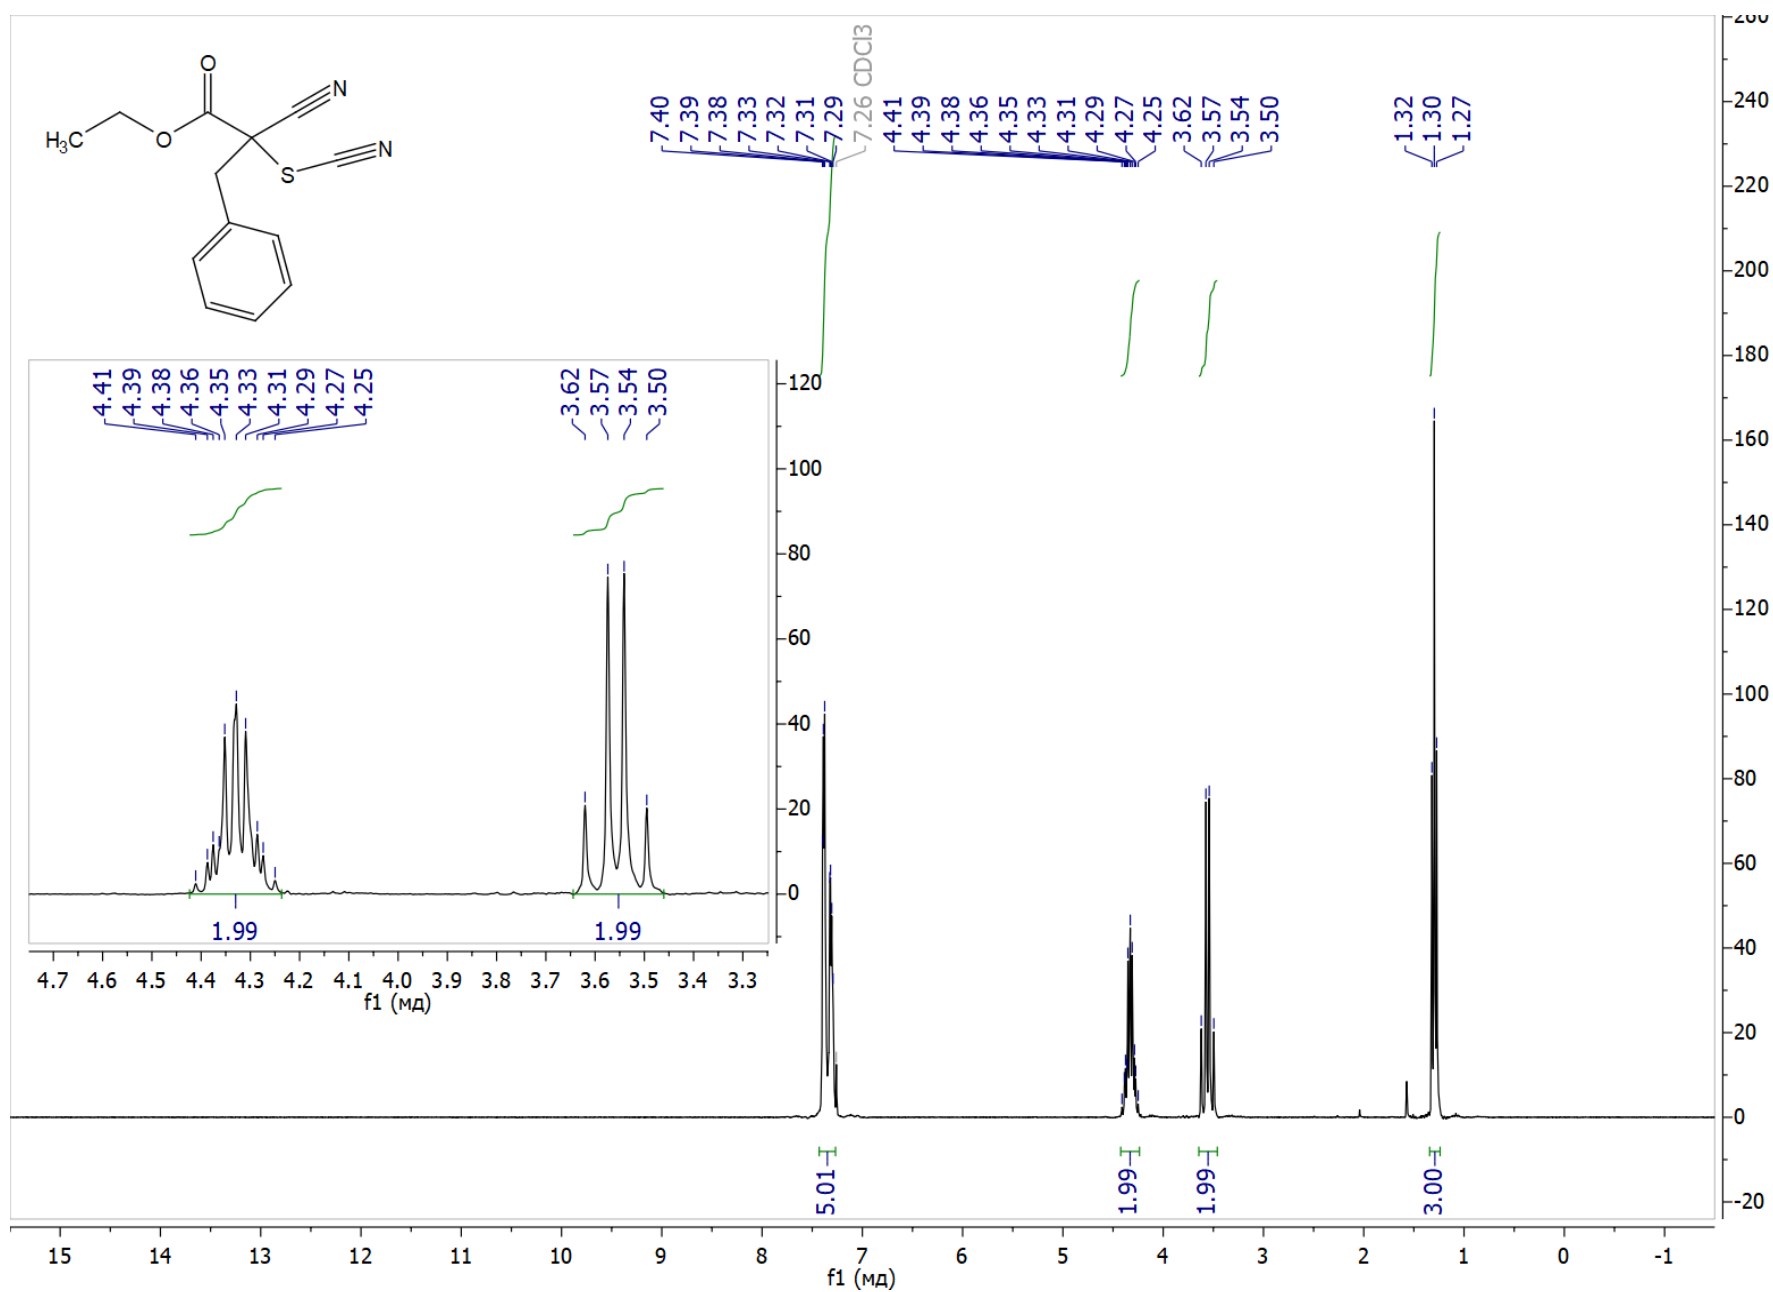

<sup>13</sup>C NMR (75.48 MHz, CDCl<sub>3</sub>) spectrum of ethyl 2-cyano-3-phenyl-2-thiocyanatopropanoate, **2s**

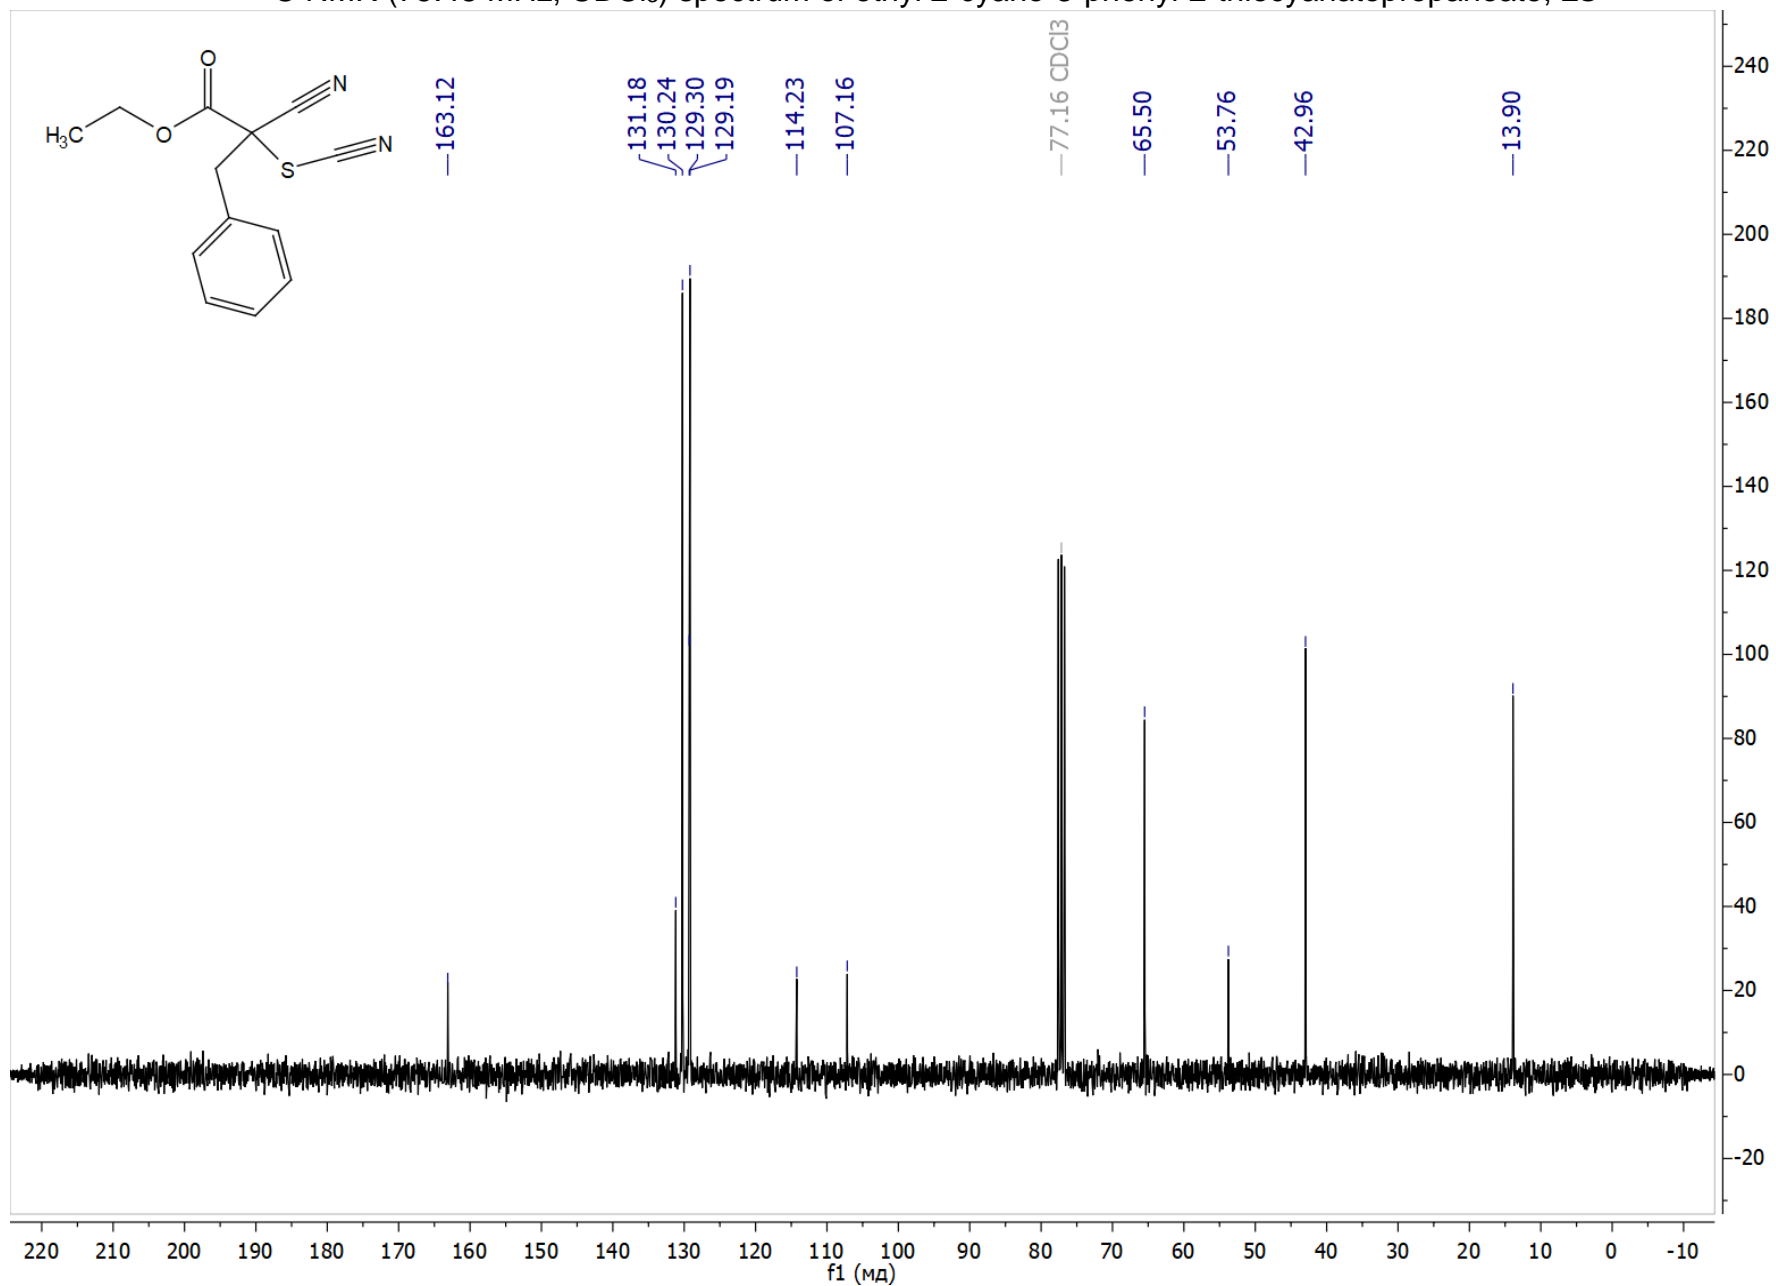

## HRMS spectra of synthesized thiocyanates

HRMS spectrum of 3-(4-methylbenzyl)-3-thiocyanatopentane-2,4-dione, **2b**

### Display Report

#### Analysis Info

Analysis Name D:\Data\Kolotyrkina\2022\Kirillov\1004025.d  
Method tune\_50-1600\_pos\_15\_12.m  
Sample Name /TERN Pil469  
Comment C14H15NO2S mH 262.0896 clb added CH3CN

Acquisition Date 04.10.2022 19:24:38

Operator BDAL@DE

Instrument / Ser# micrOTOF 10248

#### Acquisition Parameter

|             |            |                      |          |                  |           |
|-------------|------------|----------------------|----------|------------------|-----------|
| Source Type | ESI        | Ion Polarity         | Positive | Set Nebulizer    | 0.4 Bar   |
| Focus       | Not active |                      |          | Set Dry Heater   | 180 °C    |
| Scan Begin  | 50 m/z     | Set Capillary        | 4500 V   | Set Dry Gas      | 4.0 l/min |
| Scan End    | 1600 m/z   | Set End Plate Offset | -500 V   | Set Divert Valve | Waste     |

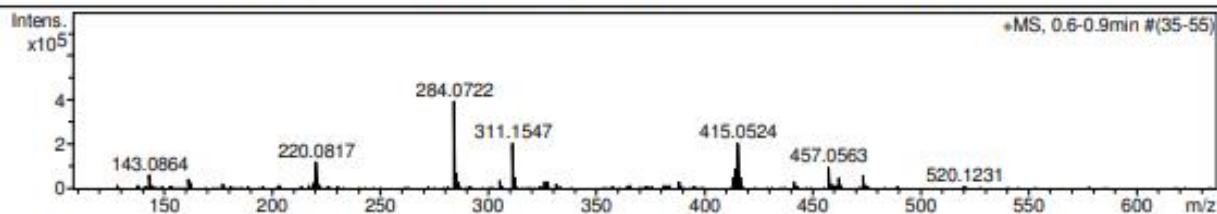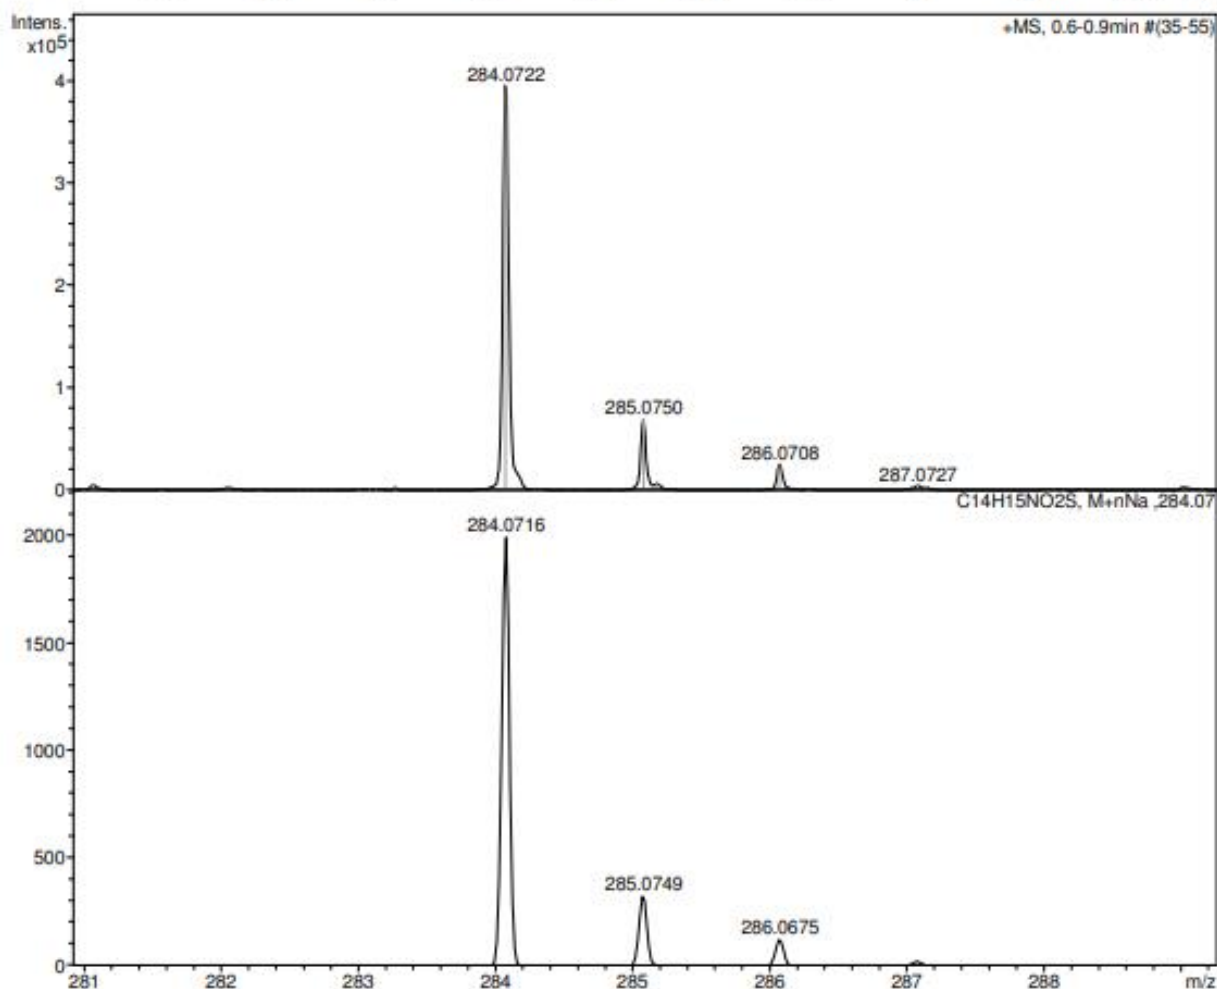

# HRMS spectrum of 3-butyl-3-thiocyanatopentane-2,4-dione, **2d**

## Display Report

### Analysis Info

Analysis Name D:\Data\Kolotyrkina\2022\Kirillov\1004021.d  
 Method tune\_low.m  
 Sample Name /TERN P1462  
 Comment C10H15NO2S mH 214.0896 clb added CH3CN

Acquisition Date 04.10.2022 18:44:05

Operator BDAL@DE  
 Instrument / Ser# micrOTOF 10248

### Acquisition Parameter

|             |            |                      |          |                  |           |
|-------------|------------|----------------------|----------|------------------|-----------|
| Source Type | ESI        | Ion Polarity         | Positive | Set Nebulizer    | 0.4 Bar   |
| Focus       | Not active |                      |          | Set Dry Heater   | 180 °C    |
| Scan Begin  | 50 m/z     | Set Capillary        | 4500 V   | Set Dry Gas      | 4.0 l/min |
| Scan End    | 2500 m/z   | Set End Plate Offset | -500 V   | Set Divert Valve | Waste     |

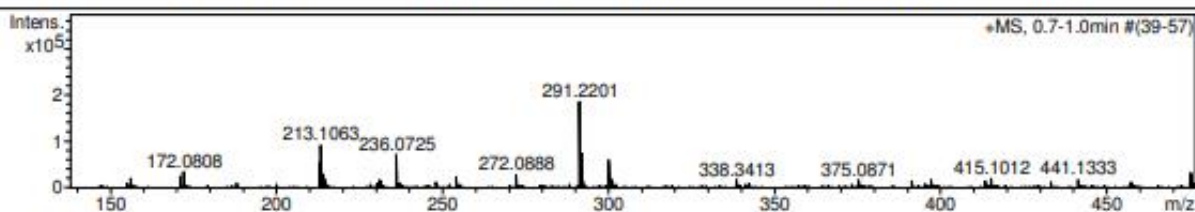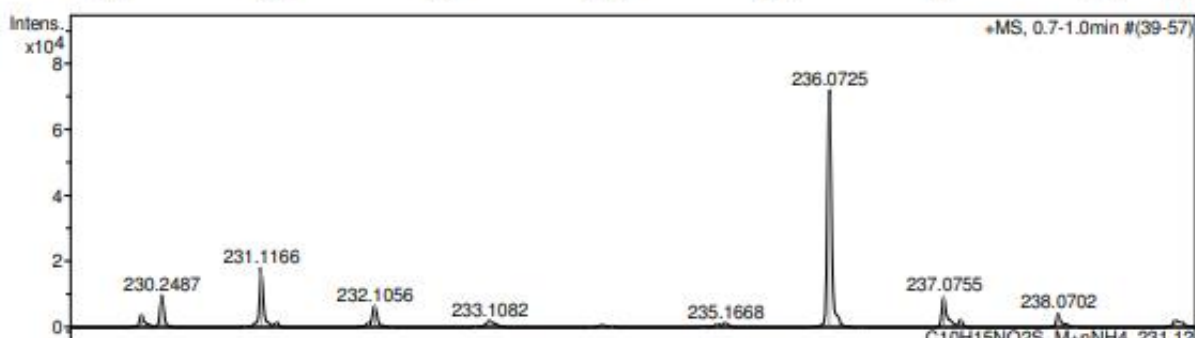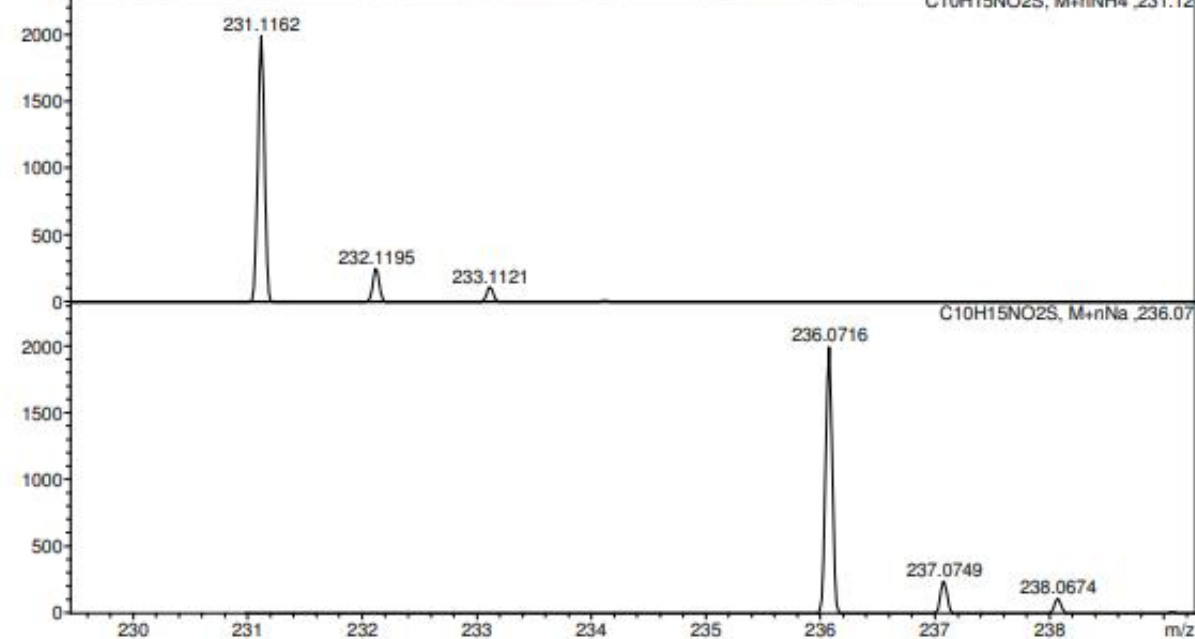

## Display Report

## Analysis Info

Analysis Name D:\Data\Kolotyrykina\2022\Kirillov\1004022.d  
Method tune\_low.m  
Sample Name /TERN Pil475  
Comment C14H23NO2S mH 270.1522 clb added CH3CN

Acquisition Date 04.10.2022 18:50:47

Operator BDAL@DE

Instrument / Ser# micrOTOF 10248

## Acquisition Parameter

|             |            |                      |          |                  |           |
|-------------|------------|----------------------|----------|------------------|-----------|
| Source Type | ESI        | Ion Polarity         | Positive | Set Nebulizer    | 0.4 Bar   |
| Focus       | Not active |                      |          | Set Dry Heater   | 180 °C    |
| Scan Begin  | 50 m/z     | Set Capillary        | 4500 V   | Set Dry Gas      | 4.0 l/min |
| Scan End    | 2500 m/z   | Set End Plate Offset | -500 V   | Set Divert Valve | Waste     |

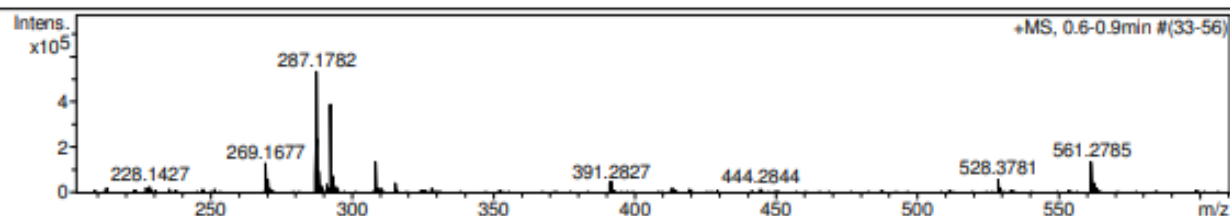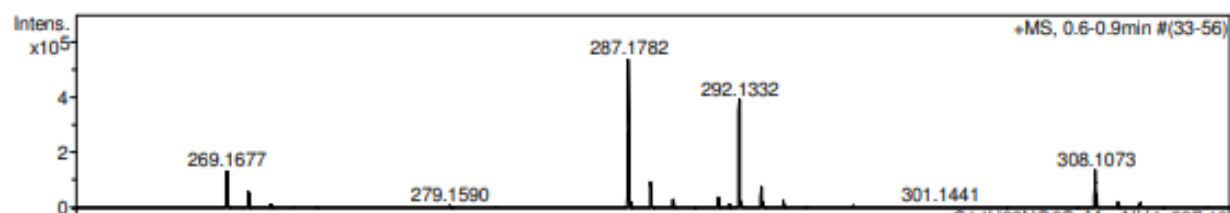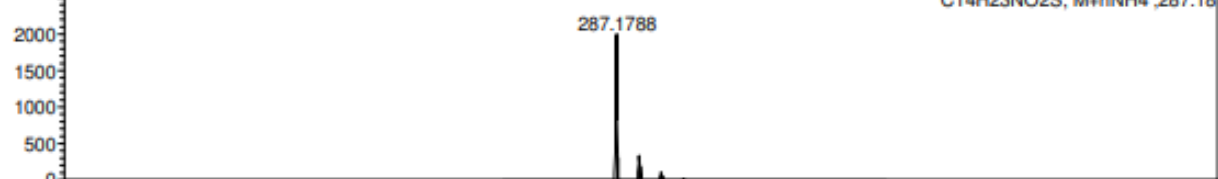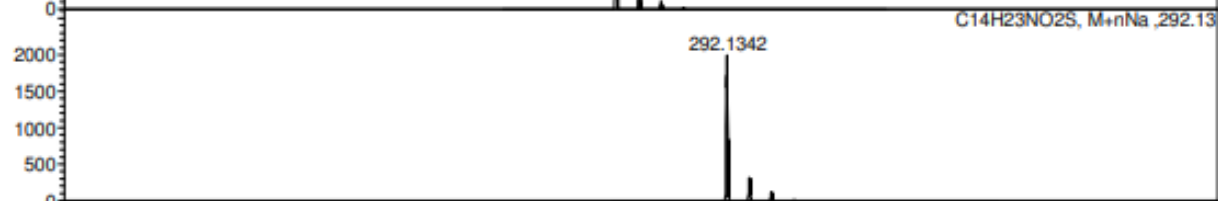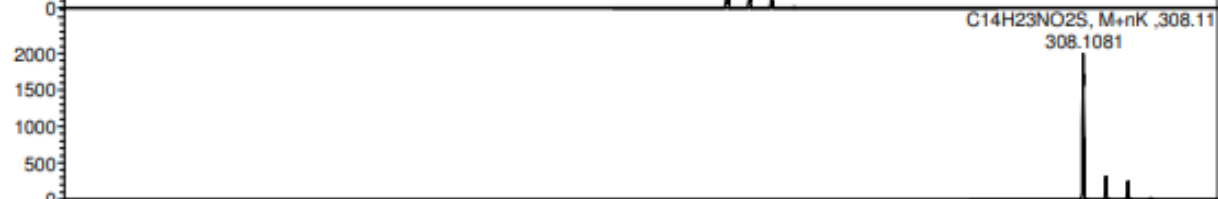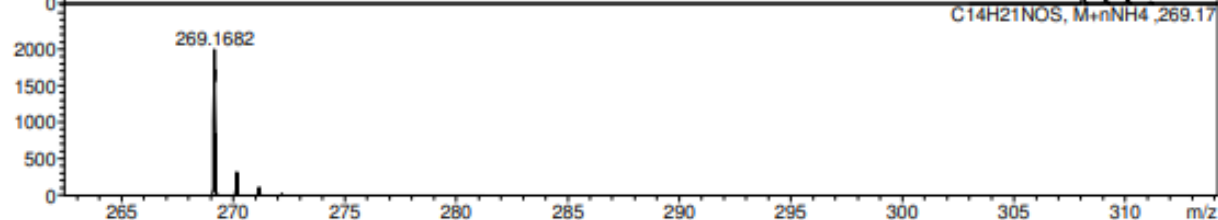

# HRMS spectrum of 3-isopentyl-3-thiocyanatopentane-2,4-dione, **2g**

## Display Report

### Analysis Info

Analysis Name D:\Data\Kolotyrkina\2022\Kirillov\1004024.d  
 Method tune\_50-1600\_pos\_15\_12.m  
 Sample Name /TERN Pil413  
 Comment C11H17NO2S mH 228.1052 clb added CH3CN

Acquisition Date 04.10.2022 19:10:32

Operator BDAL@DE

Instrument / Ser# micrOTOF 10248

### Acquisition Parameter

|             |            |                      |          |                  |           |
|-------------|------------|----------------------|----------|------------------|-----------|
| Source Type | ESI        | Ion Polarity         | Positive | Set Nebulizer    | 0.4 Bar   |
| Focus       | Not active |                      |          | Set Dry Heater   | 180 °C    |
| Scan Begin  | 50 m/z     | Set Capillary        | 4500 V   | Set Dry Gas      | 4.0 l/min |
| Scan End    | 1600 m/z   | Set End Plate Offset | -500 V   | Set Divert Valve | Waste     |

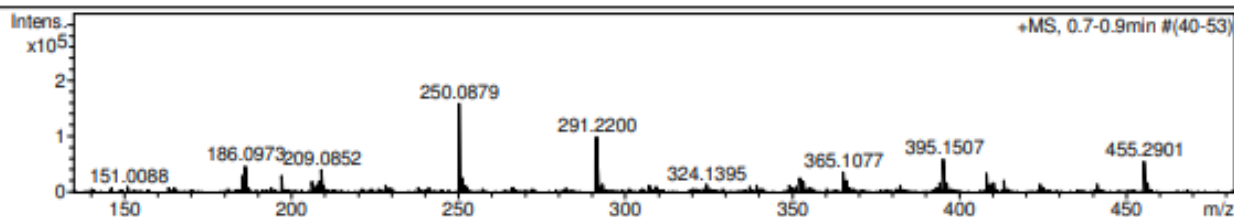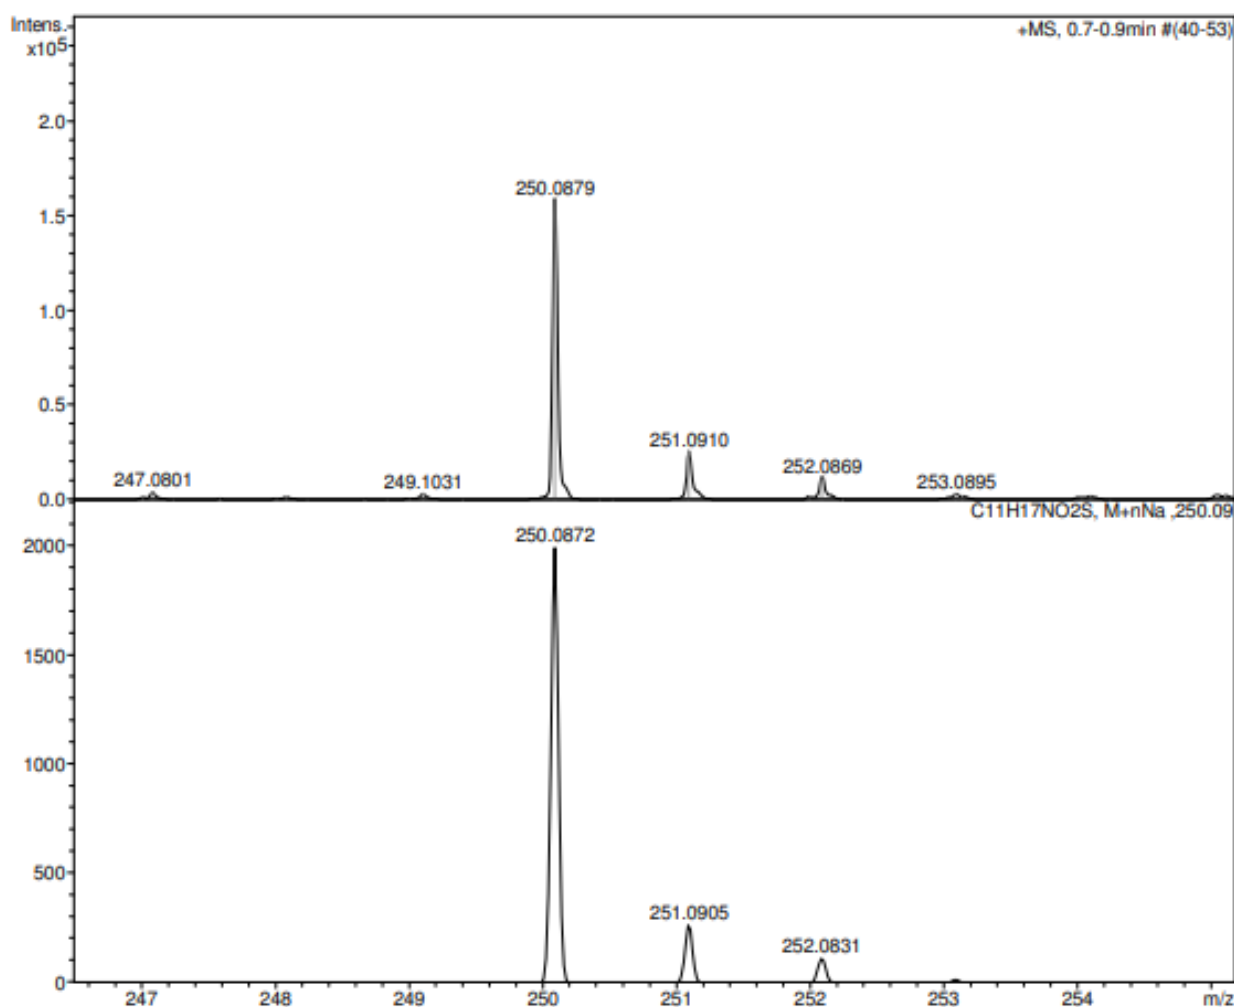

# HRMS spectrum of 3-ethyl-6-methyl-3-thiocyanatoheptane-2,4-dione, **2h**

## Display Report

### Analysis Info

Analysis Name D:\Data\Kolotyrkina\2022\Kirillov\1006007.d  
 Method tune\_low.m  
 Sample Name /TERN Pil427  
 Comment C11H17NO2S mH228.1052 clb added CH3CN

Acquisition Date 06.10.2022 10:40:22  
 Operator BDAL@DE  
 Instrument / Ser# micrOTOF 10248

### Acquisition Parameter

|             |            |                      |          |                  |           |
|-------------|------------|----------------------|----------|------------------|-----------|
| Source Type | ESI        | Ion Polarity         | Positive | Set Nebulizer    | 0.4 Bar   |
| Focus       | Not active |                      |          | Set Dry Heater   | 180 °C    |
| Scan Begin  | 50 m/z     | Set Capillary        | 4500 V   | Set Dry Gas      | 4.0 l/min |
| Scan End    | 2500 m/z   | Set End Plate Offset | -500 V   | Set Divert Valve | Waste     |

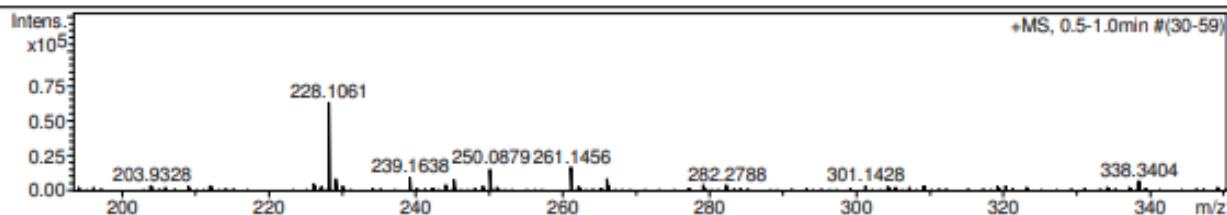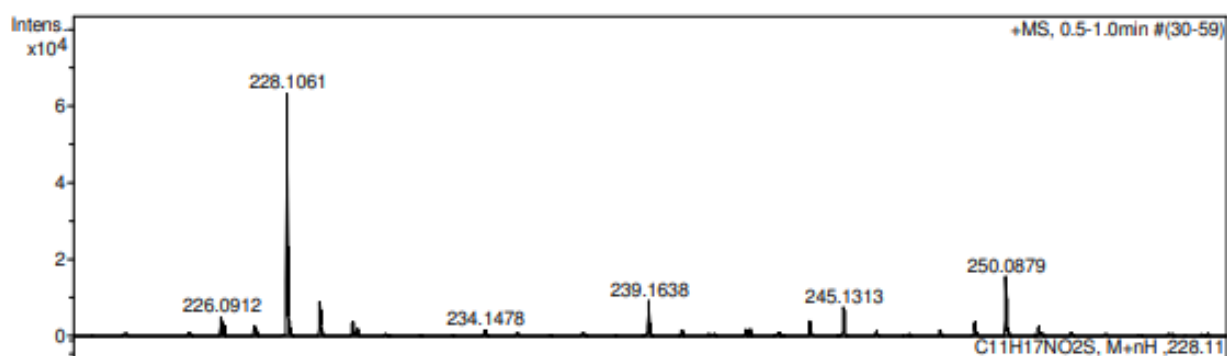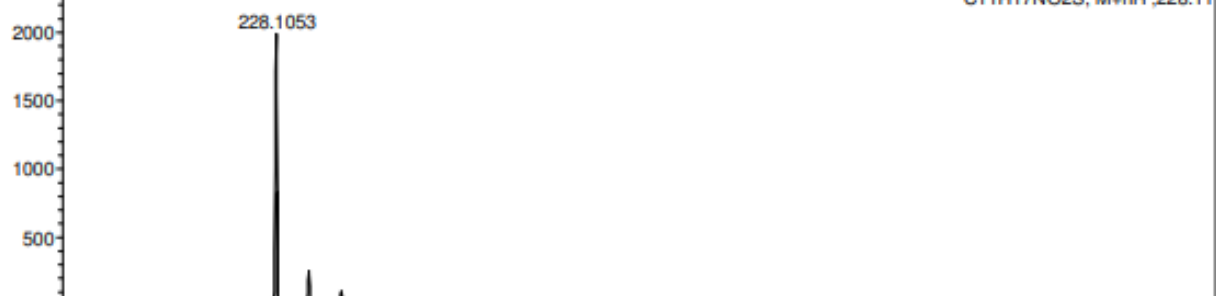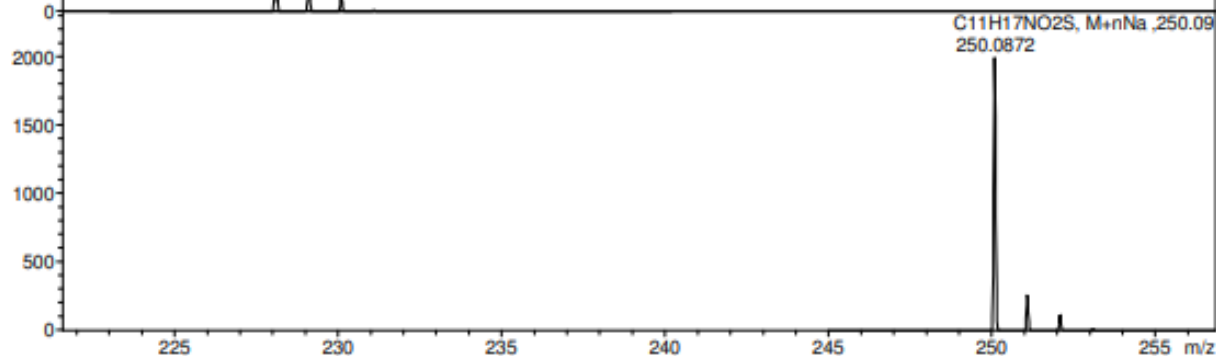

# HRMS spectrum of ethyl 2-benzyl-3-oxo-2-thiocyanatobutanoate, 2j

## Display Report

### Analysis Info

Analysis Name D:\Data\Kolotyrkina\2022\Kirillov\1006009.d  
 Method tune\_low.m  
 Sample Name /TERN Pil477  
 Comment C14H15NO3S mH278.0845 clb added CH3CN

Acquisition Date 06.10.2022 10:57:52

Operator BDAL@DE  
 Instrument / Ser# microTOF 10248

### Acquisition Parameter

|             |            |                      |          |                  |           |
|-------------|------------|----------------------|----------|------------------|-----------|
| Source Type | ESI        | Ion Polarity         | Positive | Set Nebulizer    | 0.4 Bar   |
| Focus       | Not active |                      |          | Set Dry Heater   | 180 °C    |
| Scan Begin  | 50 m/z     | Set Capillary        | 4500 V   | Set Dry Gas      | 4.0 l/min |
| Scan End    | 2500 m/z   | Set End Plate Offset | -500 V   | Set Divert Valve | Waste     |

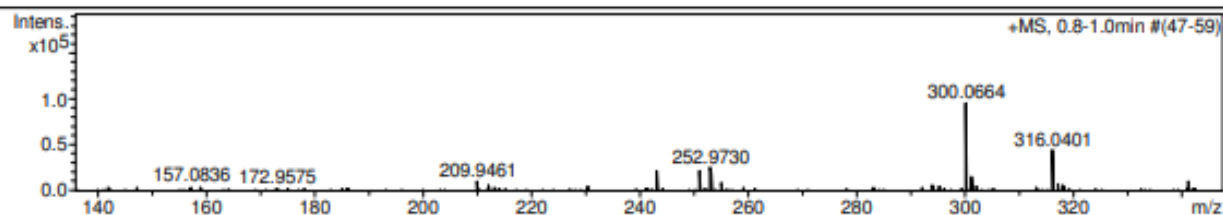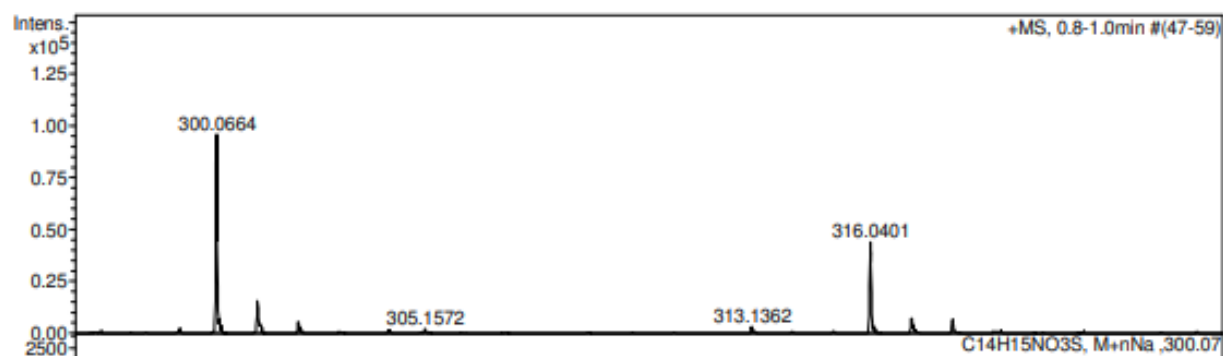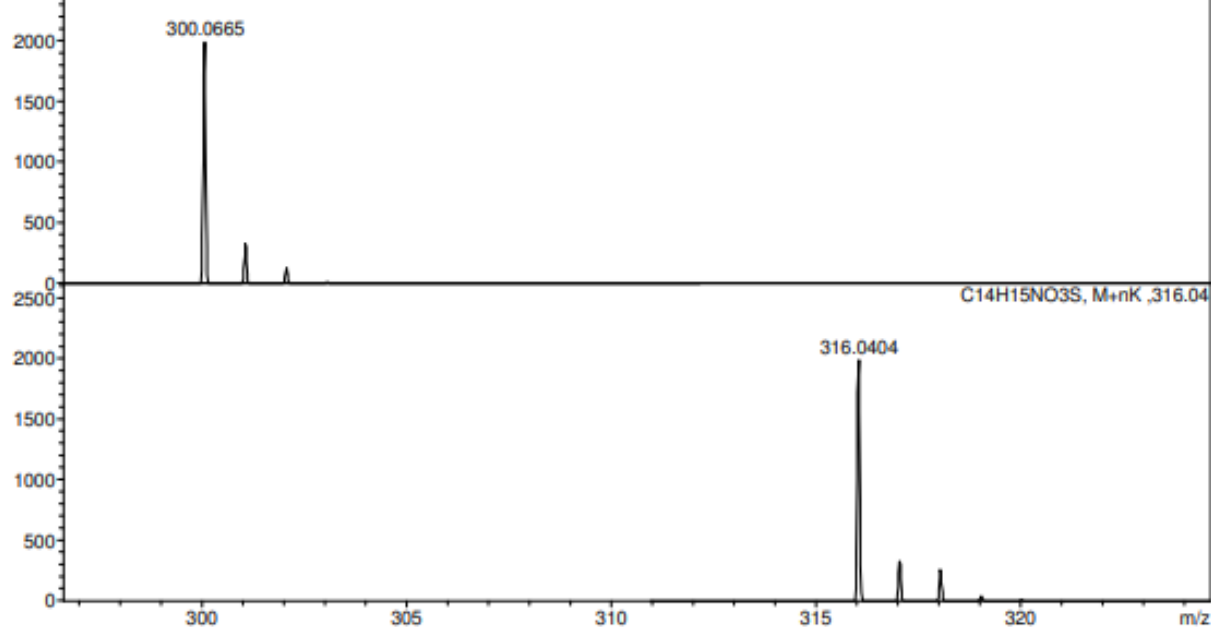

# HRMS spectrum of ethyl 2-(4-(*tert*-butyl)benzyl)-3-oxo-2-thiocyanatobutanoate, **2k**

## Display Report

### Analysis Info

Analysis Name D:\Data\Kolotyrkina\2022\Kirillov\1006006.d  
 Method tune\_low.m  
 Sample Name /TERN Pil410  
 Comment C18H23NO3S mH334.1471 clb added CH3CN

Acquisition Date 06.10.2022 10:36:02

Operator BDAL@DE

Instrument / Ser# microTOF 10248

### Acquisition Parameter

|             |            |                      |          |                  |           |
|-------------|------------|----------------------|----------|------------------|-----------|
| Source Type | ESI        | Ion Polarity         | Positive | Set Nebulizer    | 0.4 Bar   |
| Focus       | Not active |                      |          | Set Dry Heater   | 180 °C    |
| Scan Begin  | 50 m/z     | Set Capillary        | 4500 V   | Set Dry Gas      | 4.0 l/min |
| Scan End    | 2500 m/z   | Set End Plate Offset | -500 V   | Set Divert Valve | Waste     |

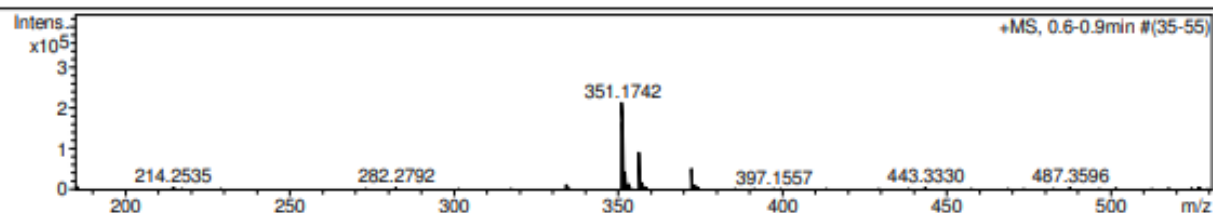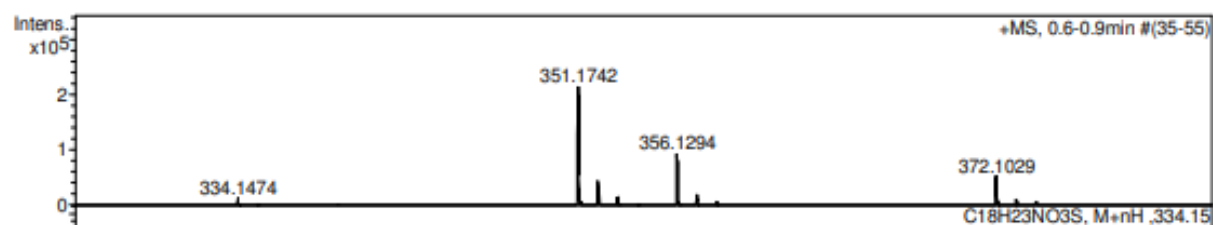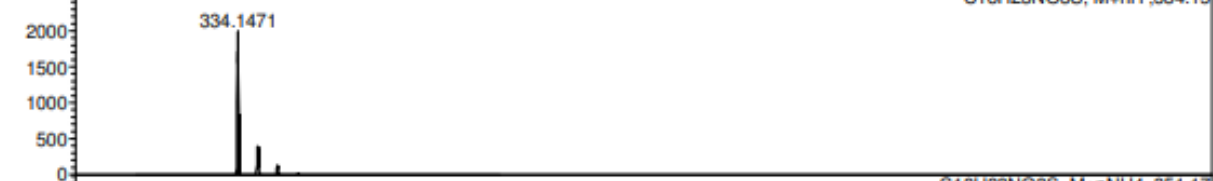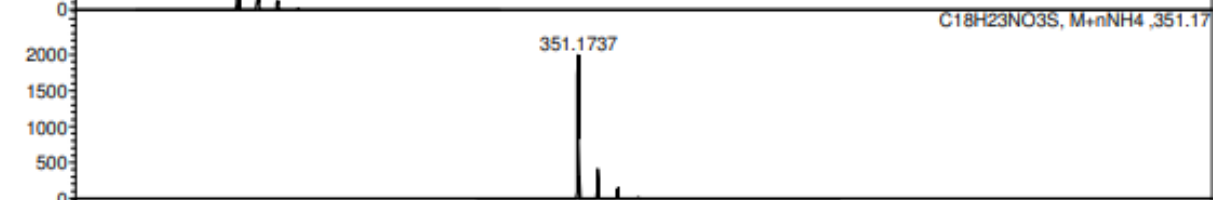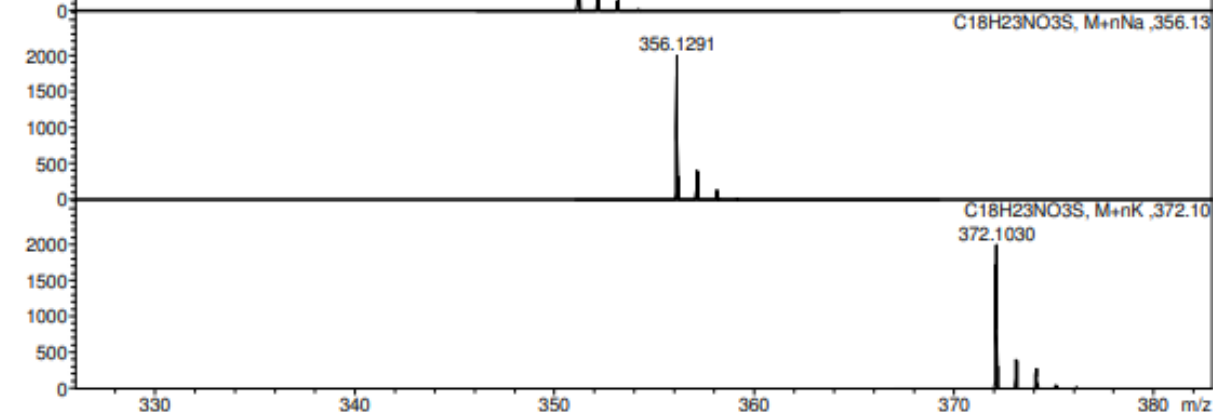

# HRMS spectrum of ethyl 2-(4-fluorobenzyl)-3-oxo-2-thiocyanatobutanoate, **21**

## Display Report

### Analysis Info

Analysis Name D:\Data\Kolotyrkina\2022\Kirillov\1006008.d  
 Method tune\_low.m  
 Sample Name /TERN Pil456  
 Comment C14H14FNO3S mH296.0751 clb added CH3CN

Acquisition Date 06.10.2022 10:50:08

Operator BDAL@DE  
 Instrument / Ser# microTOF 10248

### Acquisition Parameter

|             |            |                      |          |                  |           |
|-------------|------------|----------------------|----------|------------------|-----------|
| Source Type | ESI        | Ion Polarity         | Positive | Set Nebulizer    | 0.4 Bar   |
| Focus       | Not active |                      |          | Set Dry Heater   | 180 °C    |
| Scan Begin  | 50 m/z     | Set Capillary        | 4500 V   | Set Dry Gas      | 4.0 l/min |
| Scan End    | 2500 m/z   | Set End Plate Offset | -500 V   | Set Divert Valve | Waste     |

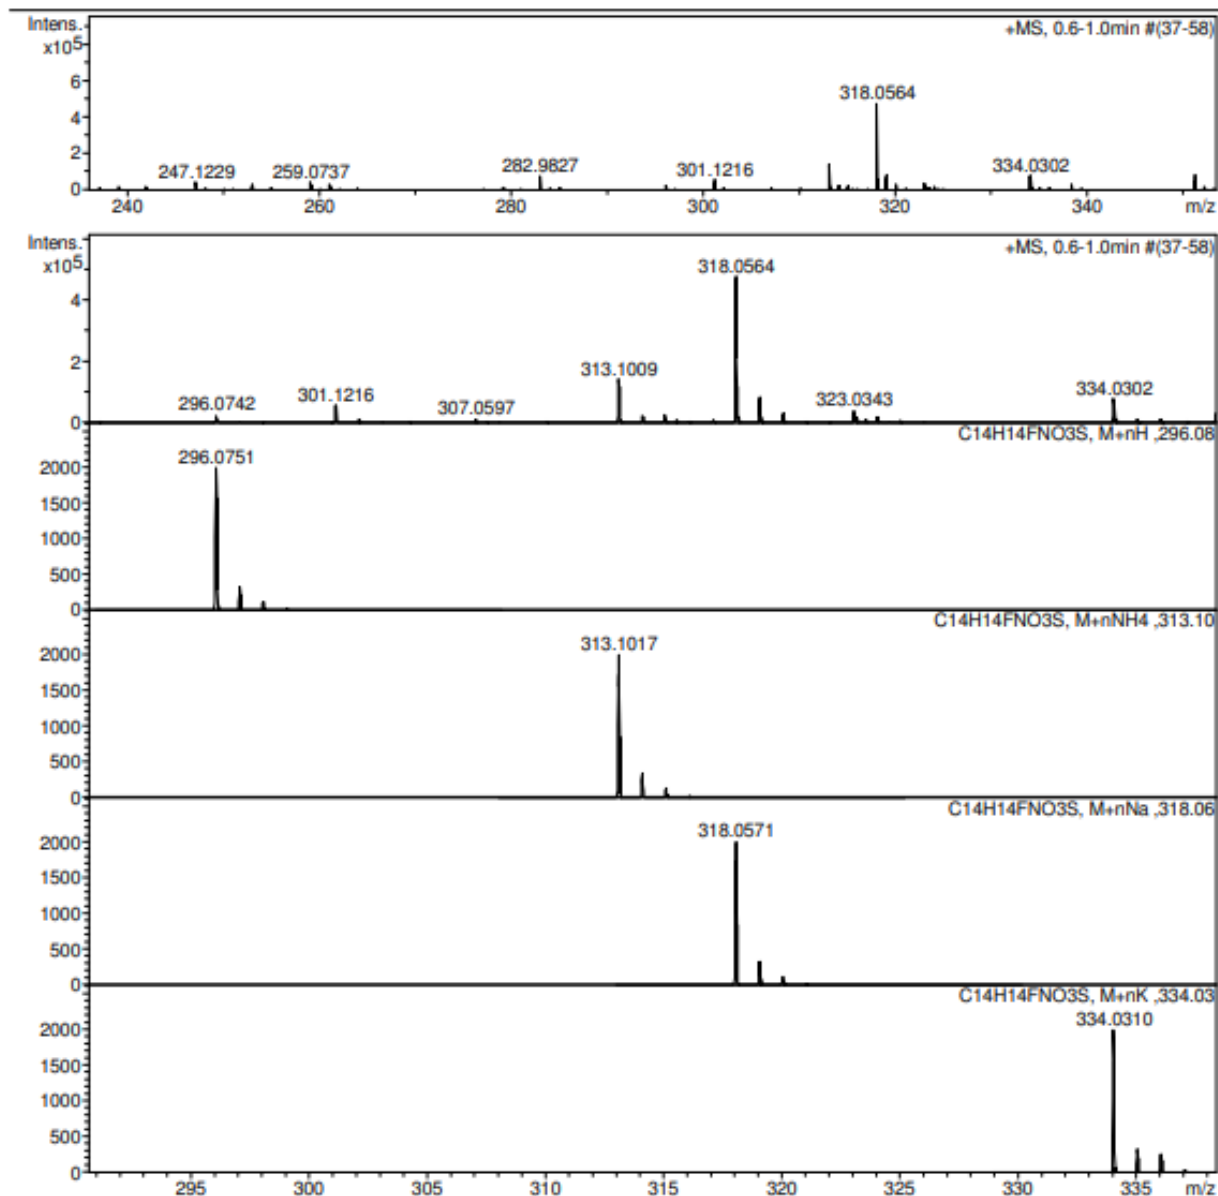

# HRMS spectrum of ethyl 2-acetyl-2-thiocyanatoundecanoate, **2o**

## Display Report

### Analysis Info

Analysis Name D:\Data\Kolotyrkina\2022\Kirillov\1101023.d  
 Method tune\_low.m  
 Sample Name /TERN SE-83  
 Comment C16H27NO3S mH314.1784 calibrant added, CH3CN

Acquisition Date 01.11.2022 15:23:10

Operator BDAL@DE  
 Instrument / Ser# microTOF 10248

### Acquisition Parameter

|             |            |                      |          |                  |           |
|-------------|------------|----------------------|----------|------------------|-----------|
| Source Type | ESI        | Ion Polarity         | Positive | Set Nebulizer    | 0.4 Bar   |
| Focus       | Not active |                      |          | Set Dry Heater   | 180 °C    |
| Scan Begin  | 50 m/z     | Set Capillary        | 4500 V   | Set Dry Gas      | 4.0 l/min |
| Scan End    | 2500 m/z   | Set End Plate Offset | -500 V   | Set Divert Valve | Waste     |

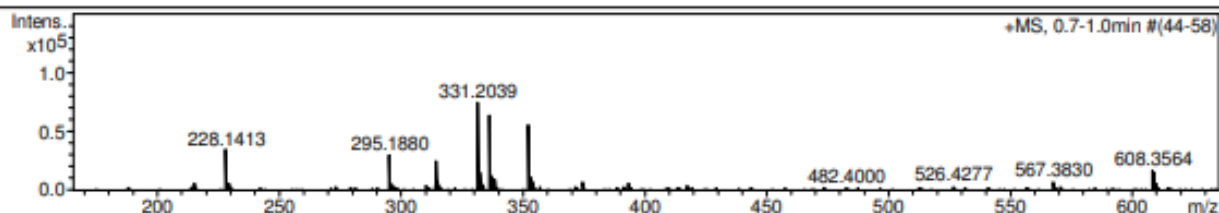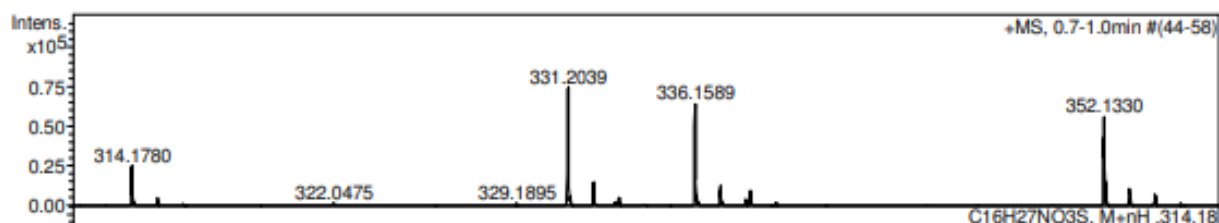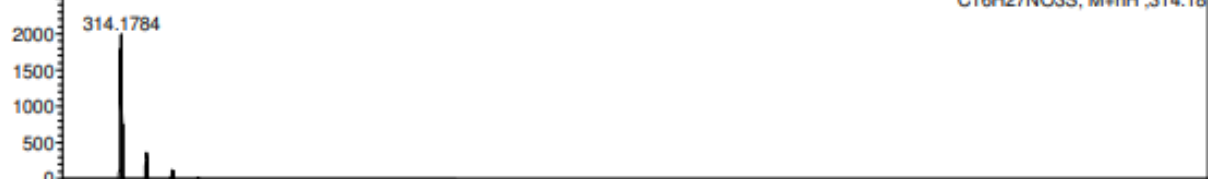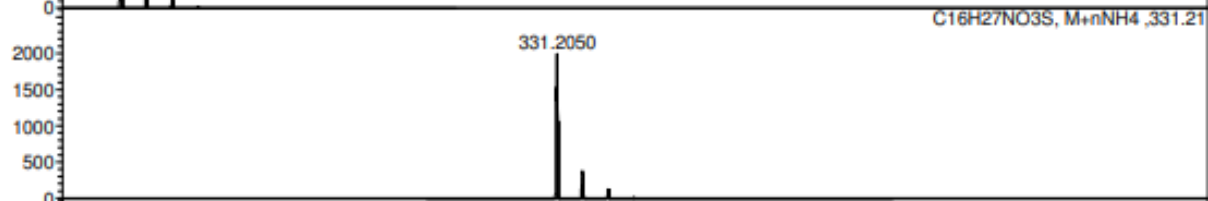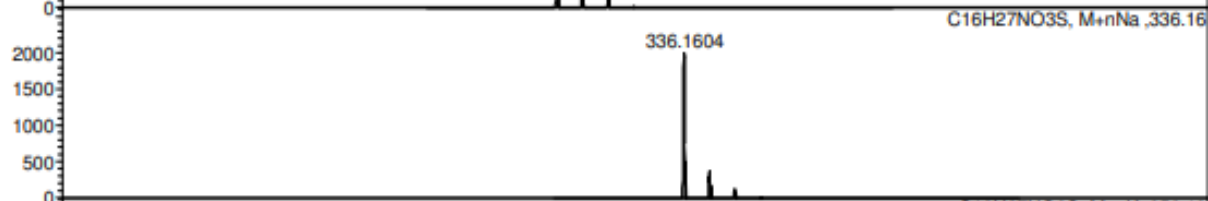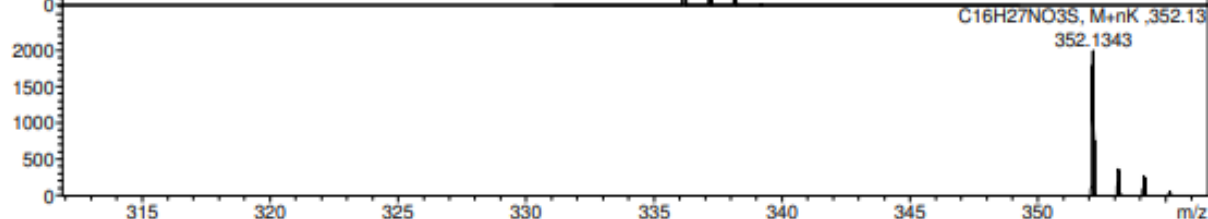

# HRMS spectrum of ethyl 2-acetyl-5-methyl-2-thiocyanatohexanoate, **2p**

## Display Report

### Analysis Info

Analysis Name D:\Data\Kolotyrkina\2022\Kirillov\1006005.d  
 Method tune\_low.m  
 Sample Name /TERN Pii384  
 Comment C12H19NO3S mH258.1158 clb added CH3CN

Acquisition Date 06.10.2022 10:25:10

Operator BDAL@DE  
 Instrument / Ser# micrOTOF 10248

### Acquisition Parameter

|             |            |                      |          |                  |           |
|-------------|------------|----------------------|----------|------------------|-----------|
| Source Type | ESI        | Ion Polarity         | Positive | Set Nebulizer    | 0.4 Bar   |
| Focus       | Not active |                      |          | Set Dry Heater   | 180 °C    |
| Scan Begin  | 50 m/z     | Set Capillary        | 4500 V   | Set Dry Gas      | 4.0 l/min |
| Scan End    | 2500 m/z   | Set End Plate Offset | -500 V   | Set Divert Valve | Waste     |

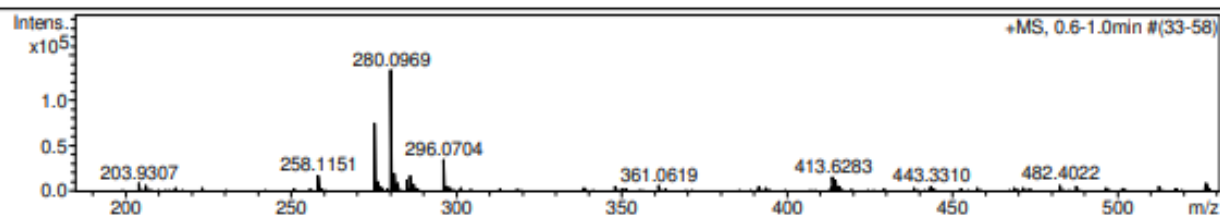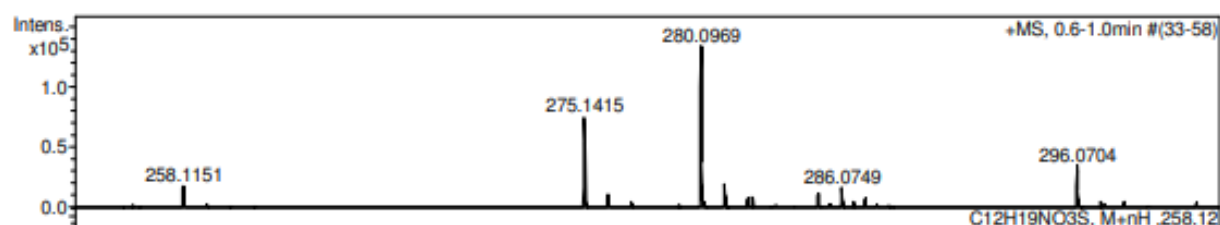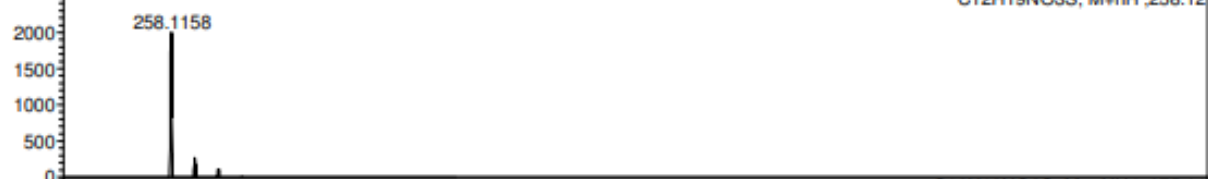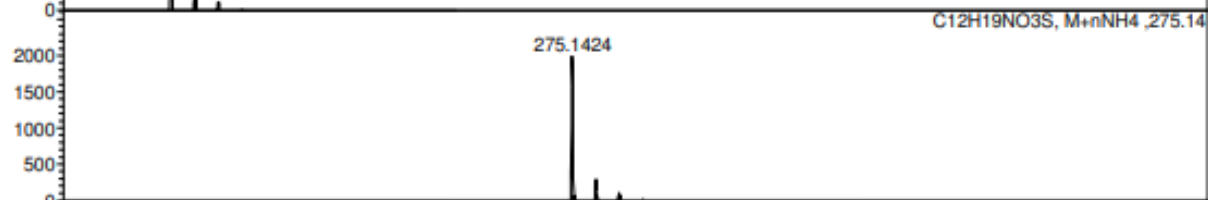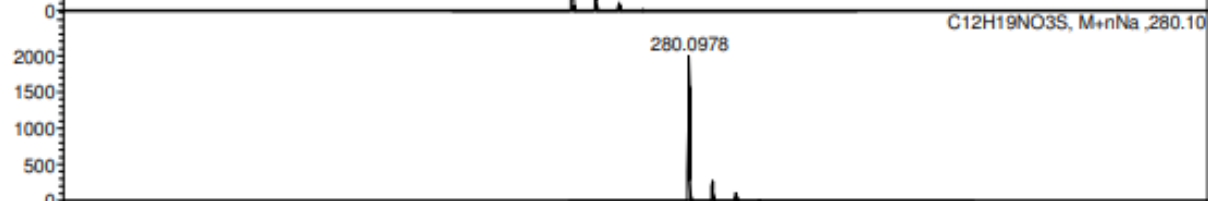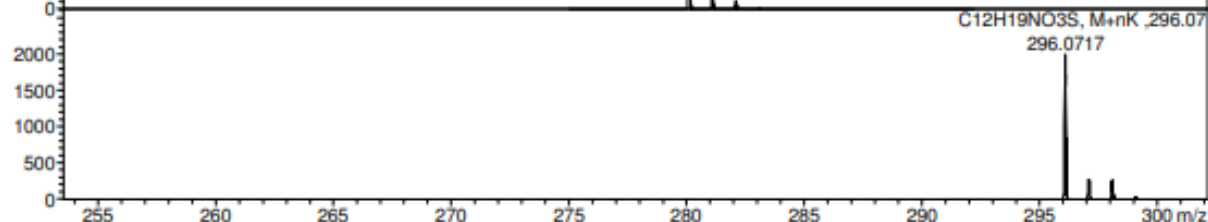

# HRMS spectrum of diethyl 2-acetyl-2-thiocyanatopentanedioate, **2q**

## Display Report

### Analysis Info

Analysis Name D:\Data\Kolotyrkina\2022\Kirillov\1101022.d  
 Method tune\_low.m  
 Sample Name /TERN SE-76  
 Comment C12H17NO5S mH289.0900 calibrant added, CH3CN

Acquisition Date 01.11.2022 15:17:29

Operator BDAL@DE  
 Instrument / Ser# microTOF 10248

### Acquisition Parameter

|             |            |                      |          |                  |           |
|-------------|------------|----------------------|----------|------------------|-----------|
| Source Type | ESI        | Ion Polarity         | Positive | Set Nebulizer    | 0.4 Bar   |
| Focus       | Not active |                      |          | Set Dry Heater   | 180 °C    |
| Scan Begin  | 50 m/z     | Set Capillary        | 4500 V   | Set Dry Gas      | 4.0 l/min |
| Scan End    | 2500 m/z   | Set End Plate Offset | -500 V   | Set Divert Valve | Waste     |

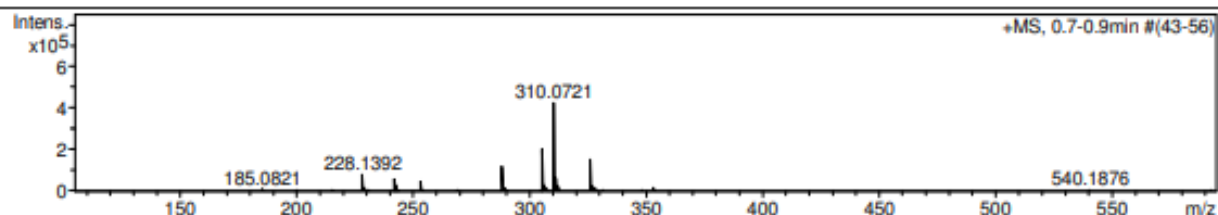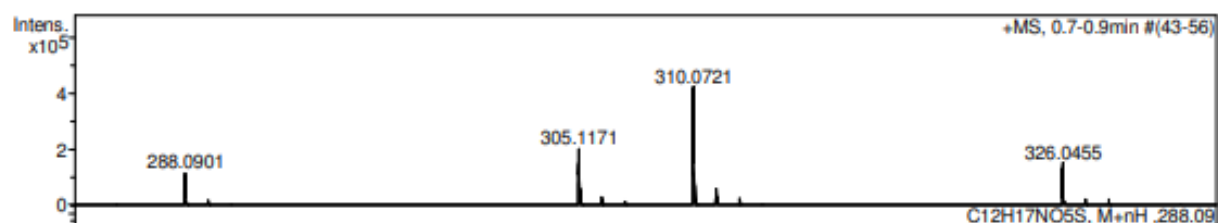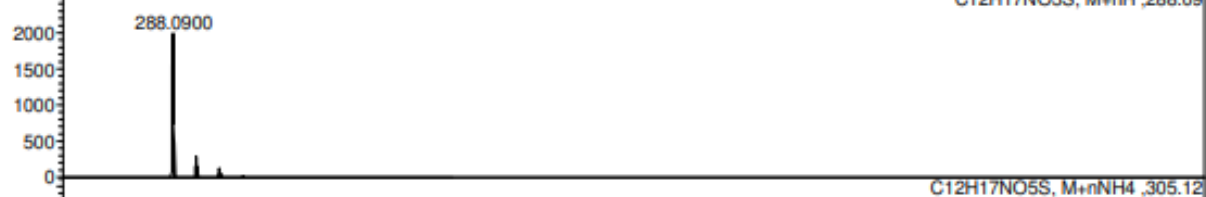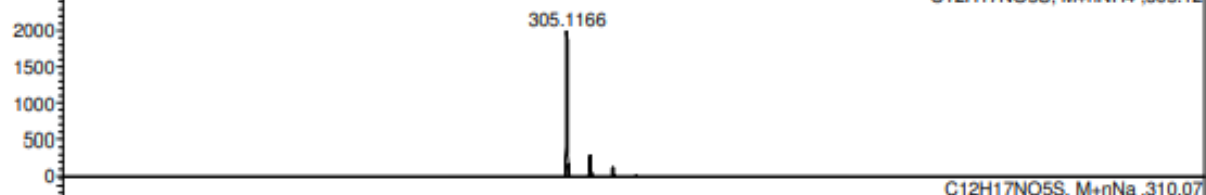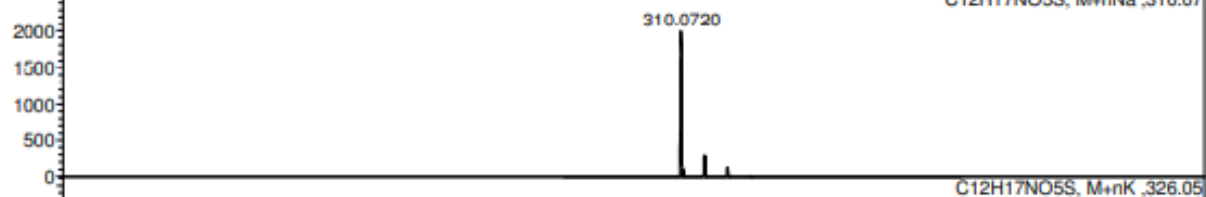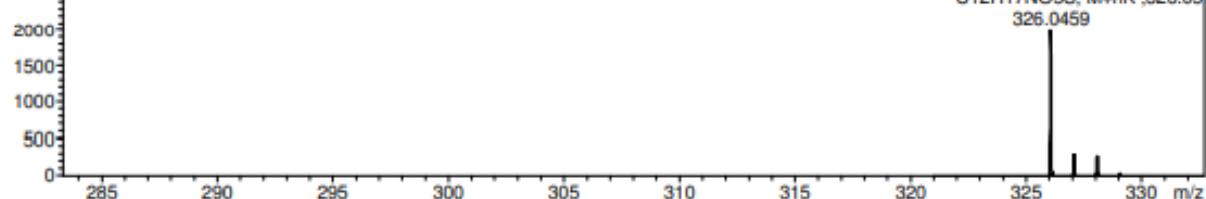

## Display Report

## Analysis Info

Analysis Name D:\Data\Chizhov\Terentiev\Kirillov\pil632\_&clblow.d  
Method tune\_low.m  
Sample Name /TERN Pil632  
Comment CH3CN 100 %, dil. 20, calibrant added

Acquisition Date 27.01.2023 16:36:52

Operator BDAL@DE  
Instrument / Ser# micrOTOF 10248

## Acquisition Parameter

|             |            |                      |          |                  |           |
|-------------|------------|----------------------|----------|------------------|-----------|
| Source Type | ESI        | Ion Polarity         | Positive | Set Nebulizer    | 0.4 Bar   |
| Focus       | Not active |                      |          | Set Dry Heater   | 180 °C    |
| Scan Begin  | 50 m/z     | Set Capillary        | 4500 V   | Set Dry Gas      | 4.0 l/min |
| Scan End    | 3000 m/z   | Set End Plate Offset | -500 V   | Set Divert Valve | Waste     |

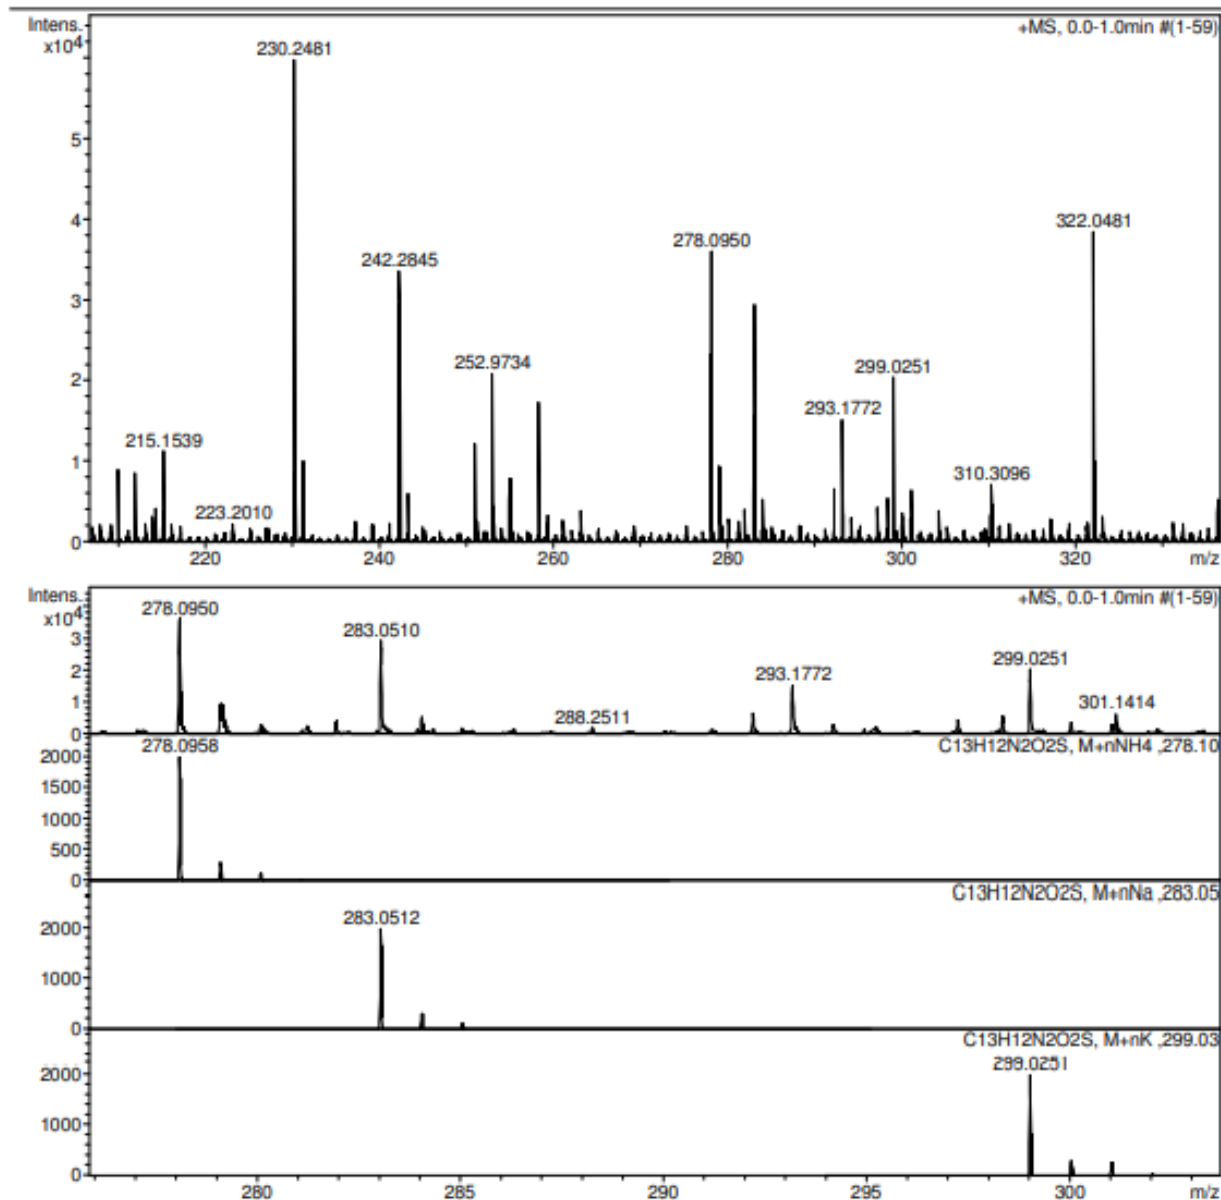

Supplement: d3ob00474k1.pdf [file d3ob00474k1.pdf]
